# Supplementary material for: Copper-mediated oxidative C−H/N−H activations with alkynes by removable hydrazides
Source: publisher site journal article supplement (doi:10.3762/bjoc.17.113), 2021-07-08

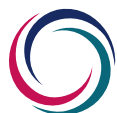

## Supporting Information

for

### Copper-mediated oxidative C–H/N–H activations with alkynes by removable hydrazides

Feng Xiong, Bo Li, Chenrui Yang, Liang Zou, Wenbo Ma, Linghui Gu, Ruhuai Mei  
and Lutz Ackermann

*Beilstein J. Org. Chem.* **2021**, *17*, 1591–1599. doi:10.3762/bjoc.17.113

### Characterization data for **3** and copies of $^1\text{H}$ , $^{13}\text{C}$ , and $^{19}\text{F}$ NMR spectra

## Table of contents

|                                                                        |      |
|------------------------------------------------------------------------|------|
| General remarks                                                        | S-2  |
| Optimization of the reaction conditions                                | S-3  |
| General procedure for the copper-promoted oxidative C–H/N–H activation | S-5  |
| Characterization data of products <b>3</b>                             | S-6  |
| Copper-mediated decarboxylative C–H/N–H activation                     | S-29 |
| Removal of the directing group                                         | S-30 |
| Mechanistic studies                                                    | S-31 |
| References                                                             | S-38 |
| NMR spectra                                                            | S-39 |

## General remarks

Reactions were carried out under an argon atmosphere using predried glassware, if not noted otherwise. Benzhydrazides **1** were synthesized according to a previously described method [1,2]. Other chemicals were obtained from commercial sources and were used without further purification. Yields refer to isolated compounds, estimated to be >95% pure as determined by  $^1\text{H}$  NMR. Chromatography separations were carried out on silica gel 60H (200–300 mesh) manufactured by Qingdao Haiyang Chemical Group Co. (China). High-resolution mass spectrometry (HRMS) was measured on Thermo-DFS mass spectrometer. NMR spectra were recorded on a JEOL 600 NMR spectrometer ( $^1\text{H}$ : 600 MHz;  $^{13}\text{C}$ : 150 MHz;  $^{19}\text{F}$ : 565 MHz) in  $\text{CDCl}_3$ . If not otherwise specified, chemical shifts ( $\delta$ ) are given in ppm.

## Optimization of the reaction conditions

**Table S-1:** Optimization of the copper-promoted oxidative C–H/N–H activation with alkynes.<sup>a</sup>

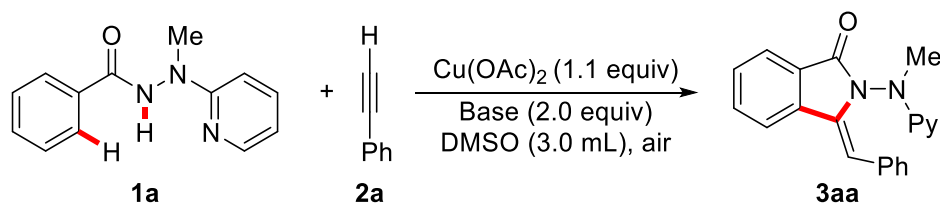

| entry | solvent | base                     | T (°C) | Z/E  | yield (%)          |
|-------|---------|--------------------------|--------|------|--------------------|
| 1     | DMF     | $\text{Na}_2\text{CO}_3$ | 90     | —    | trace              |
| 2     | NMP     | $\text{Na}_2\text{CO}_3$ | 90     | —    | trace              |
| 3     | DMSO    | $\text{Na}_2\text{CO}_3$ | 90     | 12:1 | 67                 |
| 4     | DMSO    | $\text{Na}_2\text{CO}_3$ | 110    | 8:1  | 57                 |
| 5     | DMSO    | $\text{Na}_2\text{CO}_3$ | 80     | 15:1 | 41                 |
| 6     | DMSO    | $\text{Na}_2\text{CO}_3$ | 60     | —    | 27                 |
| 7     | DMSO    | $\text{NaOAc}$           | 90     | —    | 25                 |
| 8     | DMSO    | $\text{NaOPiv}$          | 90     | —    | 30                 |
| 9     | DMSO    | $\text{K}_2\text{CO}_3$  | 90     | 18:1 | 58                 |
| 10    | DMSO    | $\text{Cs}_2\text{CO}_3$ | 90     | 20:1 | 44                 |
| 11    | DMSO    | DBU                      | 90     | —    | 13                 |
| 12    | DMSO    | $\text{Na}_2\text{CO}_3$ | 90     | 12:1 | 42 <sup>b</sup>    |
| 13    | DMSO    | $\text{Na}_2\text{CO}_3$ | 90     | 9:1  | 83 <sup>c</sup>    |
| 14    | DMSO    | $\text{Na}_2\text{CO}_3$ | 90     | 13:1 | 89 <sup>c,d</sup>  |
| 15    | DMSO    | $\text{Na}_2\text{CO}_3$ | 90     | 12:1 | 86 <sup>d,e</sup>  |
| 16    | DMSO    | —                        | 90     | —    | trace              |
| 17    | DMSO    | $\text{Na}_2\text{CO}_3$ | 90     | —    | trace <sup>e</sup> |
| 18    | DMSO    | $\text{Na}_2\text{CO}_3$ | 90     | —    | 37 <sup>f</sup>    |

<sup>a</sup>Reaction conditions: 25-mL Schlenk tube, **1a** (0.30 mmol), **2a** (0.90 mmol),  $\text{Cu}(\text{OAc})_2$  (1.1 equiv), base (2.0 equiv), solvent (3.0 mL), 15 h, under air. <sup>b</sup> $\text{Cu}(\text{OAc})_2$  (0.8 equiv).

<sup>c</sup>Cu(OAc)<sub>2</sub> (1.3 equiv). <sup>d</sup>DMSO (6.0 mL). <sup>e</sup>Cu(OAc)<sub>2</sub>·H<sub>2</sub>O (1.3 equiv). <sup>f</sup>Without Cu(OAc)<sub>2</sub>. <sup>g</sup>Under N<sub>2</sub>.

### **General procedure for the copper-promoted oxidative C–H/N–H activation with alkynes**

To a 25-mL Schlenk tube were added benzhydrazide **1** (0.30 mmol, 1.00 equiv), alkyne **2** (0.90 mmol, 3.0 equiv), Cu(OAc)<sub>2</sub> (71 mg, 0.39 mmol, 1.30 equiv), and Na<sub>2</sub>CO<sub>3</sub> (64 mg, 0.60 mmol, 2.00 equiv) under an air atmosphere. The mixture was stirred at 90 °C for 15 h. At ambient temperature, H<sub>2</sub>O (15 mL) and Et<sub>3</sub>N (0.5 mL) were added, and a suspension was formed immediately. After being filtered through a Celite® pad, the reaction mixture was extracted with EtOAc (3×20 mL). The combined organic phase was washed with brine (20 mL) and dried over Na<sub>2</sub>SO<sub>4</sub>. Then, Et<sub>3</sub>N (0.5 mL) and silica gel (0.8 g) were added, and the combined solvent was removed under reduced pressure. The residue solid sample was purified by column chromatography on silica gel (petroleum/EtOAc 5:1 to 2:1, with 1% Et<sub>3</sub>N), which yielded the desired product **3**.

### Characterization data of 3

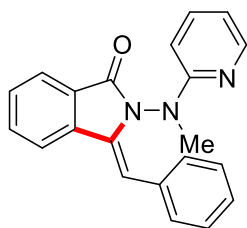

#### (Z)-3-Benzylidene-2-(methyl[pyridin-2-yl]amino)isoindolin-1-one (**3aa**)

The general procedure was followed using hydrazide **1a** (68.2 mg, 0.30 mmol) and alkyne **2a** (91.9 mg, 0.90 mmol). Purification by column chromatography on silica gel (petroleum/EtOAc 20:1, with 1% Et<sub>3</sub>N) yielded **3aa** (87.4 mg, 89%, *Z/E* = 13:1) as a light yellow solid. mp 67–68 °C. **<sup>1</sup>H NMR** (600 MHz, CDCl<sub>3</sub>)  $\delta$  = 8.13 (ddd, *J* = 5.0, 1.9, 0.9 Hz, 1H), 7.90 (dd, *J* = 7.6, 1.0 Hz, 1H), 7.85–7.82 (m, 1H), 7.70 (d, *J* = 1.2 Hz, 1H), 7.56 (dd, *J* = 7.6, 0.9 Hz, 1H), 7.44 (ddd, *J* = 8.8, 7.1, 1.9 Hz, 1H), 7.17–7.05 (m, 5H), 6.85 (d, *J* = 0.9 Hz, 1H), 6.67 (ddd, *J* = 7.2, 5.0, 0.9 Hz, 1H), 6.44–6.41 (m, 1H), 3.01 (s, 3H). **<sup>13</sup>C NMR** (150 MHz, CDCl<sub>3</sub>)  $\delta$  = 165.7 (C<sub>q</sub>), 157.6 (C<sub>q</sub>), 147.7 (CH), 137.4 (CH), 136.2 (C<sub>q</sub>), 133.2 (C<sub>q</sub>), 132.8 (CH), 132.1 (C<sub>q</sub>), 129.3 (CH), 128.7 (CH), 127.3 (CH), 127.3 (CH), 126.5 (C<sub>q</sub>), 123.8 (CH), 119.8 (CH), 114.3 (CH), 107.8 (CH), 106.4 (CH), 36.7 (CH<sub>3</sub>). **HR-MS** (ESI) *m/z* calcd for C<sub>21</sub>H<sub>18</sub>N<sub>3</sub>O [*M*+H<sup>+</sup>] 328.1444, found 328.1439.

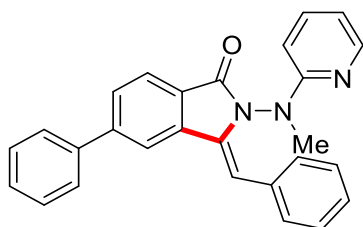

#### (Z)-3-Benzylidene-2-(methyl[pyridin-2-yl]amino)-5-phenylisoindolin-1-one (**3ba**)

The general procedure was followed using hydrazide **1b** (91.0 mg, 0.30 mmol) and alkyne **2a** (91.9 mg, 0.90 mmol). Purification by column chromatography on silica gel (petroleum/EtOAc 10:1) yielded **3ba** (65.3 mg, 54%, *Z/E* = 29:1) as a light yellow solid.

mp 135–136 °C. **<sup>1</sup>H NMR** (600 MHz, CDCl<sub>3</sub>)  $\delta$  = 8.15 (ddd,  $J$  = 5.0, 1.9, 0.9 Hz, 1H), 8.01 (dd,  $J$  = 1.6, 0.7 Hz, 1H), 7.97 (dd,  $J$  = 7.9, 0.7 Hz, 1H), 7.77 (dd,  $J$  = 7.9, 1.5 Hz, 1H), 7.71–7.68 (m, 2H), 7.55–7.51 (m, 2H), 7.48–7.44 (m, 2H), 7.19–7.07 (m, 5H), 6.92 (s, 1H), 6.68 (ddd,  $J$  = 7.1, 5.0, 0.9 Hz, 1H), 6.46 (dt,  $J$  = 8.5, 0.9 Hz, 1H), 3.03 (s, 3H). **<sup>13</sup>C NMR** (150 MHz, CDCl<sub>3</sub>)  $\delta$  = 165.6 (C<sub>q</sub>), 157.6 (C<sub>q</sub>), 147.8 (CH), 146.3 (C<sub>q</sub>), 140.2 (C<sub>q</sub>), 137.5 (CH), 136.9 (C<sub>q</sub>), 133.2 (C<sub>q</sub>), 132.2 (C<sub>q</sub>), 129.0 (CH), 128.8 (CH), 128.6 (CH), 128.4 (CH), 127.4 (CH), 127.4 (CH), 127.3 (CH), 125.3 (C<sub>q</sub>), 124.2 (CH), 118.5 (CH), 114.3 (CH), 107.9 (CH), 106.5 (CH), 36.7 (CH<sub>3</sub>). **HR-MS** (ESI)  $m/z$  calcd for C<sub>27</sub>H<sub>22</sub>N<sub>3</sub>O [M+H<sup>+</sup>] 404.1757, found 404.1755.

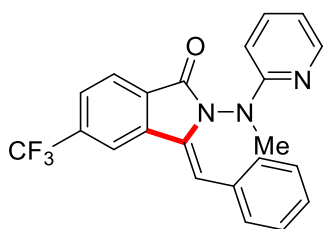

**(Z)-3-Benzylidene-2-(methyl[pyridin-2-yl]amino)-5-(trifluoromethyl)isoindolin-1-one (3ca)**

The general procedure was followed using hydrazide **1c** (88.6 mg, 0.30 mmol) and alkyne **2a** (91.0 mg, 0.90 mmol). Purification by column chromatography on silica gel (petroleum/EtOAc 10:1) yielded **3ca** (117.4 mg, 99%,  $Z/E$  = 43:1) as a light yellow solid. mp 121–122 °C. **<sup>1</sup>H NMR** (600 MHz, CDCl<sub>3</sub>)  $\delta$  = 8.14 (ddd,  $J$  = 5.0, 1.9, 0.9 Hz, 1H), 8.10 (d,  $J$  = 1.5 Hz, 1H), 8.03 (d,  $J$  = 7.9 Hz, 1H), 7.83–7.79 (m, 1H), 7.46 (ddd,  $J$  = 8.7, 7.1, 1.9 Hz, 1H), 7.19–7.15 (m, 1H), 7.13–7.06 (m, 4H), 6.94 (s, 1H), 6.70 (ddd,  $J$  = 7.2, 5.0, 0.9 Hz, 1H), 6.38 (dd,  $J$  = 8.5, 1.0 Hz, 1H), 3.02 (s, 3H). **<sup>13</sup>C NMR** (150 MHz, CDCl<sub>3</sub>)  $\delta$  = 164.5 (C<sub>q</sub>), 157.1 (C<sub>q</sub>), 147.9 (CH), 137.6 (CH), 136.5 (C<sub>q</sub>), 134.7 (q,  $^2J_{C-F}$  = 32.6 Hz, C<sub>q</sub>), 132.7 (C<sub>q</sub>), 131.4 (C<sub>q</sub>), 129.3 (C<sub>q</sub>), 128.7 (CH), 127.7 (CH), 127.4 (CH), 126.0 (q,  $^3J_{C-F}$  = 3.8 Hz, CH), 124.5 (CH), 123.6 (q,  $^1J_{C-F}$  = 271.0 Hz, C<sub>q</sub>), 117.3 (q,  $^3J_{C-F}$  = 4.0 Hz, CH), 114.7 (CH), 109.7 (CH), 106.3 (CH), 36.9 (CH<sub>3</sub>). **<sup>19</sup>F NMR** (565 MHz, CDCl<sub>3</sub>)  $\delta$  = -62.49. **HR-MS** (ESI)  $m/z$  calcd for C<sub>22</sub>H<sub>17</sub>F<sub>3</sub>N<sub>3</sub>O [M+H<sup>+</sup>] 396.1318, found 396.1316.



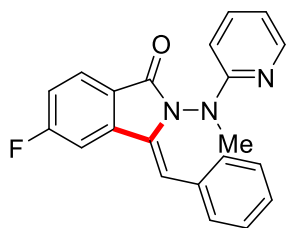

**(Z)-3-Benzylidene-5-fluoro-2-(methyl[pyridin-2-yl]amino)isoindolin-1-one (3da)**

The general procedure was followed using hydrazide **1d** (73.6 mg, 0.30 mmol) and alkyne **2a** (91.0 mg, 0.90 mmol). Purification by column chromatography on silica gel (petroleum/EtOAc 10:1) yielded **3da** (91.2 mg, 88%, *Z/E* = 8:1) as a light yellow solid. mp 119–120 °C. **<sup>1</sup>H NMR** (600 MHz, CDCl<sub>3</sub>)  $\delta$  = 8.13 (ddd, *J* = 5.0, 1.9, 0.9 Hz, 1H), 7.89 (dd, *J* = 8.4, 4.9 Hz, 1H), 7.51–7.42 (m, 3H), 7.19–7.14 (m, 1H), 7.11–7.07 (m, 4H), 6.80 (s, 1H), 6.68 (ddd, *J* = 7.1, 5.0, 0.9 Hz, 1H), 6.41 (dd, *J* = 8.5, 1.0 Hz, 1H), 3.00 (s, 3H). **<sup>13</sup>C NMR** (150 MHz, CDCl<sub>3</sub>)  $\delta$  = 166.0 (d, <sup>1</sup>*J*<sub>C-F</sub> = 252.7 Hz, C<sub>q</sub>), 164.9 (C<sub>q</sub>), 157.4 (C<sub>q</sub>), 147.8 (CH), 138.7 (d, <sup>3</sup>*J*<sub>C-F</sub> = 10.3 Hz, C<sub>q</sub>), 137.5 (CH), 132.8 (C<sub>q</sub>), 131.5 (d, <sup>4</sup>*J*<sub>C-F</sub> = 3.5 Hz, C<sub>q</sub>), 128.8 (CH), 127.6 (CH), 127.3 (CH), 126.2 (d, <sup>3</sup>*J*<sub>C-F</sub> = 10.0 Hz, CH), 122.7 (C<sub>q</sub>), 117.3 (d, <sup>2</sup>*J*<sub>C-F</sub> = 23.8 Hz, CH), 114.5 (CH), 108.9 (CH), 107.0 (d, <sup>2</sup>*J*<sub>C-F</sub> = 24.7 Hz, CH), 106.4 (CH), 36.8 (CH<sub>3</sub>). **<sup>19</sup>F NMR** (565 MHz, CDCl<sub>3</sub>)  $\delta$  = -(104.47–104.43, m, 1F). **HR-MS** (ESI) *m/z* calcd for C<sub>21</sub>H<sub>17</sub>N<sub>3</sub>O [M+H<sup>+</sup>] 346.1346, found 346.1350.

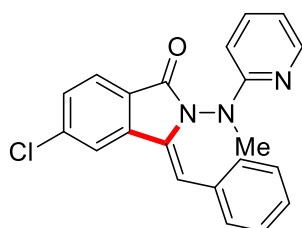

**(Z)-3-Benzylidene-5-chloro-2-(methyl[pyridin-2-yl]amino)isoindolin-1-one (3ea)**

The general procedure was followed using hydrazide **1e** (78.5 mg, 0.30 mmol) and alkyne **2a** (91.0 mg, 0.90 mmol). Purification by column chromatography on silica gel (petroleum/EtOAc 10:1) yielded **3ea** (97.7 mg, 90%, *Z/E* = 19:1) as a light yellow solid. mp 131–132 °C. **<sup>1</sup>H NMR** (600 MHz, CDCl<sub>3</sub>)  $\delta$  = 8.13 (ddd, *J* = 5.0, 1.9, 0.9 Hz, 1H),

7.85–7.80 (m, 2H), 7.52 (dd,  $J = 8.1, 1.7$  Hz, 1H), 7.45 (ddd,  $J = 8.7, 7.2, 1.9$  Hz, 1H), 7.18–7.13 (m, 1H), 7.09 (d,  $J = 5.8$  Hz, 4H), 6.82 (s, 1H), 6.70–6.66 (m, 1H), 6.39 (dd,  $J = 8.5, 1.0$  Hz, 1H), 3.00 (s, 3H).  **$^{13}\text{C}$  NMR** (150 MHz,  $\text{CDCl}_3$ )  $\delta = 164.9$  ( $\text{C}_q$ ), 157.3 ( $\text{C}_q$ ), 147.8 (CH), 139.4 ( $\text{C}_q$ ), 137.7 ( $\text{C}_q$ ), 137.5 (CH), 132.8 ( $\text{C}_q$ ), 131.3 ( $\text{C}_q$ ), 129.7 (CH), 128.8 (CH), 128.8 (CH), 127.6 (CH), 127.3 (CH), 127.3 (CH), 125.1 (CH), 124.9 ( $\text{C}_q$ ), 120.2 (CH), 114.5 (CH), 109.0 (CH), 106.3 (CH), 36.8 ( $\text{CH}_3$ ). **HR-MS** (ESI)  $m/z$  calcd for  $\text{C}_{21}\text{H}_{17}^{35}\text{ClN}_3\text{O}$  [ $\text{M}+\text{H}^+$ ] 362.1055, found 362.1054.

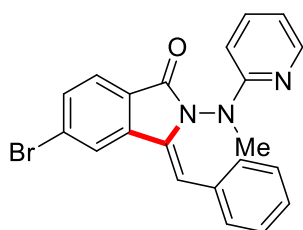

**(Z)-3-Benzylidene-5-bromo-2-(methyl[pyridin-2-yl]amino)isoindolin-1-one (3fa)**

The general procedure was followed using hydrazide **1f** (91.8 mg, 0.30 mmol) and alkyne **2a** (91.0 mg, 0.90 mmol). Purification by column chromatography on silica gel (petroleum/EtOAc 10:1) yielded **3fa** (108.5 mg, 89%,  $Z/E = 25:1$ ) as a light yellow solid. mp 140–141 °C.  **$^1\text{H}$  NMR** (600 MHz,  $\text{CDCl}_3$ )  $\delta = 8.13$  (ddd,  $J = 5.0, 2.1, 1.0$  Hz, 1H), 7.98 (d,  $J = 1.3$  Hz, 1H), 7.76 (dd,  $J = 8.1, 1.1$  Hz, 1H), 7.68 (dd,  $J = 8.1, 1.4$  Hz, 1H), 7.45 (ddd,  $J = 8.4, 7.2, 1.5$  Hz, 1H), 7.18–7.13 (m, 1H), 7.12–7.05 (m, 4H), 6.82 (d,  $J = 1.2$  Hz, 1H), 6.68 (ddd,  $J = 7.1, 5.0, 1.1$  Hz, 1H), 6.39 (dd,  $J = 8.5, 1.0$  Hz, 1H), 2.99 (s, 3H).  **$^{13}\text{C}$  NMR** (150 MHz,  $\text{CDCl}_3$ )  $\delta = 165.0$  ( $\text{C}_q$ ), 157.3 ( $\text{C}_q$ ), 147.8 (CH), 137.9 ( $\text{C}_q$ ), 137.5 (CH), 132.8 ( $\text{C}_q$ ), 132.5 (CH), 131.1 ( $\text{C}_q$ ), 128.8 (CH), 128.8 (CH), 127.7 ( $\text{C}_q$ ), 127.6 (CH), 127.4 (CH), 127.4 (CH), 125.3 ( $\text{C}_q$ ), 125.2 (CH), 123.2 (CH), 114.5 (CH), 109.1 (CH), 106.4 (CH), 36.8 ( $\text{CH}_3$ ). **HR-MS** (ESI)  $m/z$  calcd for  $\text{C}_{21}\text{H}_{17}\text{BrN}_3\text{O}$  [ $\text{M}+\text{H}^+$ ] 406.0550, found 406.0552.

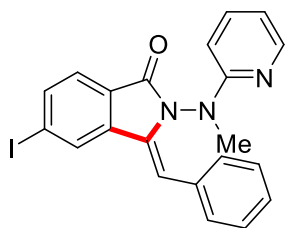

**(Z)-3-Benzylidene-5-iodo-2-(methyl[pyridin-2-yl]amino)isoindolin-1-one (3ga)**

The general procedure was followed using hydrazide **1g** (105.9 mg, 0.30 mmol) and alkyne **2a** (91.0 mg, 0.90 mmol). Purification by column chromatography on silica gel (petroleum/EtOAc 10:1) yielded **3ga** (81.6 mg, 60%, *Z/E* = 9:1) as a light yellow solid. mp 132–133 °C. **<sup>1</sup>H NMR** (600 MHz, CDCl<sub>3</sub>)  $\delta$  = 8.19 (d, *J* = 1.3 Hz, 1H), 8.12 (ddd, *J* = 5.0, 2.0, 0.9 Hz, 1H), 7.88 (dd, *J* = 8.0, 1.3 Hz, 1H), 7.61 (d, *J* = 8.0 Hz, 1H), 7.47–7.40 (m, 1H), 7.15 (p, *J* = 4.3 Hz, 1H), 7.07 (d, *J* = 4.5 Hz, 4H), 6.80 (s, 1H), 6.69–6.65 (m, 1H), 6.37 (d, *J* = 8.5 Hz, 1H), 2.98 (s, 3H). **<sup>13</sup>C NMR** (150 MHz, CDCl<sub>3</sub>)  $\delta$  = 165.2 (C<sub>q</sub>), 157.3 (C<sub>q</sub>), 147.8 (CH), 138.3 (CH), 137.7 (C<sub>q</sub>), 137.5 (CH), 132.9 (C<sub>q</sub>), 130.9 (C<sub>q</sub>), 129.1 (CH), 128.7 (CH), 127.6 (CH), 127.3 (CH), 125.8 (C<sub>q</sub>), 125.1 (CH), 114.5 (CH), 109.0 (CH), 106.3 (CH), 99.8 (C<sub>q</sub>), 36.8 (CH<sub>3</sub>). **HR-MS** (ESI) *m/z* calcd for C<sub>21</sub>H<sub>17</sub>IN<sub>3</sub>O [M+H<sup>+</sup>] 454.0411, found 454.0408.

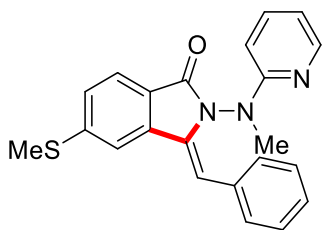

**(Z)-3-Benzylidene-2-(methyl(pyridin-2-yl)amino)-5-(methylthio)isoindolin-1-one (3ha)**

The general procedure was followed using hydrazide **1h** (82.0 mg, 0.30 mmol) and alkyne **2a** (91.0 mg, 0.90 mmol). Purification by column chromatography on silica gel (petroleum/EtOAc 10:1) yielded **3ha** (88.5 mg, 79%, *Z/E* = 14:1) as a light yellow solid. mp 71–72 °C. **<sup>1</sup>H NMR** (600 MHz, CDCl<sub>3</sub>)  $\delta$  = 8.70 (s, 1H), 8.36 (s, 1H), 8.10 (d, *J* = 4.5 Hz, 1H), 7.68 (d, *J* = 8.2 Hz, 1H), 7.45 – 7.41 (m, 1H), 7.34 (dd, *J* = 8.3, 1.2 Hz,

1H), 7.14 – 7.08 (m, 1H), 7.07 – 7.01 (m, 4H), 6.79 (s, 1H), 6.66 (dd,  $J = 6.8, 5.5$  Hz, 1H), 6.39 (d,  $J = 8.4$  Hz, 1H), 2.95 (s, 3H), 2.09 (s, 3H).  **$^{13}\text{C}$  NMR** (150 MHz,  $\text{CDCl}_3$ )  $\delta = 169.3$  ( $\text{C}_q$ ), 165.8 ( $\text{C}_q$ ), 157.5 ( $\text{C}_q$ ), 147.6 (CH), 143.0 ( $\text{C}_q$ ), 137.7 (CH), 133.1 ( $\text{C}_q$ ), 131.9 ( $\text{C}_q$ ), 128.8 (CH), 128.8 (CH), 127.4 (CH), 127.3 (CH), 127.3 (CH), 124.3 (CH), 121.4 ( $\text{C}_q$ ), 120.4 (CH), 114.5 (CH), 110.4 (CH), 108.6 (CH), 106.5 (CH), 36.8 ( $\text{CH}_3$ ), 24.5 ( $\text{CH}_3$ ). **HR-MS** (ESI)  $m/z$  calcd for  $\text{C}_{22}\text{H}_{20}\text{N}_3\text{OS}$   $[\text{M}+\text{H}^+]$  374.1322, found 374.1319.

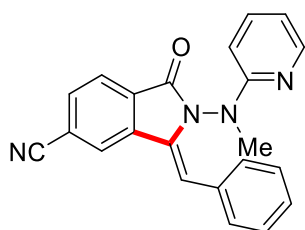

**(Z)-3-Benzylidene-2-(methyl[pyridin-2-yl]amino)-1-oxoisindoline-5-carbonitrile (3ia)**

The general procedure was followed using hydrazide **1i** (75.7 mg, 0.30 mmol) and alkyne **2a** (91.0 mg, 0.90 mmol). Purification by column chromatography on silica gel (petroleum/EtOAc 10:1) yielded **3ia** (100.4 mg, 95%,  $Z/E = 19:1$ ) as a light yellow solid. mp 168–169 °C.  **$^1\text{H}$  NMR** (600 MHz,  $\text{CDCl}_3$ )  $\delta = 8.12$  (dd,  $J = 4.7, 1.5$  Hz, 2H), 8.00 (dd,  $J = 7.8, 0.8$  Hz, 1H), 7.80 (dd,  $J = 7.8, 1.3$  Hz, 1H), 7.45 (ddd,  $J = 8.7, 7.2, 1.9$  Hz, 1H), 7.19–7.14 (m, 1H), 7.11–7.09 (m, 4H), 6.90 (s, 1H), 6.70 (ddd,  $J = 7.2, 5.0, 0.9$  Hz, 1H), 6.35 (dd,  $J = 8.5, 0.9$  Hz, 1H), 3.00 (s, 3H).  **$^{13}\text{C}$  NMR** (150 MHz,  $\text{CDCl}_3$ )  $\delta = 164.1$  ( $\text{C}_q$ ), 157.0 ( $\text{C}_q$ ), 147.9 (CH), 137.6 (CH), 136.6 ( $\text{C}_q$ ), 132.5 ( $\text{C}_q$ ), 132.3 (CH), 130.8 ( $\text{C}_q$ ), 129.7 ( $\text{C}_q$ ), 128.8 (CH), 127.9 (CH), 127.4 (CH), 124.7 (CH), 124.1 (CH), 118.0 ( $\text{C}_q$ ), 116.2 ( $\text{C}_q$ ), 114.8 (CH), 110.4 (CH), 106.3 (CH), 37.0 ( $\text{CH}_3$ ). **HR-MS** (ESI)  $m/z$  calcd for  $\text{C}_{22}\text{H}_{17}\text{N}_4\text{O}$   $[\text{M}+\text{H}^+]$  353.1397, found 353.1395.

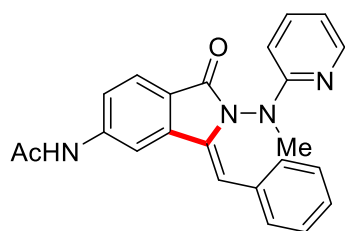

**(Z)-N-{3-Benzylidene-2-(methyl[pyridin-2-yl]amino)-1-oxoisindolin-5-yl}acetamide (3ja)**

The general procedure was followed using hydrazide **1j** (85.3 mg, 0.30 mmol) and alkyne **2a** (91.0 mg, 0.90 mmol). Purification by column chromatography on silica gel (petroleum/EtOAc 10:1) yielded **3ja** (98.0 mg, 85%, *Z/E* = 9:1) as a light yellow solid. mp 74–75 °C. <sup>1</sup>H NMR (600 MHz, CDCl<sub>3</sub>)  $\delta$  = 8.12 (ddd, *J* = 5.0, 2.1, 1.0 Hz, 1H), 7.77 (d, *J* = 7.9 Hz, 1H), 7.62 (d, *J* = 1.5 Hz, 1H), 7.49–7.40 (m, 2H), 7.38 (dd, *J* = 8.1, 1.4 Hz, 1H), 7.17–7.12 (m, 1H), 7.11–7.05 (m, 4H), 6.82 (s, 1H), 6.70–6.64 (m, 1H), 6.42 (dd, *J* = 8.5, 1.0 Hz, 1H), 2.99 (s, 3H), 2.61 (s, 3H). <sup>13</sup>C NMR (150 MHz, CDCl<sub>3</sub>)  $\delta$  = 165.5 (C<sub>q</sub>), 165.5 (C<sub>q</sub>), 157.6 (C<sub>q</sub>), 147.7 (CH), 145.8 (C<sub>q</sub>), 137.5 (CH), 136.9 (C<sub>q</sub>), 133.2 (C<sub>q</sub>), 131.8 (C<sub>q</sub>), 128.8 (CH), 127.4 (CH), 127.3 (CH), 126.5 (CH), 123.9 (CH), 123.0 (C<sub>q</sub>), 116.1 (CH), 114.3 (CH), 107.9 (CH), 106.4 (CH), 36.7 (CH<sub>3</sub>), 15.3 (CH<sub>3</sub>). HR-MS (ESI) *m/z* calcd for C<sub>23</sub>H<sub>21</sub>N<sub>4</sub>O<sub>2</sub> [M+H<sup>+</sup>] 385.1659, found 385.1656.

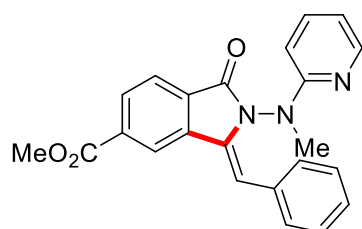

**Methyl-(Z)-3-benzylidene-2-(methyl[pyridin-2-yl]amino)-1-oxoisindoline-5-carboxylate (3ka)**

The general procedure was followed using hydrazide **1k** (85.6 mg, 0.30 mmol) and alkyne **2a** (91.0 mg, 0.90 mmol). Purification by column chromatography on silica gel (petroleum/EtOAc 10:1) yielded **3ka** (80.9 mg, 70%, *Z/E* = 14:1) as a light yellow solid. mp 155–156 °C. <sup>1</sup>H NMR (600 MHz, CDCl<sub>3</sub>)  $\delta$  = 8.51 (s, 1H), 8.20 (dd, *J* = 7.9, 1.3 Hz, 1H), 8.12 (ddd, *J* = 5.0, 1.9, 0.9 Hz, 1H), 7.95 (dd, *J* = 7.9, 0.8 Hz, 1H), 7.43 (ddd, *J* = 8.5, 7.2, 1.9 Hz, 1H), 7.18–7.12 (m, 1H), 7.13–7.05 (m, 6H), 6.94 (s, 1H), 6.67 (ddd,

$J = 7.2, 5.0, 0.9$  Hz, 1H), 6.38 (d,  $J = 8.5$  Hz, 1H), 3.99 (s, 3H), 3.00 (s, 3H).  **$^{13}\text{C}$  NMR** (150 MHz,  $\text{CDCl}_3$ )  $\delta = 166.1$  ( $\text{C}_q$ ), 164.8 ( $\text{C}_q$ ), 157.3 ( $\text{C}_q$ ), 147.8 (CH), 137.5 (CH), 136.2 ( $\text{C}_q$ ), 134.1 ( $\text{C}_q$ ), 132.9 ( $\text{C}_q$ ), 131.6 ( $\text{C}_q$ ), 130.1 (CH), 129.9 ( $\text{C}_q$ ), 128.8 (CH), 127.6 (CH), 127.3 (CH), 123.8 (CH), 121.4 (CH), 114.5 (CH), 109.1 (CH), 106.3 (CH), 52.7 ( $\text{CH}_3$ ), 36.8 ( $\text{CH}_3$ ). **HR-MS** (ESI)  $m/z$  calcd for  $\text{C}_{23}\text{H}_{20}\text{N}_3\text{O}_3$   $[\text{M}+\text{H}^+]$  386.1499, found 386.1498.

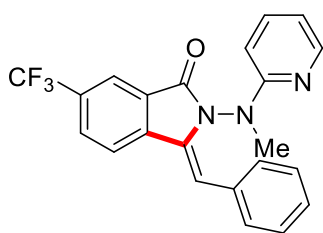

**(Z)-3-Benzylidene-2-(methyl(pyridin-2-yl)amino)-6-(trifluoromethyl)isoindolin-1-one (3la)**

The general procedure was followed using hydrazide **1l** (88.6 mg, 0.30 mmol) and alkyne **2a** (91.0 mg, 0.90 mmol). Purification by column chromatography on silica gel (petroleum/EtOAc 10:1) yielded **3la** (116.2 mg, 98%,  $Z/E = 13:1$ ) as a light yellow solid. mp 119–120 °C.  **$^1\text{H}$  NMR** (600 MHz,  $\text{CDCl}_3$ )  $\delta = 8.17$  (s, 1H), 8.13 (dd,  $J = 5.0, 1.5$  Hz, 1H), 7.96–7.91 (m, 2H), 7.47–7.42 (m, 1H), 7.20–7.14 (m, 1H), 7.12–7.05 (m, 4H), 6.94 (s, 1H), 6.69 (dd,  $J = 7.3, 4.9$  Hz, 1H), 6.38 (d,  $J = 8.4$  Hz, 1H), 3.01 (s, 3H).  **$^{13}\text{C}$  NMR** (150 MHz,  $\text{CDCl}_3$ )  $\delta = 164.5$  ( $\text{C}_q$ ), 157.2 ( $\text{C}_q$ ), 147.9 (CH), 139.1 ( $\text{C}_q$ ), 137.6 (CH), 132.7 ( $\text{C}_q$ ), 131.5 (q,  $^2J_{\text{C-F}} = 35.1$  Hz,  $\text{C}_q$ ), 131.4 ( $\text{C}_q$ ), 129.5 (q,  $^3J_{\text{C-F}} = 3.8$  Hz, CH), 128.8 (CH), 127.8 (CH), 127.4 (CH), 127.0 ( $\text{C}_q$ ), 123.6 (q,  $^1J_{\text{C-F}} = 272.7$  Hz,  $\text{C}_q$ ), 121.2 (q,  $^3J_{\text{C-F}} = 4.0$  Hz, CH), 120.5 (CH), 114.7 (CH), 110.3 (CH), 106.3 (CH), 36.9 ( $\text{CH}_3$ ).  **$^{19}\text{F}$  NMR** (565 MHz,  $\text{CDCl}_3$ )  $\delta = -62.27$  (s, 3F). **HR-MS** (ESI)  $m/z$  calcd for  $\text{C}_{22}\text{H}_{17}\text{F}_3\text{N}_3\text{O}$   $[\text{M}+\text{H}^+]$  396.1318, found 396.1314.

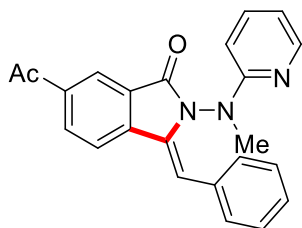

**(Z)-6-Acetyl-3-benzylidene-2-(methyl(pyridin-2-yl)amino)isoindolin-1-one (3ma)**

The general procedure was followed using hydrazide **1m** (80.8 mg, 0.30 mmol) and alkyne **2a** (91.0 mg, 0.90 mmol). Purification by column chromatography on silica gel (petroleum/EtOAc 10:1) yielded **3ma** (70.9 mg, 64%, *Z/E* = 15:1) as a light yellow solid. mp 132–133 °C. <sup>1</sup>H NMR (600 MHz, CDCl<sub>3</sub>)  $\delta$  = 8.43 (s, 1H), 8.32 (dd, *J* = 8.2, 1.3 Hz, 1H), 8.13 (dd, *J* = 4.7, 1.5 Hz, 1H), 7.92 (d, *J* = 8.1 Hz, 1H), 7.47 – 7.41 (m, 1H), 7.16 (t, *J* = 6.9 Hz, 1H), 7.13 – 7.05 (m, 4H), 6.94 (s, 1H), 6.69 (dd, *J* = 6.9, 5.1 Hz, 1H), 6.40 (d, *J* = 8.4 Hz, 1H), 3.01 (s, 3H), 2.69 (s, 3H). <sup>13</sup>C NMR (150 MHz, CDCl<sub>3</sub>)  $\delta$  = 196.8 (C<sub>q</sub>), 165.1 (C<sub>q</sub>), 157.3 (C<sub>q</sub>), 147.9 (CH), 140.0 (C<sub>q</sub>), 137.7 (C<sub>q</sub>), 137.6 (CH), 132.8 (C<sub>q</sub>), 132.2 (CH), 131.7 (C<sub>q</sub>), 128.8 (CH), 128.8 (CH), 127.8 (CH), 127.4 (CH), 127.4 (CH), 126.8 (C<sub>q</sub>), 124.3 (CH), 120.3 (CH), 114.6 (CH), 110.5 (CH), 106.4 (CH), 36.9 (CH<sub>3</sub>), 26.8 (CH<sub>3</sub>). HR-MS (ESI) *m/z* calcd for C<sub>23</sub>H<sub>20</sub>N<sub>3</sub>O<sub>2</sub> [M+H<sup>+</sup>] 370.1550, found 370.1548.

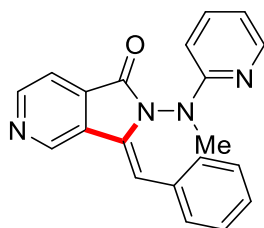

**(Z)-3-Benzylidene-2-(methyl[pyridin-2-yl]amino)-2,3-dihydro-1H-pyrrolo[3,4-c]pyridin-1-one (3na)**

The general procedure was followed using hydrazide **1n** (68.5 mg, 0.30 mmol) and alkyne **2a** (91.0 mg, 0.90 mmol). Purification by column chromatography on silica gel (petroleum/EtOAc 10:1) yielded **3na** (68.0 mg, 69%, *Z/E* = 27:1) as a light yellow solid. mp 143–144 °C. <sup>1</sup>H NMR (600 MHz, CDCl<sub>3</sub>)  $\delta$  = 9.21 (d, *J* = 1.2 Hz, 1H), 8.83 (d, *J* = 5.0 Hz, 1H), 8.24–8.08 (m, 1H), 7.76 (dd, *J* = 5.0, 1.2 Hz, 1H), 7.44 (ddd, *J* = 8.8, 7.2, 1.9 Hz, 1H), 7.16 (tt, *J* = 6.4, 2.0 Hz, 1H), 7.09 (h, *J* = 6.0 Hz, 4H), 6.97 (s, 1H),

6.69 (dd,  $J = 7.2, 5.0$  Hz, 1H), 6.35 (d,  $J = 8.5$  Hz, 1H), 3.00 (s, 3H).  **$^{13}\text{C}$  NMR** (150 MHz,  $\text{CDCl}_3$ )  $\delta = 164.2$  ( $\text{C}_q$ ), 157.0 ( $\text{C}_q$ ), 149.8 (CH), 147.9 (CH), 142.7 (CH), 137.6 (CH), 133.2 ( $\text{C}_q$ ), 132.6 ( $\text{C}_q$ ), 130.6 ( $\text{C}_q$ ), 130.3 ( $\text{C}_q$ ), 128.7 (CH), 127.7 (CH), 127.4 (CH), 117.0 (CH), 114.8 (CH), 110.3 (CH), 106.3 (CH), 36.9 ( $\text{CH}_3$ ). **HR-MS** (ESI)  $m/z$  calcd for  $\text{C}_{20}\text{H}_{17}\text{N}_4\text{O}$  [ $\text{M}+\text{H}^+$ ] 329.1397, found 329.1391.

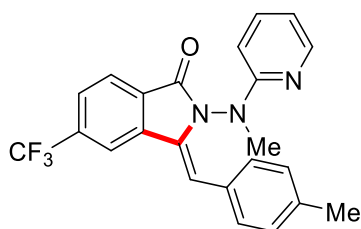

**(Z)-2-[Methyl(pyridin-2-yl)amino]-3-(4-methylbenzylidene)-5-(trifluoromethyl)isoindolin-1-one (3cb)**

The general procedure was followed using hydrazide **1c** (88.6 mg, 0.30 mmol) and alkyne **2b** (104.5 mg, 0.90 mmol). Purification by column chromatography on silica gel (petroleum/EtOAc 10:1) yielded **3cb** (109.3 mg, 89%) as a light yellow solid. mp 135–136 °C.  **$^1\text{H}$  NMR** (600 MHz,  $\text{CDCl}_3$ )  $\delta = 8.16$  (ddd,  $J = 5.0, 1.9, 0.9$  Hz, 1H), 8.08 (s, 1H), 8.01 (d,  $J = 7.2$  Hz, 1H), 7.78 (d,  $J = 9.3$  Hz, 1H), 7.46 (ddd,  $J = 8.7, 7.1, 1.8$  Hz, 1H), 7.02 (d,  $J = 7.9$  Hz, 2H), 6.92–6.89 (m, 3H), 6.70 (ddd,  $J = 7.2, 5.0, 0.9$  Hz, 1H), 6.42 (dd,  $J = 8.5, 0.9$  Hz, 1H), 3.03 (s, 3H), 2.26 (s, 3H).  **$^{13}\text{C}$  NMR** (150 MHz,  $\text{CDCl}_3$ )  $\delta = 164.5$  ( $\text{C}_q$ ), 157.4 ( $\text{C}_q$ ), 147.9 (CH), 137.7 ( $\text{C}_q$ ), 137.6 (CH), 136.7 ( $\text{C}_q$ ), 134.6 (q,  $^2J_{\text{C-F}} = 32.4$  Hz,  $\text{C}_q$ ), 130.8 ( $\text{C}_q$ ), 129.6 ( $\text{C}_q$ ), 129.2 ( $\text{C}_q$ ), 128.9 (CH), 128.2 (CH), 125.8 (q,  $^3J_{\text{C-F}} = 3.6$  Hz, CH), 124.5 (CH), 123.6 (q,  $^1J_{\text{C-F}} = 273.1$  Hz,  $\text{C}_q$ ), 117.2 (q,  $^3J_{\text{C-F}} = 4.1$  Hz, CH), 114.7 (CH), 110.1 (CH), 106.4 (CH), 36.9 ( $\text{CH}_3$ ), 21.2 ( $\text{CH}_3$ ).  **$^{19}\text{F}$  NMR** (565 MHz,  $\text{CDCl}_3$ )  $\delta = -62.49$  (s, 3F). **HR-MS** (ESI)  $m/z$  calcd for  $\text{C}_{23}\text{H}_{19}\text{F}_3\text{N}_3\text{O}$  [ $\text{M}+\text{H}^+$ ] 410.1475, found 410.1473.



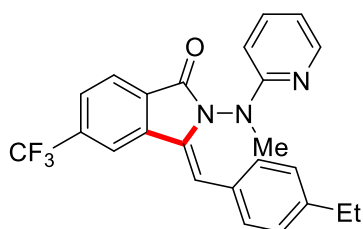

**(Z)-3-(4-Ethylbenzylidene)-2-(methyl[pyridin-2-yl]amino)-5-(trifluoromethyl)isoindolin-1-one (3cd)**

The general procedure was followed using hydrazide **1c** (88.6 mg, 0.30 mmol) and alkyne **2d** (117.2 mg, 0.90 mmol). Purification by column chromatography on silica gel (petroleum/EtOAc 10:1) yielded **3cd** (115.6 mg, 91%) as a light yellow solid. mp 119–120 °C. **<sup>1</sup>H NMR** (600 MHz, CDCl<sub>3</sub>)  $\delta$  = 8.14 (ddd,  $J$  = 5.0, 1.9, 0.9 Hz, 1H), 8.08 (s, 1H), 8.01 (d,  $J$  = 8.0 Hz, 1H), 7.78 (dd,  $J$  = 8.0, 0.9 Hz, 1H), 7.45 (ddd,  $J$  = 8.5, 7.2, 1.9 Hz, 1H), 7.05 (d,  $J$  = 7.5 Hz, 2H), 6.94 – 6.90 (m, 3H), 6.69 (ddd,  $J$  = 7.1, 5.0, 0.9 Hz, 1H), 6.40 (d,  $J$  = 8.5 Hz, 1H), 3.04 (s, 3H), 2.56 (q,  $J$  = 7.6 Hz, 2H), 1.16 (t,  $J$  = 7.6 Hz, 3H). **<sup>13</sup>C NMR** (150 MHz, CDCl<sub>3</sub>)  $\delta$  = 164.5 (C<sub>q</sub>), 157.3 (C<sub>q</sub>), 147.9 (CH), 144.0 (C<sub>q</sub>), 137.6 (CH), 136.7 (C<sub>q</sub>), 134.6 (q,  $^2J_{C-F}$  = 32.5 Hz, C<sub>q</sub>), 130.8 (C<sub>q</sub>), 129.8 (C<sub>q</sub>), 129.2 (C<sub>q</sub>), 129.0 (CH), 126.9 (CH), 125.8 (q,  $^3J_{C-F}$  = 3.7 Hz, CH), 124.5 (CH), 123.6 (q,  $^1J_{C-F}$  = 273.0 Hz, C<sub>q</sub>), 117.2 (q,  $^3J_{C-F}$  = 4.0 Hz, CH), 114.6 (CH), 110.1 (CH), 106.4 (CH), 36.9 (CH<sub>3</sub>), 28.5 (CH<sub>2</sub>), 15.4 (CH<sub>3</sub>). **<sup>19</sup>F NMR** (565 MHz, CDCl<sub>3</sub>)  $\delta$  = -62.48 (s, 3F). **HR-MS** (ESI)  $m/z$  calcd for C<sub>24</sub>H<sub>21</sub>F<sub>3</sub>N<sub>3</sub>O [M+H<sup>+</sup>] 424.1631, found 424.1627.

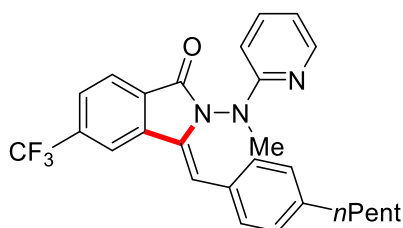

**(Z)-2-(Methyl[pyridin-2-yl]amino)-3-(4-pentylbenzylidene)-5-(trifluoromethyl)isoindolin-1-one (3ce)**

The general procedure was followed using hydrazide **1c** (88.6 mg, 0.30 mmol) and alkyne **2e** (155.1 mg, 0.90 mmol). Purification by column chromatography on silica gel (petroleum/EtOAc 10:1) yielded **3ce** (135.5 mg, 97%) as a light yellow solid. mp 71–72 °C. **<sup>1</sup>H NMR** (600 MHz, CDCl<sub>3</sub>)  $\delta$  = 8.14 (ddd,  $J$  = 5.0, 1.9, 0.9 Hz, 1H), 8.08 (s,

1H), 8.01 (d,  $J = 7.9$  Hz, 1H), 7.78 (d,  $J = 8.1$  Hz, 1H), 7.44 (ddd,  $J = 8.4, 7.2, 1.9$  Hz, 1H), 7.04 (d,  $J = 8.4$  Hz, 2H), 6.93–6.88 (m, 3H), 6.72–6.67 (m, 1H), 6.38 (d,  $J = 8.5$  Hz, 1H), 3.04 (s, 3H), 2.51 (t,  $J = 7.7$  Hz, 2H), 1.53 (dtd,  $J = 9.0, 7.5, 6.2$  Hz, 2H), 1.37–1.20 (m, 4H), 0.88 (t,  $J = 7.2$  Hz, 3H).  **$^{13}\text{C}$  NMR** (150 MHz,  $\text{CDCl}_3$ )  $\delta = 164.5$  ( $\text{C}_\text{q}$ ), 157.3 ( $\text{C}_\text{q}$ ), 147.9 (CH), 142.7 ( $\text{C}_\text{q}$ ), 137.5 (CH), 136.7 ( $\text{C}_\text{q}$ ), 134.6 (q,  $^2J_{\text{C-F}} = 32.6$  Hz,  $\text{C}_\text{q}$ ), 130.9 ( $\text{C}_\text{q}$ ), 129.8 ( $\text{C}_\text{q}$ ), 129.2 ( $\text{C}_\text{q}$ ), 128.9 (CH), 127.5 (CH), 125.8 (q,  $^3J_{\text{C-F}} = 4.1$  Hz, CH), 124.5 (CH), 123.6 (q,  $^1J_{\text{C-F}} = 273.1$  Hz,  $\text{C}_\text{q}$ ), 117.2 (q,  $^3J_{\text{C-F}} = 4.0$  Hz, CH), 114.6 (CH), 110.1 (CH), 106.3 (CH), 36.9 ( $\text{CH}_3$ ), 35.6 ( $\text{CH}_2$ ), 31.3 ( $\text{CH}_2$ ), 30.9 ( $\text{CH}_2$ ), 22.5 ( $\text{CH}_2$ ), 14.0 ( $\text{CH}_3$ ).  **$^{19}\text{F}$  NMR** (565 MHz,  $\text{CDCl}_3$ )  $\delta = -62.48$  (s, 3F). **HR-MS** (ESI)  $m/z$  calcd for  $\text{C}_{27}\text{H}_{27}\text{F}_3\text{N}_3\text{O}$  [ $\text{M}+\text{H}^+$ ] 466.2101, found 466.2097.

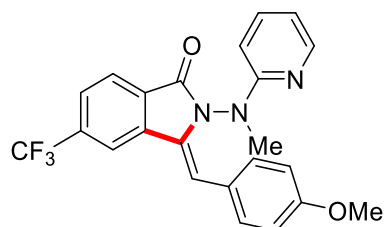

**(Z)-3-(4-Methoxybenzylidene)-2-(methyl[pyridin-2-yl]amino)-5-(trifluoromethyl)isoindolin-1-one (3cf)**

The general procedure was followed using hydrazide **1c** (88.6 mg, 0.30 mmol) and alkyne **2f** (118.9 mg, 0.90 mmol). Purification by column chromatography on silica gel (petroleum/EtOAc 10:1) yielded **3cf** (126.3 mg, 99%,  $Z/E = 10:1$ ) as a light yellow solid. mp 122–123 °C.  **$^1\text{H}$  NMR** (600 MHz,  $\text{CDCl}_3$ )  $\delta = 8.19$ – $8.15$  (m, 1H), 8.07 (s, 1H), 8.00 (dd,  $J = 7.9, 0.8$  Hz, 1H), 7.78 (d,  $J = 1.4$  Hz, 1H), 7.47 (ddd,  $J = 8.8, 7.1, 1.8$  Hz, 1H), 7.10 (d,  $J = 9.0$  Hz, 2H), 6.88 (s, 1H), 6.74–6.69 (m, 1H), 6.63 (d,  $J = 8.8$  Hz, 2H), 6.45 (d,  $J = 8.5$  Hz, 1H), 3.74 (s, 3H), 3.07 (s, 3H).  **$^{13}\text{C}$  NMR** (150 MHz,  $\text{CDCl}_3$ )  $\delta = 164.5$  ( $\text{C}_\text{q}$ ), 159.3 ( $\text{C}_\text{q}$ ), 157.5 ( $\text{C}_\text{q}$ ), 147.9 (CH), 137.7 (CH), 136.8 ( $\text{C}_\text{q}$ ), 134.6 (q,  $^2J_{\text{C-F}} = 32.8$  Hz,  $\text{C}_\text{q}$ ), 130.6 (CH), 130.3 ( $\text{C}_\text{q}$ ), 129.0 ( $\text{C}_\text{q}$ ), 125.7 (q,  $^3J_{\text{C-F}} = 3.7$  Hz, CH), 124.9 ( $\text{C}_\text{q}$ ), 124.5 (CH), 123.7 (q,  $^1J_{\text{C-F}} = 271.5$  Hz,  $\text{C}_\text{q}$ ), 117.1 (q,  $^3J_{\text{C-F}} = 4.2$  Hz, CH), 114.8 (CH), 113.0 (CH), 110.0 (CH), 106.5 (CH), 55.2 ( $\text{CH}_3$ ), 36.9 ( $\text{CH}_3$ ).  **$^{19}\text{F}$  NMR**

(565 MHz, CDCl<sub>3</sub>)  $\delta$  = -62.51 (s, 3F). **HR-MS** (ESI)  $m/z$  calcd for C<sub>23</sub>H<sub>19</sub>F<sub>3</sub>N<sub>3</sub>O<sub>2</sub> [M+H<sup>+</sup>] 426.1424, found 426.1421.

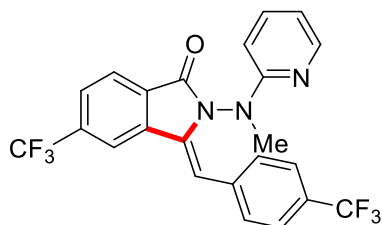

**(Z)-2-(Methyl[pyridin-2-yl]amino)-5-(trifluoromethyl)-3-(4-(trifluoromethyl)benzylidene)isoindolin-1-one (3cg)**

The general procedure was followed using hydrazide **1c** (88.6 mg, 0.30 mmol) and alkyne **2g** (153.1 mg, 0.90 mmol). Purification by column chromatography on silica gel (petroleum/EtOAc 10:1) yielded **3cg** (66.4 mg, 52%) as a light yellow solid. mp 153–154 °C. **<sup>1</sup>H NMR** (600 MHz, CDCl<sub>3</sub>)  $\delta$  = 8.12–8.10 (m, 1H), 8.09 (s, 1H), 8.02 (d,  $J$  = 7.2 Hz, 1H), 7.84–7.81 (m, 1H), 7.45 (ddd,  $J$  = 8.8, 7.2, 1.9 Hz, 1H), 7.33 (d,  $J$  = 8.0 Hz, 2H), 7.22–7.18 (m, 2H), 6.87 (s, 1H), 6.74–6.68 (m, 1H), 6.34 (d,  $J$  = 8.5 Hz, 1H), 3.02 (s, 3H). **<sup>13</sup>C NMR** (150 MHz, CDCl<sub>3</sub>)  $\delta$  = 164.5 (C<sub>q</sub>), 156.9 (C<sub>q</sub>), 148.1 (CH), 137.7 (CH), 136.7 (C<sub>q</sub>), 136.2 (C<sub>q</sub>), 134.9 (q,  $^2J_{C-F}$  = 32.9 Hz, C<sub>q</sub>), 132.7 (C<sub>q</sub>), 129.5 (C<sub>q</sub>), 129.4 (q,  $^2J_{C-F}$  = 32.7 Hz, C<sub>q</sub>), 129.0 (CH), 126.5 (q,  $^3J_{C-F}$  = 3.6 Hz, CH), 124.6 (CH), 124.2 (q,  $^3J_{C-F}$  = 3.7 Hz, CH), 123.9 (q,  $^1J_{C-F}$  = 271.7 Hz, C<sub>q</sub>), 123.5 (q,  $^1J_{C-F}$  = 273.1 Hz, C<sub>q</sub>), 117.4 (q,  $^3J_{C-F}$  = 4.1 Hz, CH), 115.1 (CH), 107.3 (CH), 106.2 (CH), 37.1 (CH<sub>3</sub>). **<sup>19</sup>F NMR** (565 MHz, CDCl<sub>3</sub>)  $\delta$  = -62.55 (s, 3F), -62.55 (s, 3F). **HR-MS** (ESI)  $m/z$  calcd for C<sub>23</sub>H<sub>16</sub>F<sub>6</sub>N<sub>3</sub>O [M+H<sup>+</sup>] 464.1192, found 464.1189.

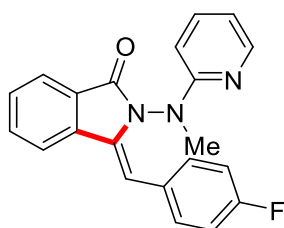

**(Z)-3-(4-Fluorobenzylidene)-2-(methyl[pyridin-2-yl]amino)isoindolin-1-one (3ah)**

The general procedure was followed using hydrazide **1a** (68.2 mg, 0.30 mmol) and

alkyne **2h** (108.1 mg, 0.90 mmol). Purification by column chromatography on silica gel (petroleum/EtOAc 10:1) yielded **3ah** (89.1 mg, 86%, *Z/E* = 14:1) as a light yellow solid. mp 101–102 °C. <sup>1</sup>H NMR (600 MHz, CDCl<sub>3</sub>)  $\delta$  = 8.14 (ddd, *J* = 5.0, 1.9, 0.9 Hz, 1H), 7.88 (d, *J* = 7.6 Hz, 1H), 7.81 (d, *J* = 7.8 Hz, 1H), 7.69 (dd, *J* = 7.6, 1.1 Hz, 1H), 7.55 (dd, *J* = 7.5, 0.9 Hz, 1H), 7.44 (ddd, *J* = 8.5, 7.1, 1.9 Hz, 1H), 7.08–7.05 (m, 2H), 6.78–6.73 (m, 3H), 6.69 – 6.66 (m, 1H), 6.42 (d, *J* = 8.5 Hz, 1H), 3.02 (s, 3H). <sup>13</sup>C NMR (150 MHz, CDCl<sub>3</sub>)  $\delta$  = 165.7 (C<sub>q</sub>), 162.0 (d, <sup>1</sup>*J*<sub>C-F</sub> = 247.0 Hz, C<sub>q</sub>), 157.5 (C<sub>q</sub>), 147.9 (CH), 137.5 (CH), 136.2 (C<sub>q</sub>), 132.9 (CH), 132.3 (C<sub>q</sub>), 130.5 (d, <sup>3</sup>*J*<sub>C-F</sub> = 8.0 Hz, CH), 129.4 (CH), 129.2 (d, <sup>4</sup>*J*<sub>C-F</sub> = 3.4 Hz, C<sub>q</sub>), 126.5 (C<sub>q</sub>), 123.8 (CH), 119.8 (CH), 114.5 (CH), 114.3 (d, <sup>2</sup>*J*<sub>C-F</sub> = 21.5 Hz, CH), 106.5 (CH), 106.4 (CH), 36.7 (CH<sub>3</sub>). <sup>19</sup>F NMR (565 MHz, CDCl<sub>3</sub>)  $\delta$  = – (113.98–114.03, m, 1F). HR-MS (ESI) *m/z* calcd for C<sub>21</sub>H<sub>17</sub>FN<sub>3</sub>O [M+H<sup>+</sup>] 346.1350, found 346.1347.

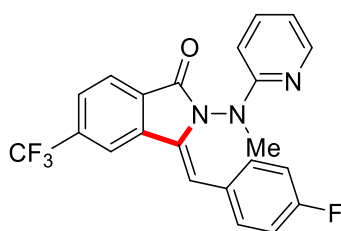

**(Z)-3-(4-Fluorobenzylidene)-2-(methyl[pyridin-2-yl]amino]-5-(trifluoromethyl)isoindolin-1-one (3ch)**

The general procedure was followed using hydrazide **1c** (88.6 mg, 0.30 mmol) and alkyne **2h** (108.1 mg, 0.90 mmol). Purification by column chromatography on silica gel (petroleum/EtOAc 10:1) yielded **3ch** (33.5 mg, 27%) as a light yellow solid. mp 133–134 °C. <sup>1</sup>H NMR (600 MHz, CDCl<sub>3</sub>)  $\delta$  = 8.17–8.13 (m, 1H), 8.08 (s, 1H), 8.01 (d, *J* = 7.9 Hz, 1H), 7.80 (d, *J* = 7.9 Hz, 1H), 7.46 (ddd, *J* = 8.7, 7.0, 1.9 Hz, 1H), 7.08 (dd, *J* = 8.5, 5.5 Hz, 2H), 6.86 (s, 1H), 6.78 (d, *J* = 8.6 Hz, 2H), 6.71 (dd, *J* = 7.2, 5.0 Hz, 1H), 6.39 (d, *J* = 8.5 Hz, 1H), 3.03 (s, 3H). <sup>13</sup>C NMR (151 MHz, CDCl<sub>3</sub>)  $\delta$  = 164.5 (C<sub>q</sub>), 162.2 (d, <sup>1</sup>*J*<sub>C-F</sub> = 248.2 Hz, C<sub>q</sub>), 157.2 (C<sub>q</sub>), 148.0 (CH), 137.7 (CH), 136.4 (C<sub>q</sub>), 134.7 (q, <sup>2</sup>*J*<sub>C-F</sub> = 32.8 Hz, C<sub>q</sub>), 131.6 (C<sub>q</sub>), 130.6 (d, <sup>3</sup>*J*<sub>C-F</sub> = 8.0 Hz, CH), 129.3 (C<sub>q</sub>), 128.7 (d, <sup>4</sup>*J*<sub>C-F</sub> = 3.5 Hz, C<sub>q</sub>), 126.1 (q, <sup>3</sup>*J*<sub>C-F</sub> = 3.6 Hz, CH), 124.6 (CH), 123.6 (q, <sup>1</sup>*J*<sub>C-F</sub> = 273.2 Hz, C<sub>q</sub>), 117.3 (q, <sup>3</sup>*J*<sub>C-F</sub> = 4.1 Hz, CH), 114.9 (CH), 114.5 (d, <sup>2</sup>*J*<sub>C-F</sub> = 21.6 Hz, CH), 108.4

(CH), 106.3 (CH), 37.0 (CH<sub>3</sub>). **<sup>19</sup>F NMR** (565 MHz, CDCl<sub>3</sub>)  $\delta$  = -62.53 (s, 3F), -113.34 (p,  $J$  = 6.2 Hz, 1F). **HR-MS** (ESI)  $m/z$  calcd for C<sub>22</sub>H<sub>16</sub>F<sub>4</sub>N<sub>3</sub>O [M+H<sup>+</sup>] 414.1224, found 414.1219.

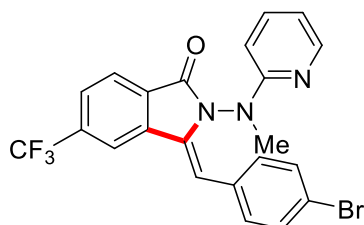

**(Z)-3-(4-Bromobenzylidene)-2-(methyl[pyridin-2-yl]amino)-5-(trifluoromethyl)isoindolin-1-one (3ci)**

The general procedure was followed using hydrazide **1c** (88.6 mg, 0.30 mmol) and alkyne **2i** (162.9 mg, 0.90 mmol). Purification by column chromatography on silica gel (petroleum/EtOAc 10:1) yielded **3ci** (44.1 mg, 31%) as a light yellow solid. mp 170–171 °C. **<sup>1</sup>H NMR** (600 MHz, CDCl<sub>3</sub>)  $\delta$  = 8.16 (ddd,  $J$  = 5.0, 1.9, 0.9 Hz, 1H), 8.07 (s, 1H), 8.01 (dd,  $J$  = 7.9, 0.8 Hz, 1H), 7.81 (dd,  $J$  = 8.0, 0.9 Hz, 1H), 7.51–7.44 (m, 1H), 7.24–7.18 (m, 2H), 6.98 (dd,  $J$  = 8.6, 0.8 Hz, 2H), 6.80 (s, 1H), 6.72 (ddd,  $J$  = 7.2, 5.0, 0.9 Hz, 1H), 6.39 (dd,  $J$  = 8.5, 0.9 Hz, 1H), 3.04 (s, 3H). **<sup>13</sup>C NMR** (151 MHz, CDCl<sub>3</sub>)  $\delta$  = 164.5 (C<sub>q</sub>), 157.1 (C<sub>q</sub>), 148.1 (CH), 137.7 (CH), 136.4 (C<sub>q</sub>), 134.8 (q,  $^2J_{C-F}$  = 32.5 Hz, C<sub>q</sub>), 131.9 (C<sub>q</sub>), 131.7 (C<sub>q</sub>), 130.5 (CH), 130.5 (CH), 129.4 (C<sub>q</sub>), 126.3 (q,  $^3J_{C-F}$  = 4.1 Hz, CH), 124.6 (CH), 123.6 (q,  $^1J_{C-F}$  = 273.6 Hz, C<sub>q</sub>), 121.9 (C<sub>q</sub>), 117.3 (q,  $^3J_{C-F}$  = 4.0 Hz, CH), 115.0 (CH), 108.0 (CH), 106.3 (CH), 37.1 (CH<sub>3</sub>). **<sup>19</sup>F NMR** (565 MHz, CDCl<sub>3</sub>)  $\delta$  = -62.53 (s, 3F). **HR-MS** (ESI)  $m/z$  calcd for C<sub>22</sub>H<sub>16</sub><sup>79</sup>BrF<sub>3</sub>N<sub>3</sub>O [M+H<sup>+</sup>] 474.0423, found 474.0420.

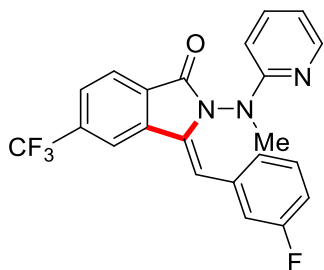

**(Z)-3-(3-Fluorobenzylidene)-2-(methyl[pyridin-2-yl]amino)-5-(trifluoromethyl)isoindolin-1-one (3cj)**

The general procedure was followed using hydrazide **1c** (88.6 mg, 0.30 mmol) and alkyne **2j** (108.1 mg, 0.90 mmol). Purification by column chromatography on silica gel (petroleum/EtOAc 10:1) yielded **3cj** (69.4 mg, 56%) as a light yellow solid. mp 147–148 °C. **<sup>1</sup>H NMR** (600 MHz, CDCl<sub>3</sub>)  $\delta$  = 8.15–8.12 (m, 1H), 8.08 (s, 1H), 8.02 (d,  $J$  = 7.9 Hz, 1H), 7.82 (dd,  $J$  = 7.9, 1.5 Hz, 1H), 7.46 (ddd,  $J$  = 8.8, 7.2, 1.9 Hz, 1H), 7.06 (dd,  $J$  = 8.0, 5.9 Hz, 1H), 6.90–6.83 (m, 3H), 6.78 (dd,  $J$  = 9.9, 2.2 Hz, 1H), 6.71 (ddd,  $J$  = 7.2, 5.0, 0.9 Hz, 1H), 6.37 (d,  $J$  = 8.8 Hz, 1H), 3.05 (s, 3H). **<sup>13</sup>C NMR** (150 MHz, CDCl<sub>3</sub>)  $\delta$  = 164.5 (C<sub>q</sub>), 161.8 (d,  $^1J_{C-F}$  = 246.3 Hz, C<sub>q</sub>), 157.0 (C<sub>q</sub>), 148.0 (CH), 137.7 (CH), 136.3 (C<sub>q</sub>), 135.0 (d,  $^3J_{C-F}$  = 8.1 Hz, C<sub>q</sub>), 134.8 (q,  $^2J_{C-F}$  = 33.1 Hz, C<sub>q</sub>), 132.3 (C<sub>q</sub>), 129.5 (C<sub>q</sub>), 128.9 (d,  $^3J_{C-F}$  = 8.5 Hz, CH), 126.4 (q,  $^3J_{C-F}$  = 3.7 Hz, CH), 124.6 (CH), 124.6 (d,  $^4J_{C-F}$  = 2.9 Hz, CH), 123.6 (q,  $^1J_{C-F}$  = 273.4 Hz, C<sub>q</sub>), 117.4 (q,  $^3J_{C-F}$  = 4.0 Hz, CH), 117.3, 115.7 (d,  $^2J_{C-F}$  = 22.3 Hz, CH), 114.9 (CH), 114.6 (d,  $^2J_{C-F}$  = 20.9 Hz, CH), 107.8 (CH), 106.2 (CH), 37.1 (CH<sub>3</sub>). **<sup>19</sup>F NMR** (565 MHz, CDCl<sub>3</sub>)  $\delta$  = -62.54 (s, 3F), -113.76 (td,  $J$  = 9.3, 6.2 Hz, 1F). **HR-MS** (ESI)  $m/z$  calcd for C<sub>22</sub>H<sub>16</sub>F<sub>4</sub>N<sub>3</sub>O [M+H<sup>+</sup>] 414.1224, found 414.1222.

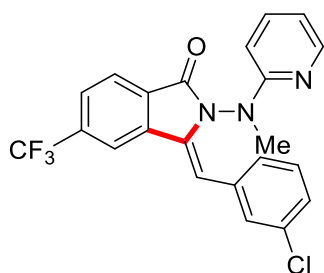

**(Z)-3-(3-Chlorobenzylidene)-2-(methyl[pyridin-2-yl]amino)-5-(trifluoromethyl)isoindolin-1-one (3ck)**

The general procedure was followed using hydrazide **1c** (88.6 mg, 0.30 mmol) and alkyne **2k** (122.9 mg, 0.90 mmol). Purification by column chromatography on silica gel (petroleum/EtOAc 10:1) yielded **3ck** (114.7 mg, 89%) as a light yellow solid. mp 131–132 °C. **<sup>1</sup>H NMR** (600 MHz, CDCl<sub>3</sub>)  $\delta$  = 8.14 (ddd,  $J$  = 5.0, 1.8, 0.9 Hz, 1H), 8.07 (s, 1H), 8.02 (d,  $J$  = 7.9 Hz, 1H), 7.82 (d,  $J$  = 9.3 Hz, 1H), 7.47 (ddd,  $J$  = 8.7, 7.1, 1.8 Hz, 1H), 7.16–7.11 (m, 1H), 7.07–7.02 (m, 2H), 7.01–6.98 (m, 1H), 6.82 (s, 1H), 6.71 (dd,  $J$  = 7.2, 5.0 Hz, 1H), 6.38 (dd,  $J$  = 8.5, 1.0 Hz, 1H), 3.04 (s, 3H). **<sup>13</sup>C NMR** (150 MHz, CDCl<sub>3</sub>)  $\delta$  = 164.5 (C<sub>q</sub>), 156.9 (C<sub>q</sub>), 148.1 (CH), 137.8 (CH), 136.3 (C<sub>q</sub>), 134.8 (q,  $^2J_{C-F}$  = 32.3 Hz, C<sub>q</sub>), 134.9 (C<sub>q</sub>), 132.4 (C<sub>q</sub>), 131.9 (CH), 130.6 (CH), 129.4 (C<sub>q</sub>), 128.9 (CH), 127.2 (CH), 126.4 (q,  $^3J_{C-F}$  = 3.8 Hz, CH), 124.6 (CH), 123.6 (q,  $^1J_{C-F}$  = 273.1 Hz, C<sub>q</sub>), 121.3 (C<sub>q</sub>), 117.4 (q,  $^3J_{C-F}$  = 3.7, 3.2 Hz, CH), 115.1 (CH), 107.4 (CH), 106.2 (CH), 37.0 (CH<sub>3</sub>). **<sup>19</sup>F NMR** (565 MHz, CDCl<sub>3</sub>)  $\delta$  = -62.53 (s, 3F). **HR-MS** (ESI)  $m/z$  calcd for C<sub>22</sub>H<sub>16</sub><sup>35</sup>ClF<sub>3</sub>N<sub>3</sub>O [M+H<sup>+</sup>] 430.0929, found 430.0928.

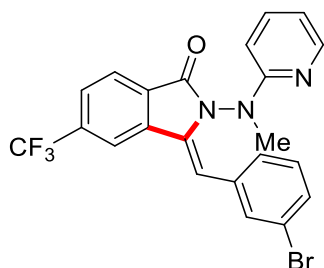

**(Z)-3-(3-Bromobenzylidene)-2-(methyl(pyridin-2-yl)amino)-5-(trifluoromethyl)isoindolin-1-one (3cl)**

The general procedure was followed using hydrazide **1c** (88.6 mg, 0.30 mmol) and alkyne **2l** (162.9 mg, 0.90 mmol). Purification by column chromatography on silica gel (petroleum/EtOAc 10:1) yielded **3cl** (98.2 mg, 69%) as a light yellow solid. mp 135–136 °C. **<sup>1</sup>H NMR** (600 MHz, CDCl<sub>3</sub>)  $\delta$  = 8.17–8.13 (m, 1H), 8.07 (s, 1H), 8.02 (d,  $J$  = 7.9 Hz, 1H), 7.82 (d,  $J$  = 7.9 Hz, 1H), 7.50–7.45 (m, 1H), 7.28 (dd,  $J$  = 7.9, 1.0 Hz, 1H), 7.24 (s, 1H), 7.05 (d,  $J$  = 6.8 Hz, 1H), 7.02–6.97 (m, 1H), 6.81 (s, 1H), 6.72 (ddd,  $J$  = 7.2, 5.0, 1.0 Hz, 1H), 6.39 (dd,  $J$  = 8.4, 1.0 Hz, 1H), 3.04 (s, 3H). **<sup>13</sup>C NMR** (150 MHz, CDCl<sub>3</sub>)  $\delta$  = 164.5 (C<sub>q</sub>), 156.9 (C<sub>q</sub>), 148.1 (CH), 137.8 (CH), 136.3 (C<sub>q</sub>), 134.8 (q,  $^2J_{C-F}$  = 32.3 Hz, C<sub>q</sub>), 134.9 (C<sub>q</sub>), 132.4 (C<sub>q</sub>), 131.9 (CH), 130.6 (CH), 129.4 (C<sub>q</sub>), 128.9 (CH), 127.2 (CH), 126.4 (q,  $^3J_{C-F}$  = 3.8 Hz, CH), 124.6 (CH), 123.6 (q,  $^1J_{C-F}$  = 273.1 Hz, C<sub>q</sub>), 121.3 (C<sub>q</sub>), 117.4 (q,  $^3J_{C-F}$  = 3.7, 3.2 Hz, CH), 115.1 (CH), 107.4 (CH), 106.2 (CH), 37.0 (CH<sub>3</sub>). **<sup>19</sup>F NMR** (565 MHz, CDCl<sub>3</sub>)  $\delta$  = -62.53 (s, 3F). **HR-MS** (ESI)  $m/z$  calcd for C<sub>22</sub>H<sub>16</sub><sup>79</sup>BrF<sub>3</sub>N<sub>3</sub>O [M+H<sup>+</sup>] 474.0423, found 474.0424.

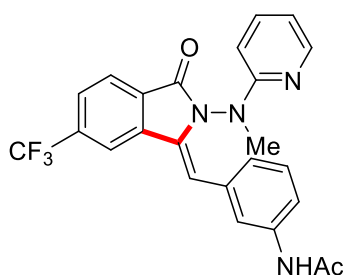

**(Z)-N-[3-[(2-{Methyl[pyridin-2-yl]amino}-3-oxo-6-(trifluoromethyl)isoindolin-1-ylidene)methyl]phenyl]acetamide (3cm)**

The general procedure was followed using hydrazide **1c** (88.6 mg, 0.30 mmol) and



alkyne **2m** (143.3 mg, 0.90 mmol). Purification by column chromatography on silica gel (petroleum/EtOAc 10:1) yielded **3cm** (99.1 mg, 73%) as a light yellow solid. mp 75–76 °C. **<sup>1</sup>H NMR** (600 MHz, CDCl<sub>3</sub>)  $\delta$  = 8.14 (dd,  $J$  = 5.2, 1.8 Hz, 1H), 8.04 (s, 1H), 7.99 (d,  $J$  = 7.9 Hz, 1H), 7.78 (d,  $J$  = 8.0 Hz, 1H), 7.48 (ddd,  $J$  = 8.7, 7.2, 1.9 Hz, 1H), 7.38–7.33 (m, 1H), 7.14 (s, 1H), 7.10 (s, 1H), 7.04 (dd,  $J$  = 7.9, 7.9 Hz, 1H), 7.86 (s, 1H), 6.85 (d,  $J$  = 8.7 Hz, 1H), 6.71 (dd,  $J$  = 7.1, 5.0 Hz, 1H), 6.42 (d,  $J$  = 8.5 Hz, 1H), 2.96 (s, 3H), 2.00 (s, 3H). **<sup>13</sup>C NMR** (150 MHz, CDCl<sub>3</sub>)  $\delta$  = 168.1 (C<sub>q</sub>), 164.5 (C<sub>q</sub>), 157.3 (C<sub>q</sub>), 147.9 (CH), 137.8 (CH), 137.1 (C<sub>q</sub>), 136.5 (C<sub>q</sub>), 134.8 (q,  $^2J_{C-F}$  = 32.7 Hz, C<sub>q</sub>), 133.2 (C<sub>q</sub>), 131.4 (C<sub>q</sub>), 129.1 (C<sub>q</sub>), 128.1 (CH), 126.1 (q,  $^3J_{C-F}$  = 3.8 Hz, CH), 124.5 (CH), 124.4 (CH), 123.5 (q,  $^1J_{C-F}$  = 272.9 Hz, C<sub>q</sub>), 120.5 (CH), 119.2 (CH), 117.3 (q,  $^3J_{C-F}$  = 4.1 Hz, CH), 114.5 (CH), 109.2 (CH), 106.5 (CH), 36.8 (CH<sub>3</sub>), 24.4 (CH<sub>3</sub>). **<sup>19</sup>F NMR** (565 MHz, CDCl<sub>3</sub>)  $\delta$  = -62.51 (s, 3F). **HR-MS** (ESI)  $m/z$  calcd for C<sub>24</sub>H<sub>20</sub>F<sub>3</sub>N<sub>4</sub>O<sub>2</sub> [M+H<sup>+</sup>] 453.1533, found 453.1533.

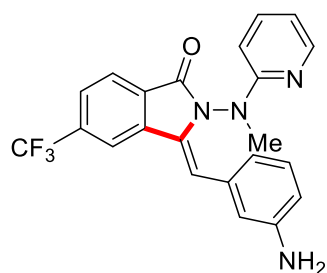

**(Z)-3-(3-Aminobenzylidene)-2-(methyl[pyridin-2-yl]amino)-5-(trifluoromethyl)isoindolin-1-one (3cn)**

The general procedure was followed using hydrazide **1c** (88.6 mg, 0.30 mmol) and alkyne **2n** (105.4 mg, 0.90 mmol). Purification by column chromatography on silica gel (petroleum/EtOAc 10:1) yielded **3cn** (91.1 mg, 74%) as a light yellow solid. mp 115–116 °C. **<sup>1</sup>H NMR** (600 MHz, CDCl<sub>3</sub>)  $\delta$  = 8.19 (d,  $J$  = 5.0 Hz, 1H), 8.07 (s, 1H), 8.02 (d,  $J$  = 7.9 Hz, 1H), 7.79 (d,  $J$  = 7.9 Hz, 1H), 7.49 (ddd,  $J$  = 8.8, 7.1, 1.8 Hz, 1H), 6.94 (dd,  $J$  = 7.8, 7.8 Hz, 1H), 6.86 (s, 1H), 6.75–6.68 (m, 1H), 6.56 (d,  $J$  = 7.5 Hz, 1H), 6.50 (d,  $J$  = 8.2 Hz, 1H), 6.45 (d,  $J$  = 8.5 Hz, 1H), 6.32 (s, 1H), 3.24 (s<sub>br</sub>, 2H), 3.01 (s, 3H). **<sup>13</sup>C NMR** (150 MHz, CDCl<sub>3</sub>)  $\delta$  = 164.6 (C<sub>q</sub>), 157.4 (C<sub>q</sub>), 148.0 (CH), 145.4 (C<sub>q</sub>), 137.7 (CH), 136.7 (C<sub>q</sub>), 134.7 (q,  $^2J_{C-F}$  = 32.6 Hz, C<sub>q</sub>), 133.5 (C<sub>q</sub>), 131.0 (C<sub>q</sub>), 129.2 (C<sub>q</sub>), 128.4 (CH), 126.0 (q,  $^3J_{C-F}$  = 3.6 Hz, CH), 124.5 (CH), 123.6 (q,  $^1J_{C-F}$  = 273.5 Hz, C<sub>q</sub>),

119.2 (CH), 117.2 (q,  $^3J_{\text{C-F}} = 4.2$  Hz, CH), 116.0 (CH), 114.7 (CH), 114.4 (CH), 110.1 (CH), 106.3 (CH), 36.8 (CH<sub>3</sub>).  **$^{19}\text{F}$  NMR** (565 MHz, CDCl<sub>3</sub>)  $\delta = -62.50$  (s, 3F). **HR-MS** (ESI)  $m/z$  calcd for C<sub>22</sub>H<sub>18</sub>F<sub>3</sub>N<sub>4</sub>O [M+H<sup>+</sup>] 411.1427, found 411.1425.

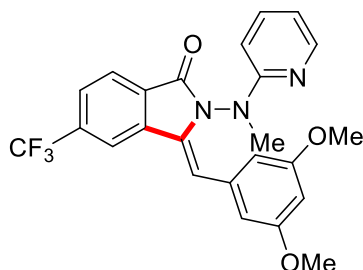

**(Z)-3-(3,5-Dimethoxybenzylidene)-2-(methyl[pyridin-2-yl]amino)-5-(trifluoromethyl)isoindolin-1-one (3co)**

The general procedure was followed using hydrazide **1c** (88.6 mg, 0.30 mmol) and alkyne **2o** (146.0 mg, 0.90 mmol). Purification by column chromatography on silica gel (petroleum/EtOAc 10:1) yielded **3co** (128.4 mg, 94%, *Z/E* = 12:1) as a light yellow solid. mp 115–116 °C.  **$^1\text{H}$  NMR** (600 MHz, CDCl<sub>3</sub>)  $\delta$  = 8.16 (dd,  $J = 5.0, 1.0$  Hz, 1H), 8.07 (s, 1H), 8.00 (d,  $J = 7.9$  Hz, 1H), 7.79 (d,  $J = 7.5$  Hz, 1H), 7.46 (ddd,  $J = 8.8, 7.2, 1.9$  Hz, 1H), 6.86 (s, 1H), 6.70 (ddd,  $J = 7.2, 5.0, 0.9$  Hz, 1H), 6.45 (d,  $J = 8.5$  Hz, 1H), 6.30–6.29 (m, 3H), 3.46 (s, 6H), 3.05 (s, 3H).  **$^{13}\text{C}$  NMR** (150 MHz, CDCl<sub>3</sub>)  $\delta$  = 164.4 (C<sub>q</sub>), 159.9 (C<sub>q</sub>), 157.4 (C<sub>q</sub>), 148.1 (CH), 137.7 (CH), 136.5 (C<sub>q</sub>), 134.7 (C<sub>q</sub>), 134.7 (q,  $^3J_{\text{C-F}} = 32.4$  Hz, C<sub>q</sub>), 131.5 (C<sub>q</sub>), 129.3 (C<sub>q</sub>), 126.1 (q,  $^3J_{\text{C-F}} = 3.7$  Hz, CH), 124.5 (CH), 123.6 (q,  $^1J_{\text{C-F}} = 273.4$  Hz, C<sub>q</sub>), 117.3 (q,  $^3J_{\text{C-F}} = 4.3$  Hz, CH), 114.8 (CH), 109.5 (CH), 106.7 (CH), 106.5 (CH), 100.6 (CH), 55.0 (CH<sub>3</sub>), 37.0 (CH<sub>3</sub>).  **$^{19}\text{F}$  NMR** (565 MHz, CDCl<sub>3</sub>)  $\delta = -62.51$  (s, 3F). **HR-MS** (ESI)  $m/z$  calcd for C<sub>24</sub>H<sub>21</sub>F<sub>3</sub>N<sub>3</sub>O<sub>3</sub> [M+H<sup>+</sup>] 456.1530, found 456.1529.

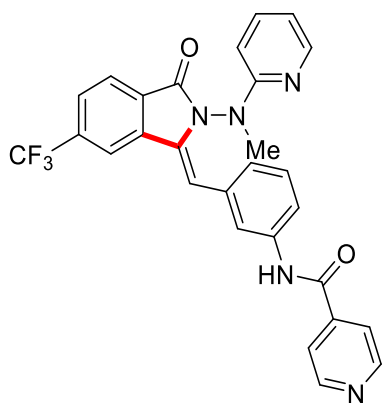

**(Z)-N-{3-((2-[Methyl(pyridin-2-yl)amino]-3-oxo-6-(trifluoromethyl)isoindolin-1-ylidene)methyl)phenyl}isonicotinamide (**3cp**)**

The general procedure was followed using hydrazide **1c** (88.6 mg, 0.30 mmol) and alkyne **2p** (200.0 mg, 0.90 mmol). Purification by column chromatography on silica gel (petroleum/EtOAc 10:1) yielded **3cp** (136.1 mg, 88%) as a light yellow solid. mp 70–71 °C. **<sup>1</sup>H NMR** (600 MHz, CDCl<sub>3</sub>)  $\delta$  = 8.77–8.71 (m, 2H), 8.12–8.05 (m, 2H), 7.99 (d,  $J$  = 7.2 Hz, 1H), 7.79 (d,  $J$  = 8.0 Hz, 1H), 7.70 (s, 1H), 7.59–7.55 (m, 2H), 7.52 (d,  $J$  = 8.1 Hz, 1H), 7.42 (ddd,  $J$  = 8.7, 7.1, 1.9 Hz, 1H), 7.27 (s, 1H), 7.15 (t,  $J$  = 7.9 Hz, 1H), 7.01 – 6.95 (m, 1H), 6.89 (s, 1H), 6.57 (ddd,  $J$  = 7.2, 5.0, 1.0 Hz, 1H), 6.43 (d,  $J$  = 8.5 Hz, 1H), 2.97 (s, 3H). **<sup>13</sup>C NMR** (150 MHz, CDCl<sub>3</sub>)  $\delta$  = 164.4 (C<sub>q</sub>), 163.4 (C<sub>q</sub>), 157.3 (C<sub>q</sub>), 150.6 (CH), 147.9 (CH), 141.7 (C<sub>q</sub>), 137.8 (CH), 136.5 (C<sub>q</sub>), 136.4 (C<sub>q</sub>), 134.9 (d,  $^2J_{C-F}$  = 32.5 Hz, C<sub>q</sub>), 133.5 (C<sub>q</sub>), 131.7 (C<sub>q</sub>), 129.1 (C<sub>q</sub>), 128.4 (CH), 126.3 (q,  $^3J_{C-F}$  = 3.7 Hz, CH), 125.4 (CH), 124.6 (CH), 123.5 (d,  $^1J_{C-F}$  = 273.2 Hz, C<sub>q</sub>), 121.2 (CH), 120.8 (CH), 119.9 (CH), 117.3 (q,  $^3J_{C-F}$  = 3.9 Hz, CH), 114.6 (CH), 108.8 (CH), 106.5 (CH), 36.8 (CH<sub>3</sub>). **<sup>19</sup>F NMR** (565 MHz, CDCl<sub>3</sub>)  $\delta$  = -62.53 (s, 3F). **HR-MS** (ESI)  $m/z$  calcd for C<sub>28</sub>H<sub>21</sub>F<sub>3</sub>N<sub>5</sub>O<sub>2</sub> [M+H<sup>+</sup>] 516.1642, found 516.1641.

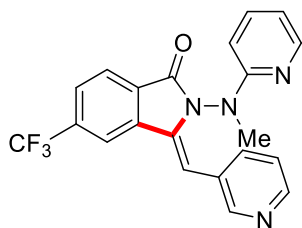

**(Z)-2-(Methyl[pyridin-2-yl]amino)-3-(pyridin-3-ylmethylene)-5-(trifluoromethyl)isoindolin-1-one (3cq)**

The general procedure was followed using hydrazide **1c** (88.6 mg, 0.30 mmol) and alkyne **2q** (92.8 mg, 0.90 mmol). Purification by column chromatography on silica gel (petroleum/EtOAc 10:1) yielded **3cq** (105.8 mg, 89%) as a light yellow solid. mp 141–142 °C. <sup>1</sup>H NMR (600 MHz, CDCl<sub>3</sub>)  $\delta$  = 8.42 (dd,  $J$  = 2.2, 1.0 Hz, 1H), 8.37 (ddd,  $J$  = 4.9, 1.7, 0.7 Hz, 1H), 8.12 (ddd,  $J$  = 4.9, 1.9, 0.9 Hz, 1H), 8.10 (s, 1H), 8.01 (d,  $J$  = 7.9 Hz, 1H), 7.82 (d,  $J$  = 7.9 Hz, 1H), 7.45 (ddd,  $J$  = 8.4, 7.2, 1.9 Hz, 1H), 7.38 (ddd,  $J$  = 7.8, 2.4, 1.7, 1H), 6.99 (dd,  $J$  = 7.8, 4.9 Hz, 1H), 6.80 (s, 1H), 6.73–6.68 (m, 1H), 6.36 (d,  $J$  = 8.5 Hz, 1H), 3.07 (s, 3H). <sup>13</sup>C NMR (150 MHz, CDCl<sub>3</sub>)  $\delta$  = 164.4 (C<sub>q</sub>), 156.9 (C<sub>q</sub>), 149.2 (CH), 148.6 (CH), 148.1 (CH), 137.8 (CH), 136.0 (C<sub>q</sub>), 135.9 (CH), 134.9 (q, <sup>2</sup> $J_{C-F}$  = 32.8 Hz, C<sub>q</sub>), 133.2 (C<sub>q</sub>), 129.5 (C<sub>q</sub>), 129.1 (C<sub>q</sub>), 126.5 (q, <sup>3</sup> $J_{C-F}$  = 3.8 Hz, CH), 124.6 (CH), 123.5 (d, <sup>1</sup> $J_{C-F}$  = 273.1 Hz, C<sub>q</sub>), 122.1 (CH), 117.5 (q, <sup>3</sup> $J_{C-F}$  = 4.1 Hz, CH), 115.3 (CH), 106.3 (CH), 104.9 (CH), 37.2 (CH<sub>3</sub>). <sup>19</sup>F NMR (565 MHz, CDCl<sub>3</sub>)  $\delta$  = -62.55 (s, 3F). HR-MS (ESI)  $m/z$  calcd for C<sub>21</sub>H<sub>16</sub>F<sub>3</sub>N<sub>4</sub>O [M+H<sup>+</sup>] 397.1271, found 397.1269.

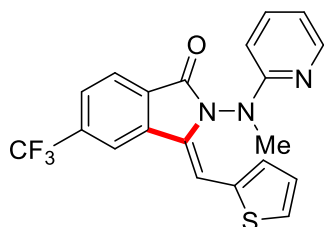

**(Z)-2-(Methyl[pyridin-2-yl]amino)-3-(thiophen-2-ylmethylene)-5-(trifluoromethyl)isoindolin-1-one (3cr)**

The general procedure was followed using hydrazide **1c** (88.6 mg, 0.30 mmol) and alkyne **2r** (105 mg, 0.90 mmol). Purification by column chromatography on silica gel (petroleum/EtOAc 10:1) yielded **3cr** (97.3 mg, 88%) as a light yellow solid. mp 115–

116 °C. **<sup>1</sup>H NMR** (600 MHz, CDCl<sub>3</sub>)  $\delta$  = 8.23 (ddd,  $J$  = 5.0, 1.9, 0.9 Hz, 1H), 8.07 (s, 1H), 8.00 (d,  $J$  = 7.9 Hz, 1H), 7.78 (d,  $J$  = 7.9 Hz, 1H), 7.51–7.43 (m, 1H), 7.18–7.17 (m, 1H), 7.15 (ddd,  $J$  = 4.1, 3.0, 1.1 Hz, 1H), 6.98 (dd,  $J$  = 5.0, 1.3 Hz, 1H), 6.80 (s, 1H), 6.75 (ddd,  $J$  = 7.2, 5.0, 0.9 Hz, 1H), 6.49 (d,  $J$  = 8.5 Hz, 1H), 3.24 (s, 3H). **<sup>13</sup>C NMR** (150 MHz, CDCl<sub>3</sub>)  $\delta$  = 164.3 (C<sub>q</sub>), 157.9 (C<sub>q</sub>), 148.1 (CH), 137.9 (CH), 136.8 (C<sub>q</sub>), 134.6 (q,  $^2J_{\text{C-F}}$  = 32.7 Hz, C<sub>q</sub>), 132.8 (C<sub>q</sub>), 130.4 (C<sub>q</sub>), 129.3 (CH), 128.9 (C<sub>q</sub>), 125.8 (q,  $^3J_{\text{C-F}}$  = 3.6 Hz, CH), 125.6 (CH), 125.0 (CH), 124.5 (CH), 123.6 (d,  $^1J_{\text{C-F}}$  = 271.3 Hz, C<sub>q</sub>), 117.0 (q,  $^3J_{\text{C-F}}$  = 3.9 Hz, CH), 115.2 (CH), 106.7 (CH), 104.2 (CH), 37.3 (CH<sub>3</sub>). **<sup>19</sup>F NMR** (565 MHz, CDCl<sub>3</sub>)  $\delta$  = -62.49 (s, 3F). **HR-MS** (ESI)  $m/z$  calcd for C<sub>20</sub>H<sub>15</sub>F<sub>3</sub>N<sub>3</sub>OS [M+H<sup>+</sup>] 402.0882, found 402.0880.

## Copper-mediated decarboxylative C–H/N–H activation

### (a) Copper-mediated decarboxylative C–H/N–H annulation

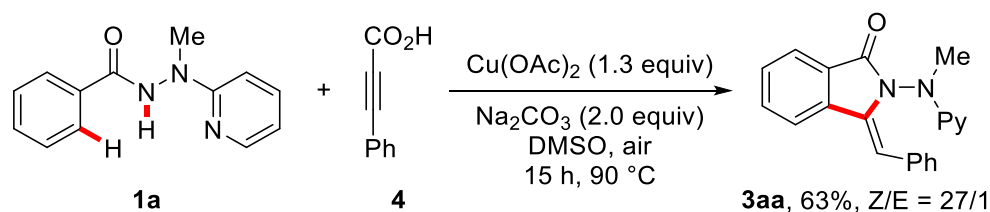

To a 25-mL Schlenk tube were added benzhydrazone **1** (68.2 mg, 0.30 mmol, 1.00 equiv), 3-phenylpropionic acid (131.5 mg, 0.90 mmol, 3.0 equiv),  $\text{Cu}(\text{OAc})_2$  (71 mg, 0.39 mmol, 1.30 equiv), and  $\text{Na}_2\text{CO}_3$  (64 mg, 0.60 mmol, 2.00 equiv) under an air atmosphere. The mixture was stirred at 90 °C for 15 h. At ambient temperature,  $\text{H}_2\text{O}$  (15 mL) and  $\text{Et}_3\text{N}$  (0.5 mL) were added and a suspension was formed immediately. After being filtered through a Celite® pad, the reaction mixture was extracted with EtOAc (3×20 mL). The combined organic phase was washed with brine (20 mL) and dried over  $\text{Na}_2\text{SO}_4$ . Then  $\text{Et}_3\text{N}$  (0.5 mL) and silica gel (0.8 g) were added and the combined solvent was removed under reduced pressure. The residue solid sample was purified by column chromatography on silica gel (petroleum/EtOAc = 6:1, with 1%  $\text{Et}_3\text{N}$ ) and yielded the desired product **3aa** (61.9 mg, 63%, Z/E = 27:1).

## Removal of the directing group

### (b) Removal of the Directing Group

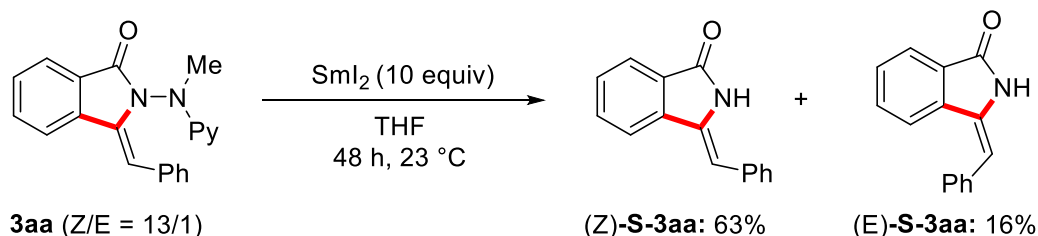

An oven-dried 100-mL Schlenk round bottom flask was charged with **3aa** (0.22 mmol, 73 mg). After purging with argon three times, freshly distilled THF (5.0 mL) was added, followed by SmI<sub>2</sub> (0.1 M in THF, 22 mL, 10 equiv), which was added dropwise at 0 °C. 30 minutes later, the mixture was warmed to ambient temperature and stirred for an additional 48 h. Then, the mixture was quenched with saturated aqueous Na<sub>2</sub>S<sub>2</sub>O<sub>3</sub> (5.0 mL) and extracted with DCM (3×20 mL), dried over Na<sub>2</sub>SO<sub>4</sub>, filtered, and concentrated under reduced pressure. The residue was purified by column chromatography on silica gel (petroleum/EtOAc = 5:1) and yielded the desired products **(Z)-S-3aa** (31.1 mg, 63%) and **(E)-S-3aa** (8.0 mg, 16%). **(Z)-3-Benzylideneisoindolin-1-one**: <sup>1</sup>H NMR (600 MHz, CDCl<sub>3</sub>) δ = 8.40 (s<sub>br</sub>, 1H), 7.87 (d, *J* = 7.6 Hz, 1H), 7.78 (d, *J* = 7.7 Hz, 1H), 7.63 (dd, *J* = 7.6, 1.1 Hz, 1H), 7.51 (dd, *J* = 7.5, 0.9 Hz, 1H), 7.48–7.40 (m, 4H), 7.30 (dd, *J* = 7.0, 1.5 Hz, 1H), 6.55 (s, 1H). <sup>13</sup>C NMR (150 MHz, CDCl<sub>3</sub>) δ = 169.0 (C<sub>q</sub>), 138.2 (C<sub>q</sub>), 135.0 (C<sub>q</sub>), 133.1 (C<sub>q</sub>), 132.2 (CH), 129.2 (CH), 129.2 (CH), 128.7 (C<sub>q</sub>), 128.5 (CH), 127.7 (CH), 123.5 (CH), 119.8 (CH), 105.9 (CH). **(E)-3-Benzylideneisoindolin-1-one**: <sup>1</sup>H NMR (600 MHz, CDCl<sub>3</sub>) δ = 8.80 (s, 1H), 7.87 (dd, *J* = 7.6, 1.1 Hz, 1H), 7.50–7.40 (m, 6H), 7.39–7.34 (m, 2H), 6.66 (s, 1H). <sup>13</sup>C NMR (150 MHz, CDCl<sub>3</sub>) δ = 168.3 (C<sub>q</sub>), 135.5 (C<sub>q</sub>), 134.9 (C<sub>q</sub>), 134.5 (C<sub>q</sub>), 131.8 (CH), 131.3 (C<sub>q</sub>), 129.5 (CH), 129.4 (CH), 128.6 (CH), 127.9 (CH), 123.4 (CH), 123.4 (CH), 112.1 (CH). The analytical data are in accordance with those previously reported in the literature [3-5].

## Mechanistic studies

### Competition experiments

(a) competition experiment

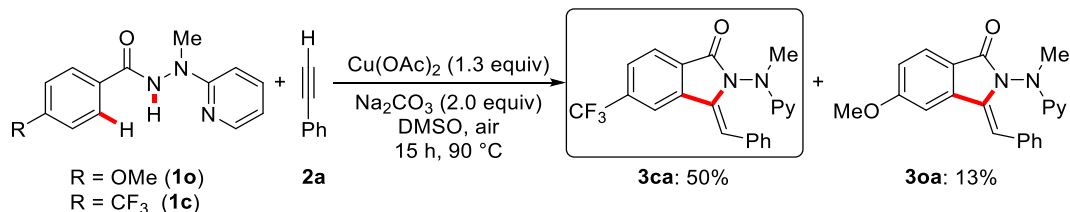

The general procedure was followed using hydrazides **1o** (77.2 mg, 0.30 mmol) and **1c** (88.6 mg, 0.30 mmol) and ethynylbenzene (**2a**, 91.8 mg, 0.9 mmol). The mixture was stirred at 90 °C for 3 h. At ambient temperature, H<sub>2</sub>O (15 mL) and Et<sub>3</sub>N (0.5 mL) were added, and a suspension was formed immediately. After being filtered through a Celite<sup>®</sup> pad, the reaction mixture was extracted with EtOAc/NEt<sub>3</sub> (100:1, 3×20 mL). The combined organic phase was washed with brine (20 mL) and dried over Na<sub>2</sub>SO<sub>4</sub>. After evaporation of the solvent, the crude mixture was analyzed by <sup>1</sup>H NMR using 1,3,5-trimethoxybenzene (9.5 mg, 0.056 mmol) as the internal standard, which showed a product distribution of 3.85:1 in favor of **3ca**.

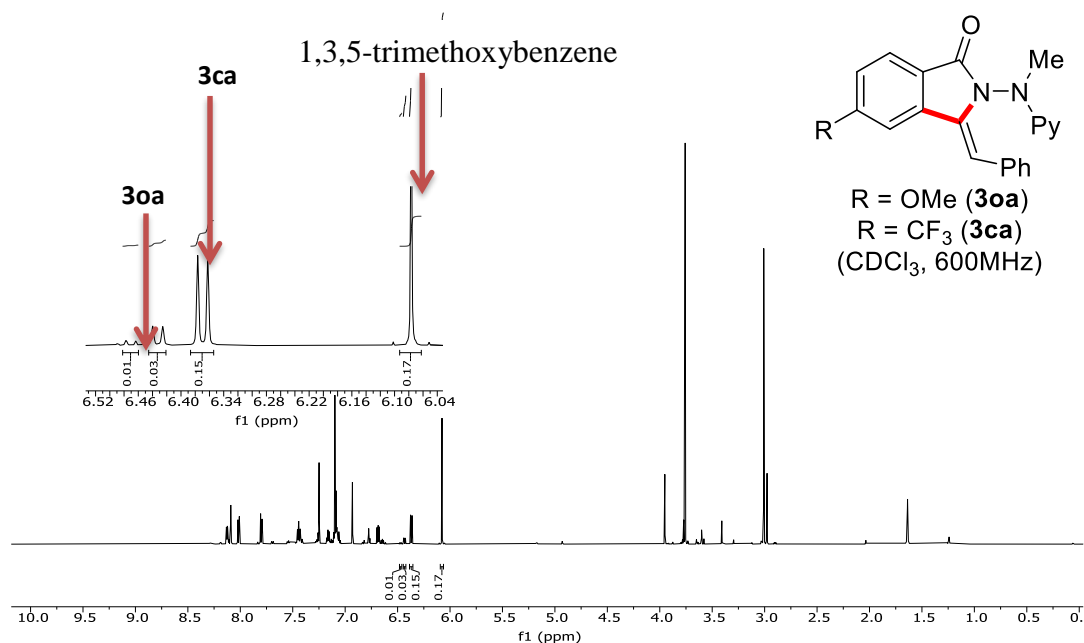

**Figure S-1:** <sup>1</sup>H NMR spectrum of a mixture of **3ca** and **3oa**.



(b) competition experiment

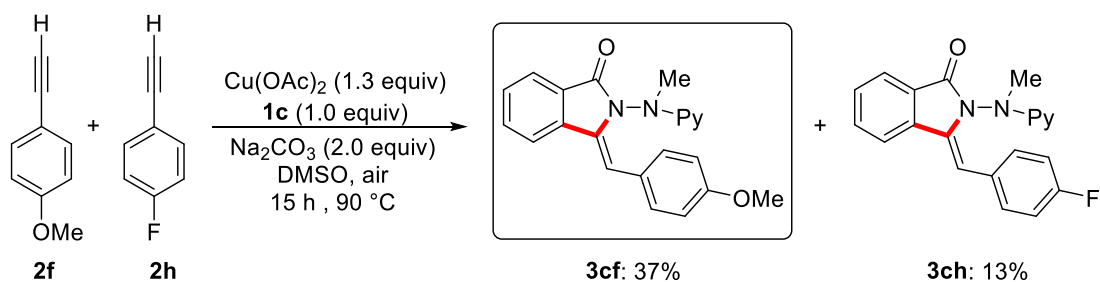

The general procedure was followed using hydrazide **1c** (88.6 mg, 0.30 mmol), alkyne **2f** (59.5 mg, 0.45 mmol), and alkyne **2i** (54.1 mg, 0.45 mmol). The mixture was stirred at 90 °C for 3 h. At ambient temperature,  $\text{H}_2\text{O}$  (15 mL) and  $\text{Et}_3\text{N}$  (0.5 mL) were added, and a suspension was formed immediately. After being filtered through a Celite<sup>®</sup> pad, the reaction mixture was extracted with  $\text{EtOAc}/\text{NEt}_3$  (100:1, 3×20 mL). The combined organic phase was washed with brine (20 mL) and dried over  $\text{Na}_2\text{SO}_4$ . After evaporation of the solvent, the crude mixture was analyzed by  $^1\text{H}$  NMR using 1,3,5-trimethoxybenzene (9.3 mg, 0.055 mmol) as the internal standard, which showed a product distribution of 2.85:1 in favor of **3cf**.

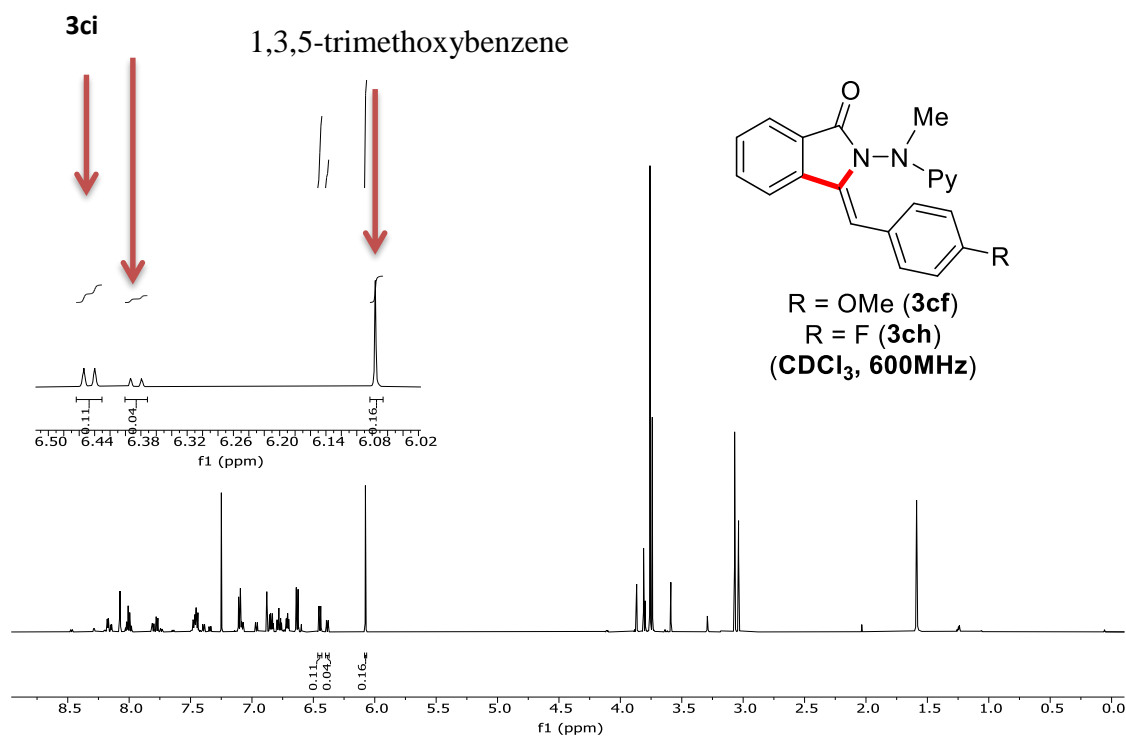

**Figure S-2:**  $^1\text{H}$  NMR spectrum of a mixture of **3cf** and **3ch**.

## Deuteration experiment

(c) H/D exchange experiment

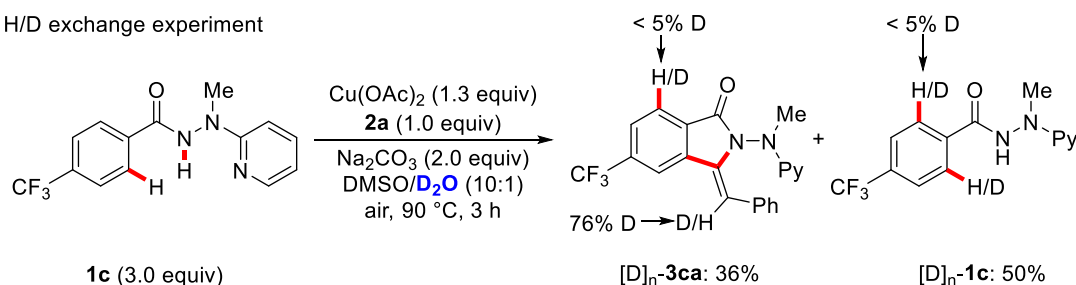

The general procedure was followed using alkyne **2a** (30.6 mg, 0.30 mmol) and hydrazide **1c** (265.8 mg, 0.90 mmol). The mixture was stirred in a solvent mixture of DMSO/ $\text{D}_2\text{O}$  (10:1, 6.6 mL) at  $90^\circ\text{C}$  for 3 h. At ambient temperature,  $\text{H}_2\text{O}$  (15 mL) and  $\text{Et}_3\text{N}$  (0.5 mL) were added, and a suspension was formed immediately. After being filtered through a Celite<sup>®</sup> pad, the reaction mixture was extracted with EtOAc/ $\text{NEt}_3$  (100:1, 3×20 mL). The combined organic phase was washed with brine (20 mL) and dried over  $\text{Na}_2\text{SO}_4$ . Then  $\text{Et}_3\text{N}$  (1.0 mL), silica gel (0.8 g) were added and the combined solvent was removed under reduced pressure. The residue solid sample was purified by column chromatography on silica gel (petroleum/EtOAc = 5:1 to 2:1, with 1%  $\text{Et}_3\text{N}$ ) and yielded the desired product  $[\text{D}]_n\text{-3ca}$  (43 mg, 36%) and reisolated starting material  $[\text{D}]_n\text{-1c}$  (132 mg, 50%) as white solids. The H/D-scrambling was analyzed in each of the compounds by  $^1\text{H}$  NMR spectroscopy.

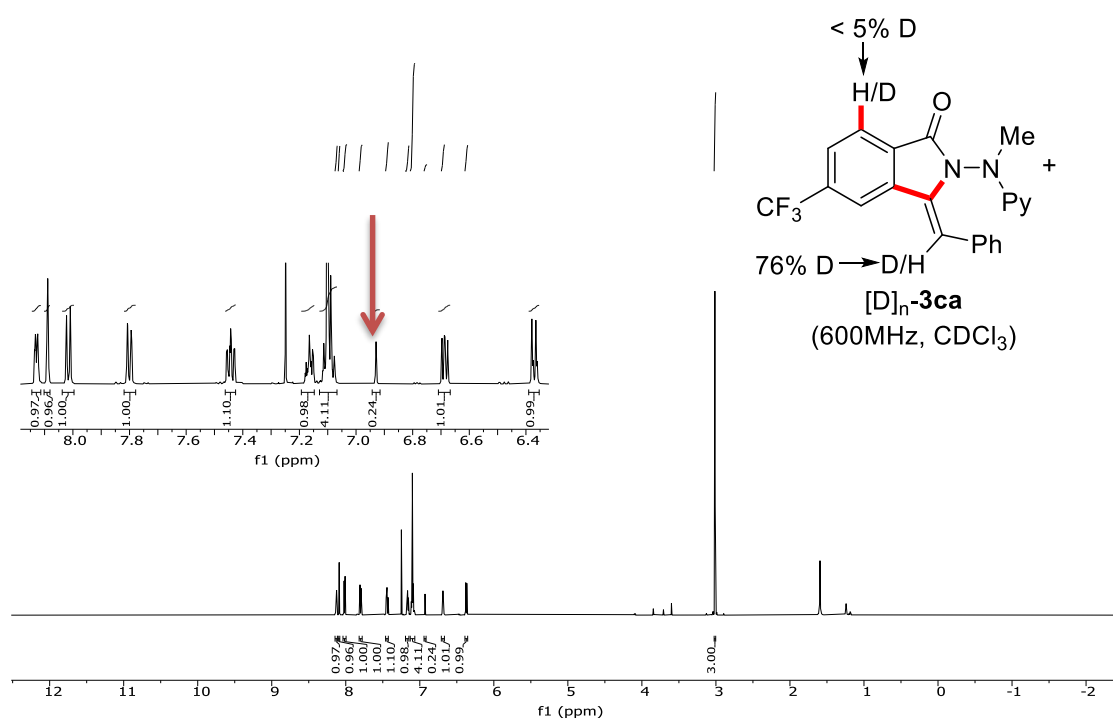

**Figure S-3:**  $^1\text{H}$  NMR spectrum of a mixture of  $[D]_n\text{-3ca}$ .

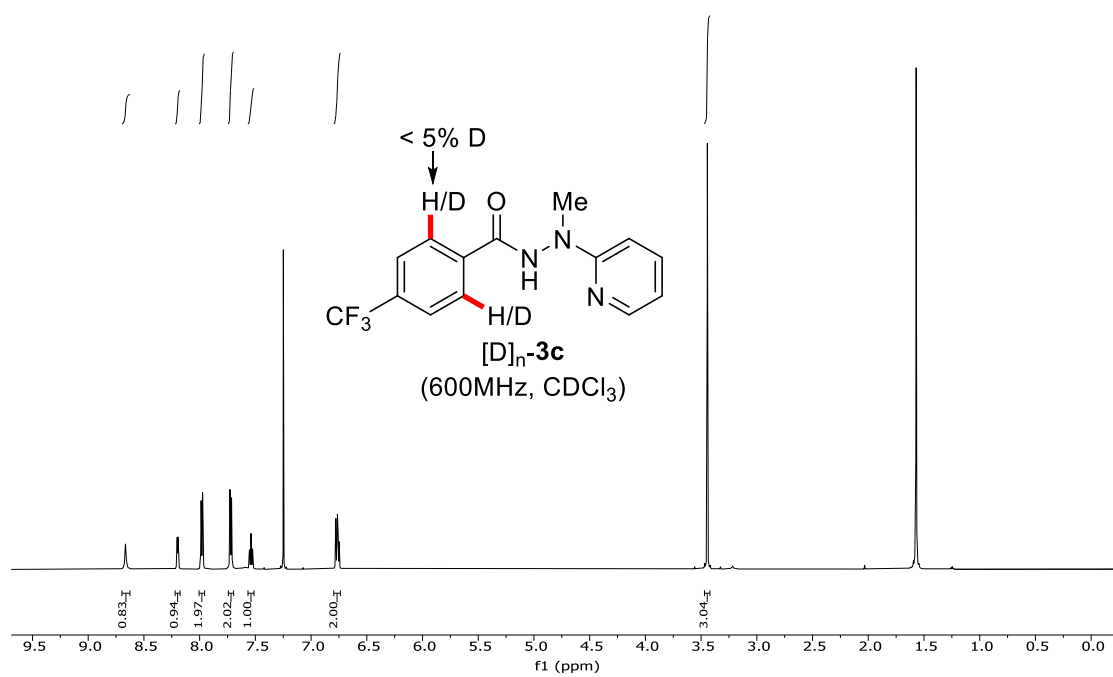

**Figure S-4:**  $^1\text{H}$  NMR spectrum of a mixture of  $[D]_n\text{-1c}$ .

## KIE studies

### Parallel experiment

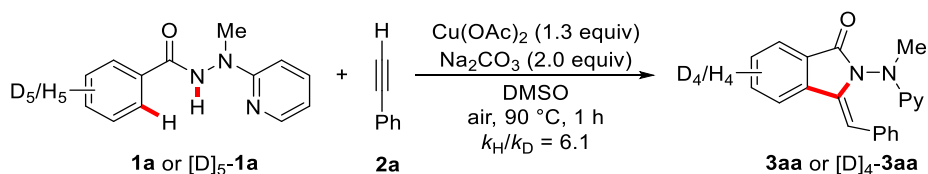

Two independent reactions following the general procedure were carried out using substrates **1a**,  $[D]_5\text{-1a}$  (0.30 mmol each), and ethynylbenzene (**2a**, 91.8 mg, 0.90 mmol). The mixture was stirred at  $90\text{ }^\circ\text{C}$  for 1 h. At ambient temperature, these two mixtures were combined and quenched by adding  $\text{H}_2\text{O}$  (15 mL) and  $\text{Et}_3\text{N}$  (0.5 mL). After being filtered through a Celite<sup>®</sup> pad, the reaction mixture was extracted with  $\text{EtOAc}/\text{Et}_3\text{N}$  (100:1,  $3\times 20\text{ mL}$ ). The combined organic phase was washed with brine (20 mL) and dried over  $\text{Na}_2\text{SO}_4$ . Then,  $\text{Et}_3\text{N}$  (1.0 mL) and silica gel (0.8 g) were added, and the combined solvent was removed under reduced pressure. The residual solid sample was purified by column chromatography on silica gel (petroleum/ $\text{EtOAc}$  = 5:1 to 2:1, with 1%  $\text{Et}_3\text{N}$ ) and yielded the mixture of the desired products  $[D]_4\text{-3aa}$  and **3aa** (53.0 mg, 27%). The H/D-scrambling was analyzed by  $^1\text{H}$  NMR spectroscopy.

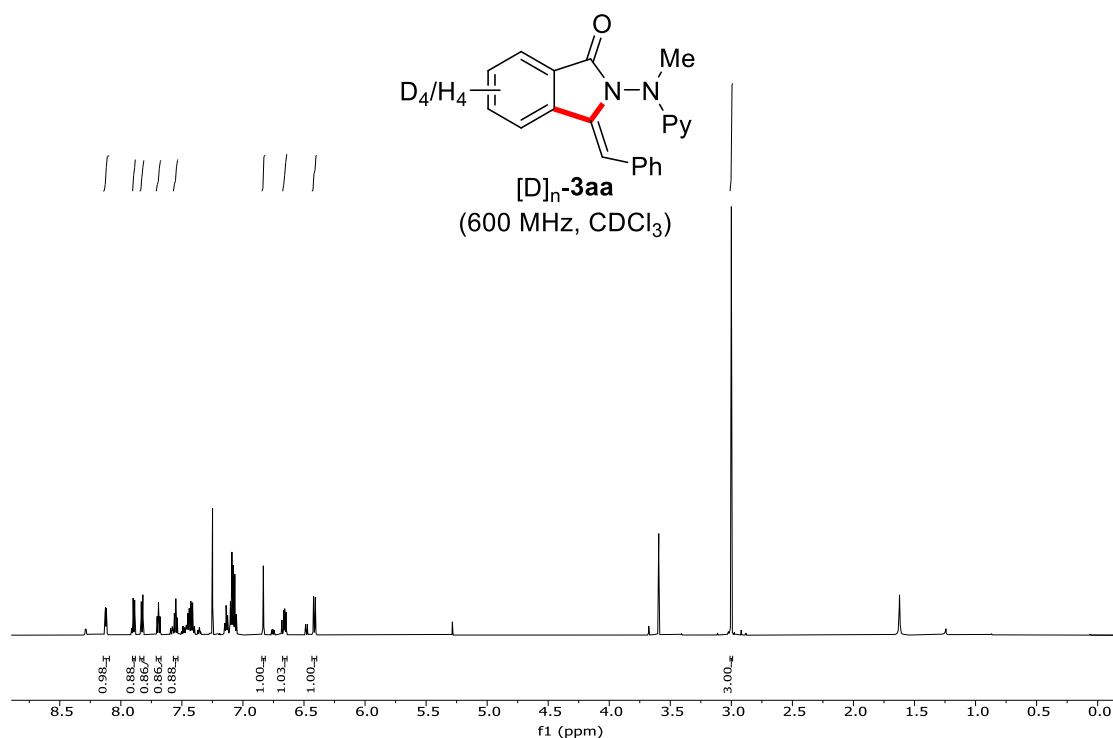

**Figure S-5:** <sup>1</sup>H NMR spectrum of **3aa** and [D]<sub>4</sub>-**3aa** for the parallel experiment.

competition experiment

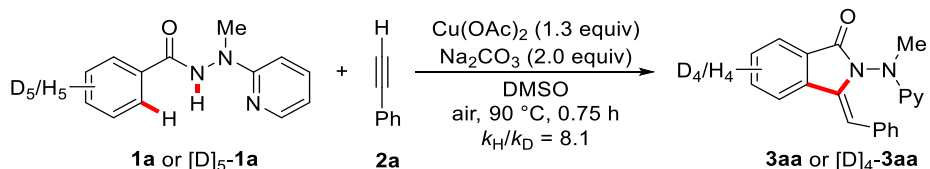

The general procedure was followed using hydrazide **1a** (68.2 mg, 0.30 mmol), [D]<sub>5</sub>-**1a** (69.4 mg, 0.30 mmol), and ethynylbenzene (**2a**, 91.8 mg, 0.90 mmol). The mixture was stirred at 90 °C for 0.75 h. At ambient temperature, H<sub>2</sub>O (15 mL) and Et<sub>3</sub>N (0.5 mL) were added, and a suspension was formed immediately. After being filtered through a Celite<sup>®</sup> pad, the reaction mixture was extracted with EtOAc/NEt<sub>3</sub> (100:1, 3×20 mL). The combined organic phase was washed with brine (20 mL) and dried over Na<sub>2</sub>SO<sub>4</sub>. Then, Et<sub>3</sub>N (1.0 mL) and silica gel (0.8 g) were added, and the combined solvent was removed under reduced pressure. The residual solid sample was purified by column chromatography on silica gel (petroleum/EtOAc = 5:1 to 2:1, with 1% Et<sub>3</sub>N)

and yielded the mixture of the desired products  $[D]_4\text{-}\mathbf{3aa}$  and  $\mathbf{3aa}$  (37.3 mg, 19%) as a light yellow oil. The H/D-scrambling was analyzed by  $^1\text{H}$  NMR spectroscopy.

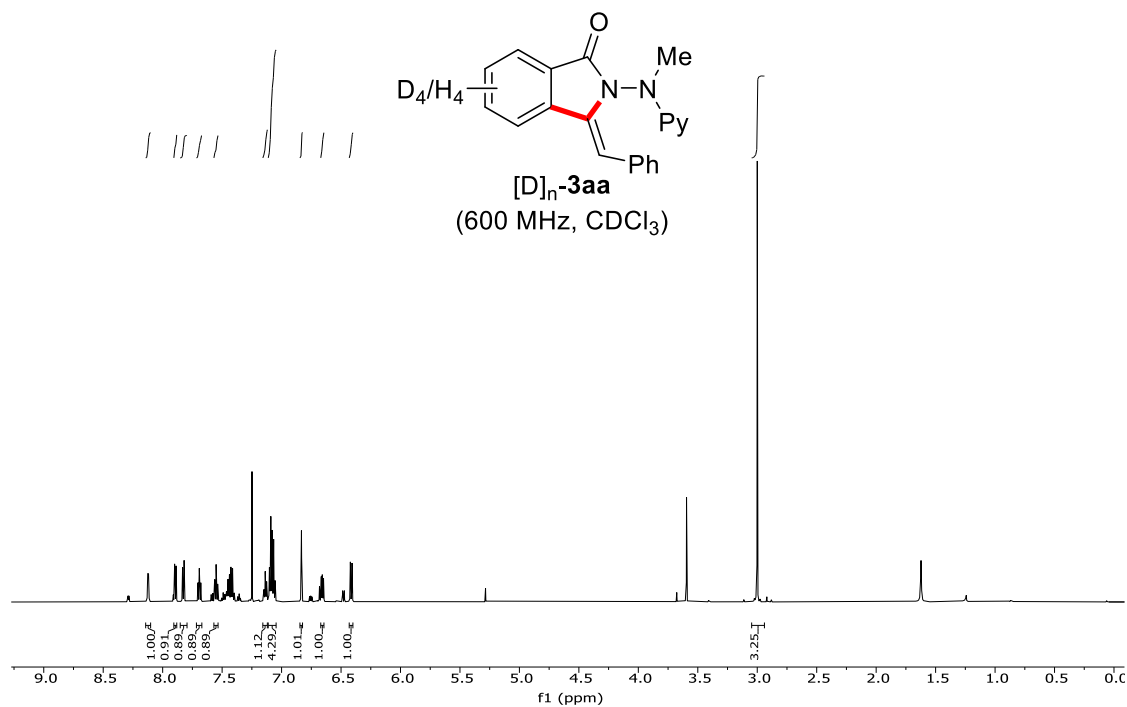

**Figure S-6:**  $^1\text{H}$  NMR spectrum of  $\mathbf{3aa}$  and  $[D]_4\text{-}\mathbf{3aa}$  for the competition experiment.

## References

- [1] Zhai, S.; Qiu, S.; Chen, X.; Wu, J.; Zhao, H.; Tao, C.; Li, Y.; Cheng, B.; Wang, H.; Zhai, H. *Chem. Commun.* **2018**, *54*, 98–101.
- [2] Mei, R.; Sauermann, N.; Oliveira, J. C.; Ackermann, L. *J. Am. Chem. Soc.* **2018**, *140*, 7913–7921.
- [3] a) Munoz, S. B.; Krishnamurti, V.; Barrio, P.; Mathew, T.; Prakash, G. K. S. *Org. Lett.* **2018**, *20*, 1042–1045.
- [4] Zhang, L.-B.; Hao, X.-Q.; Liu, Z.-J.; Zheng, X.-X.; Zhang, S.-K.; Niu, J.-L.; Song, M.-P. *Angew. Chem., Int. Ed.* **2015**, *54*, 10012–10015.
- [5] Li, L.; Wang, M.; Zhang, X.; Jiang, Y.; Ma, D. *Org. Lett.* **2009**, *11*, 1309–1312.

# NMR spectra

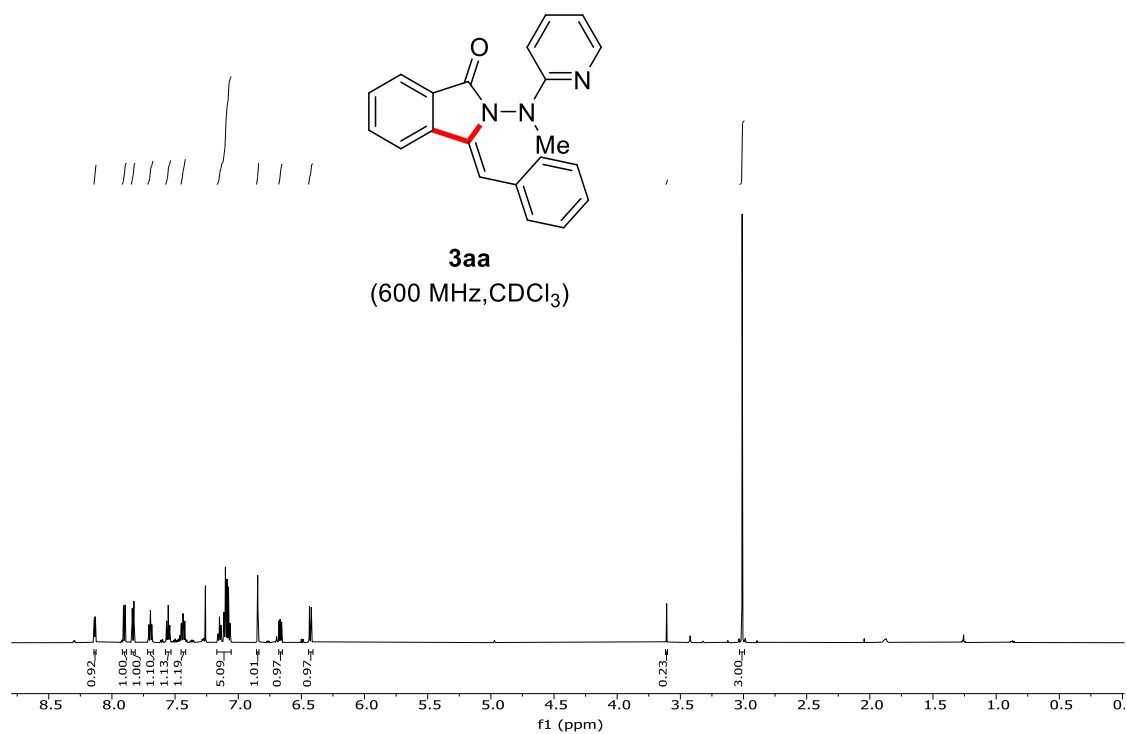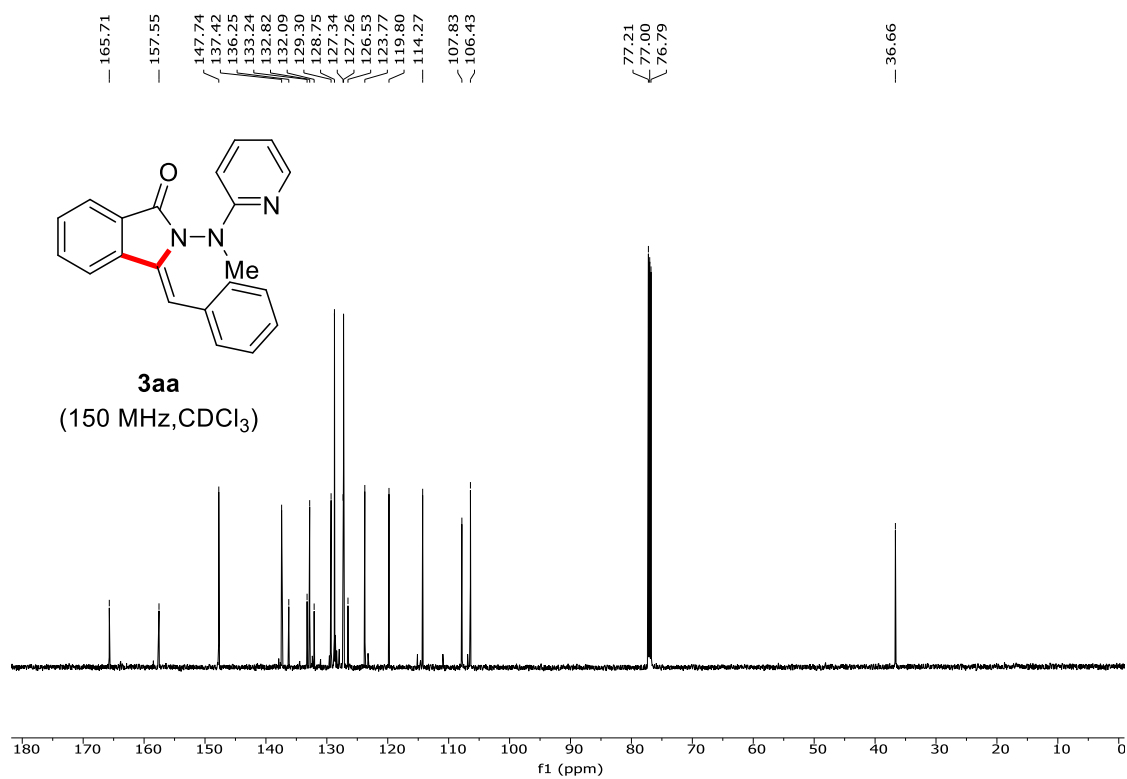



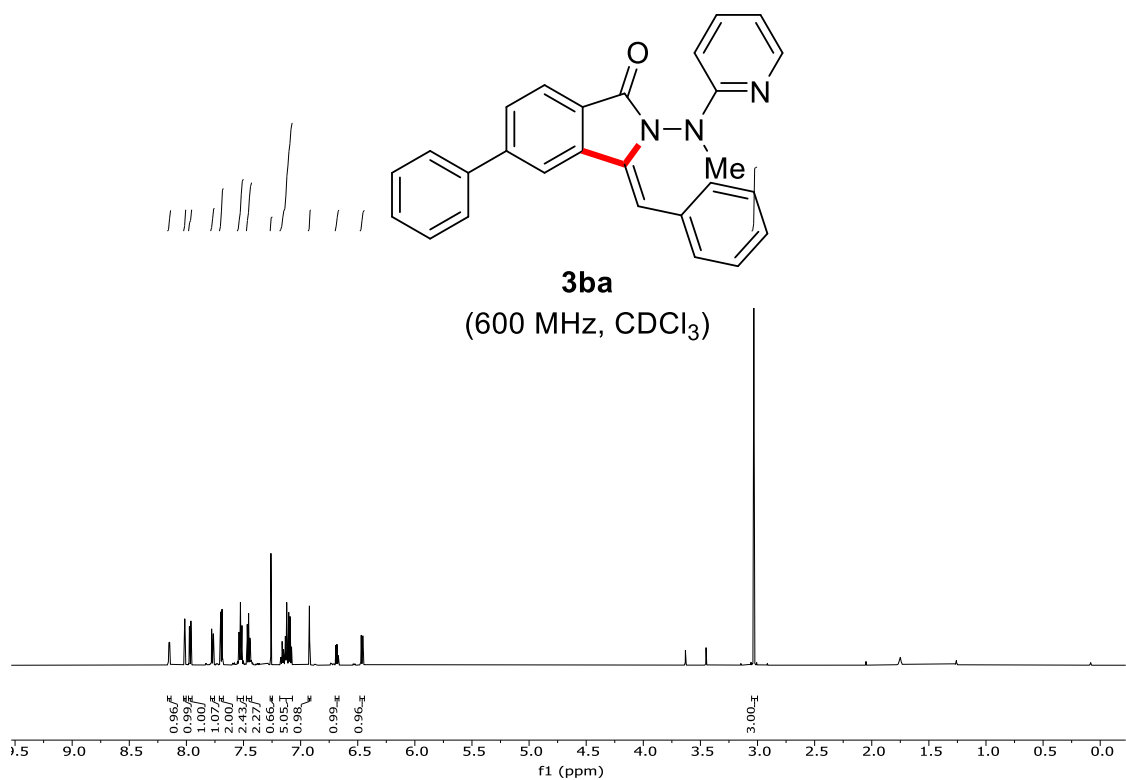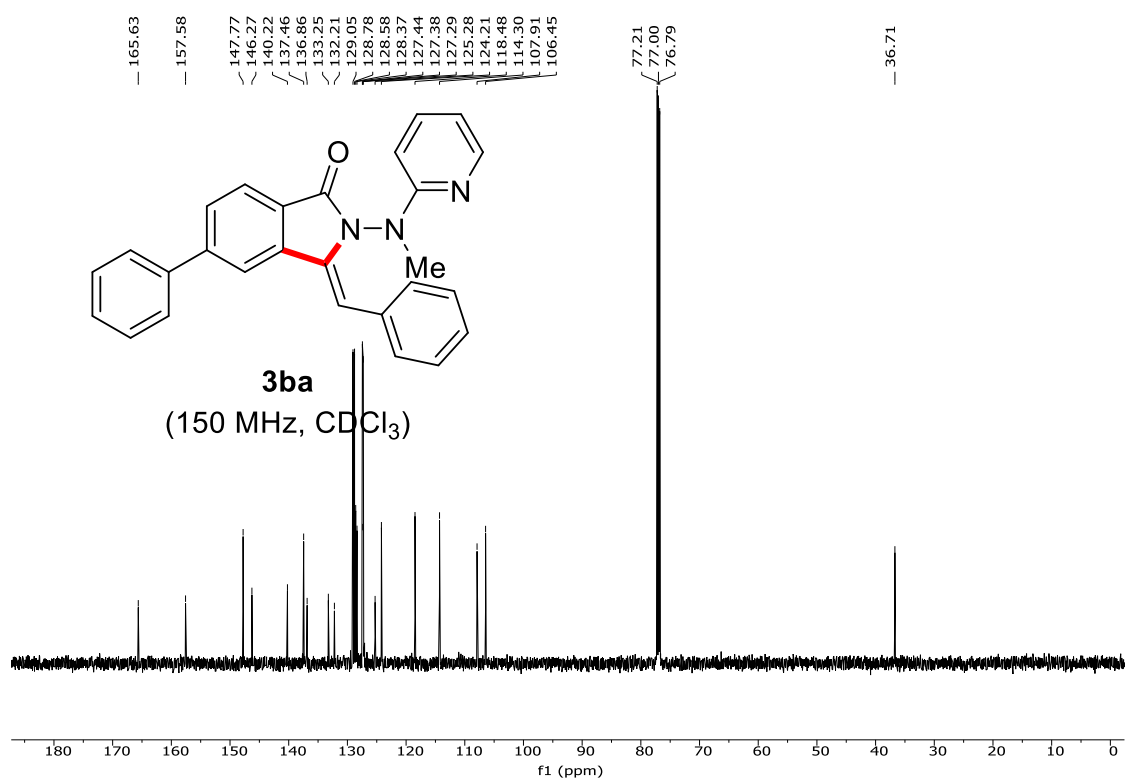

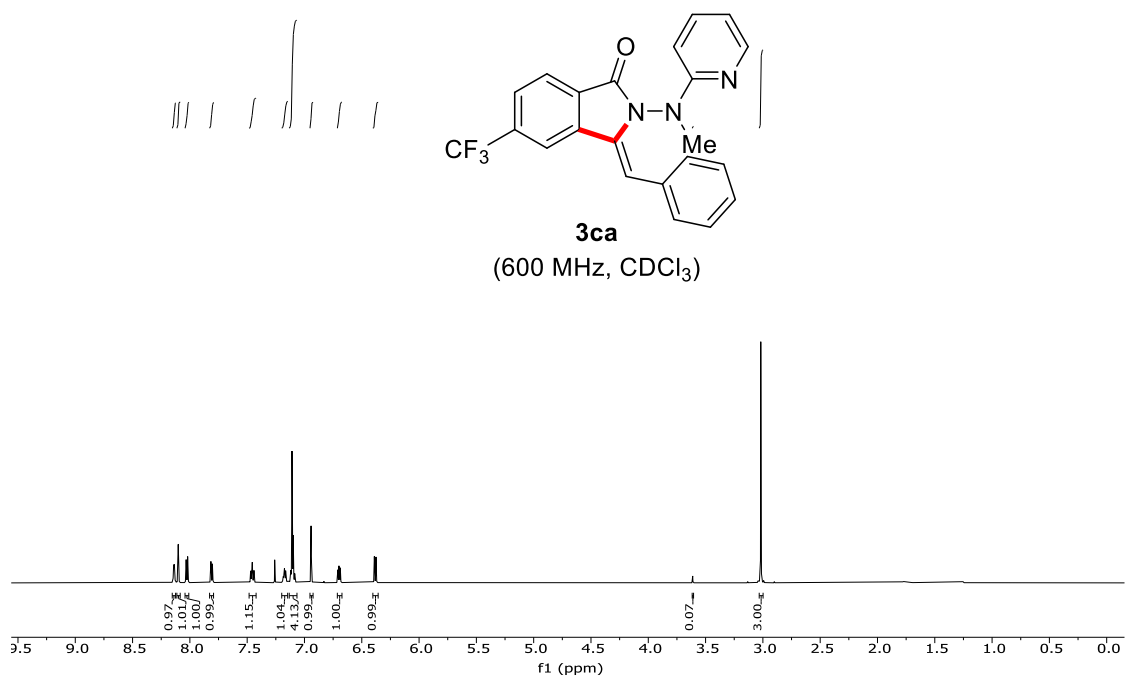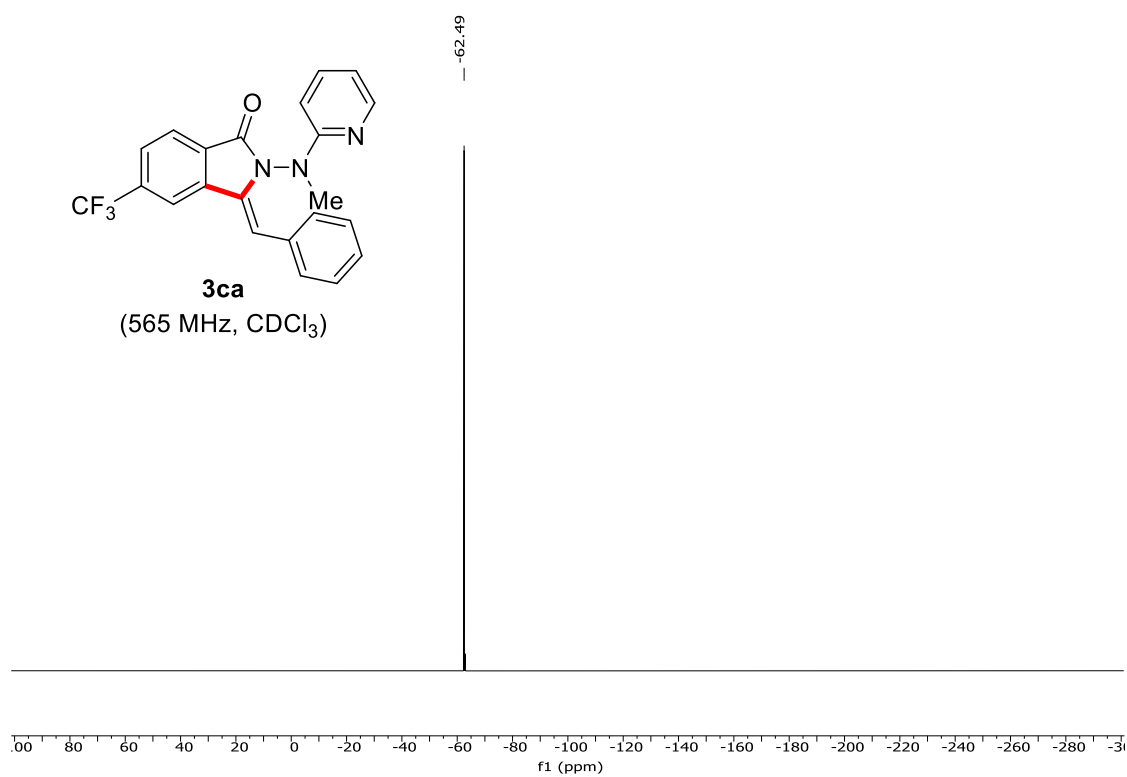

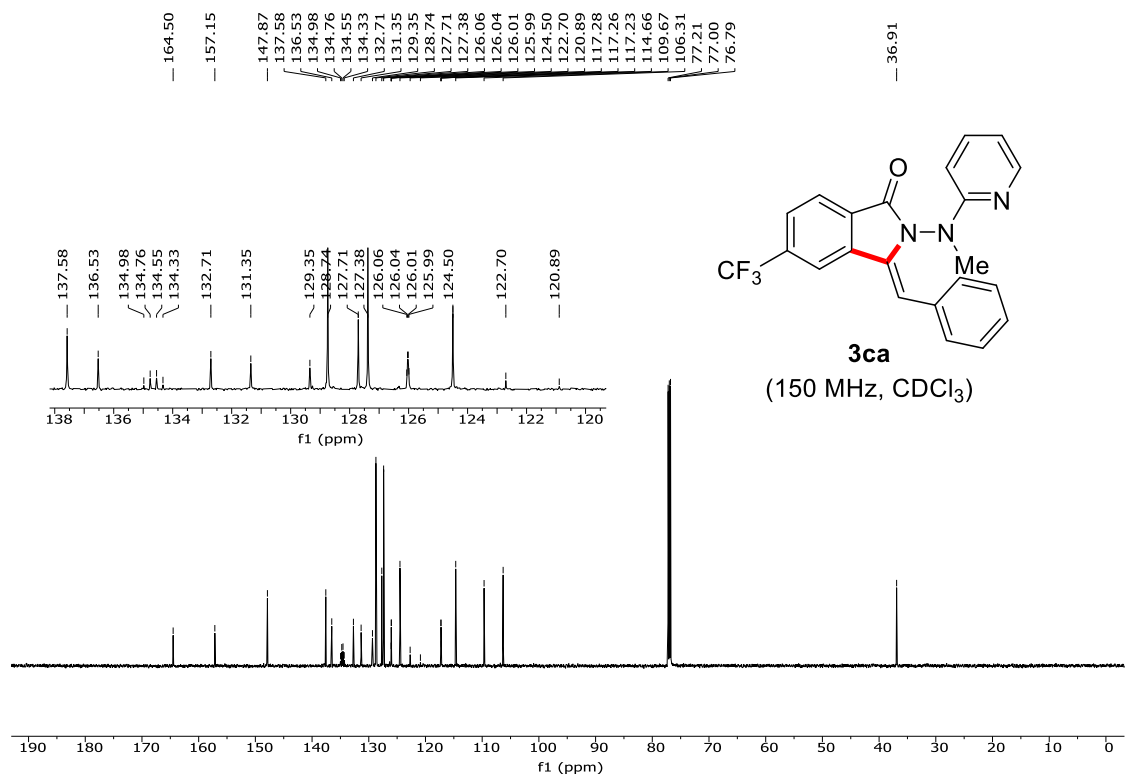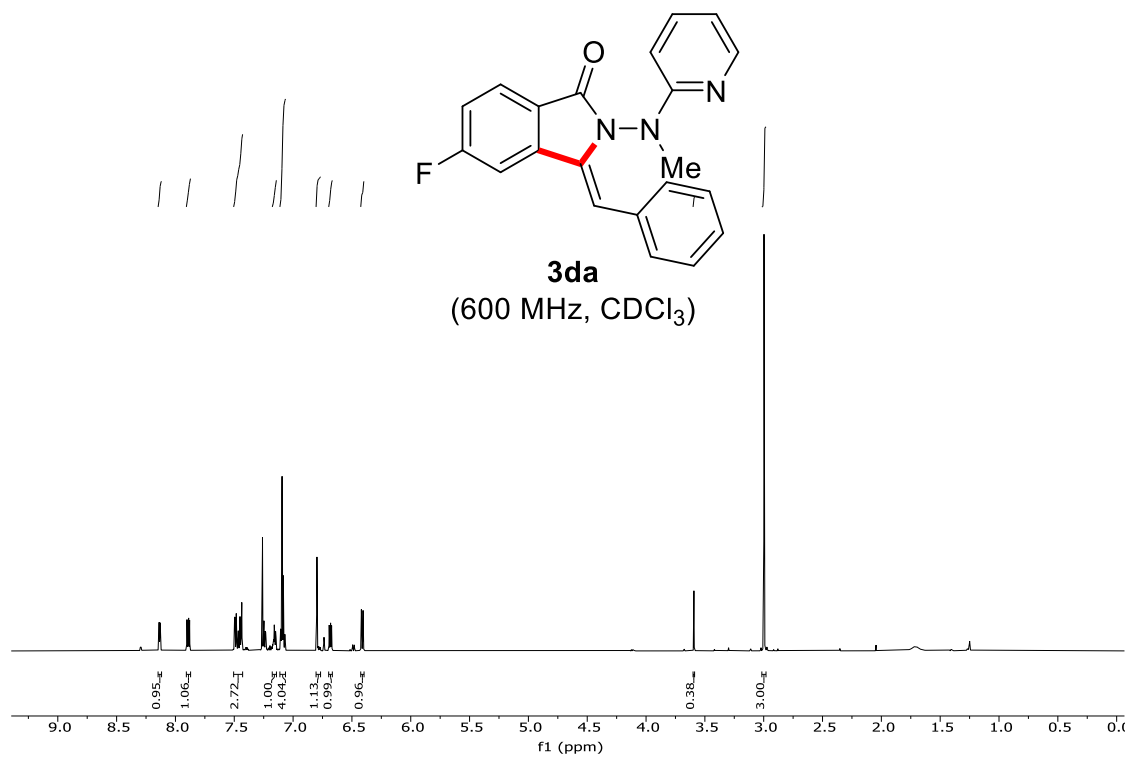

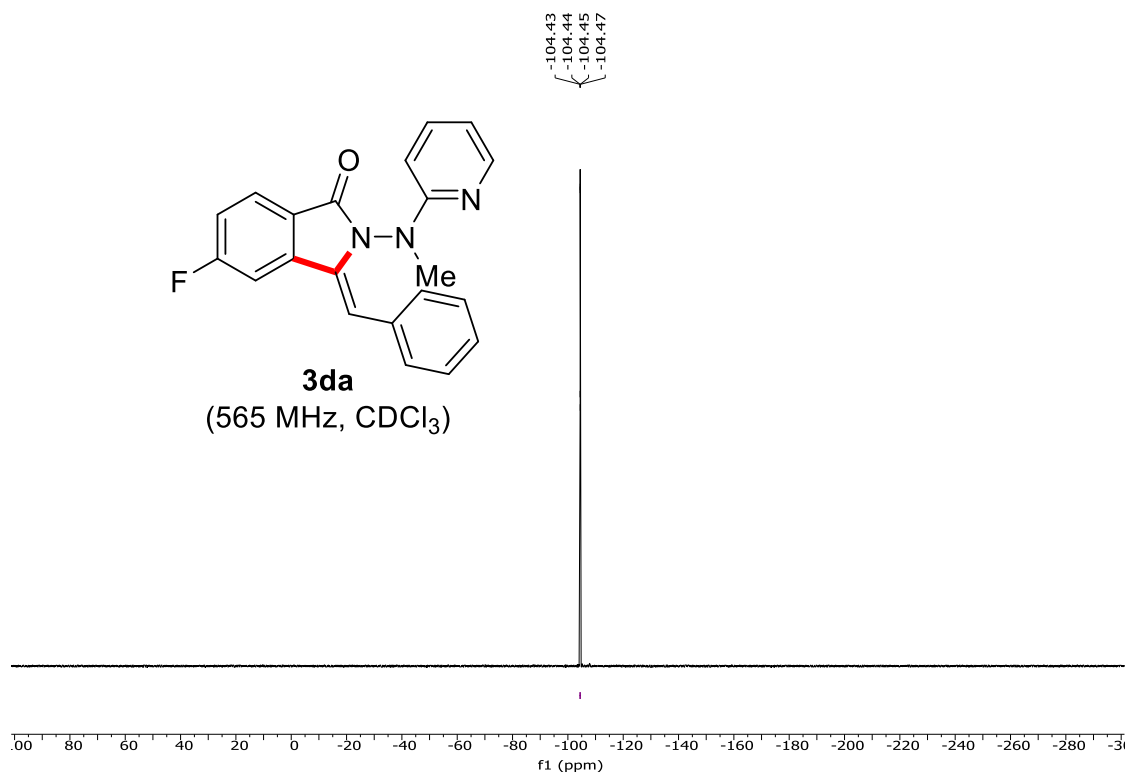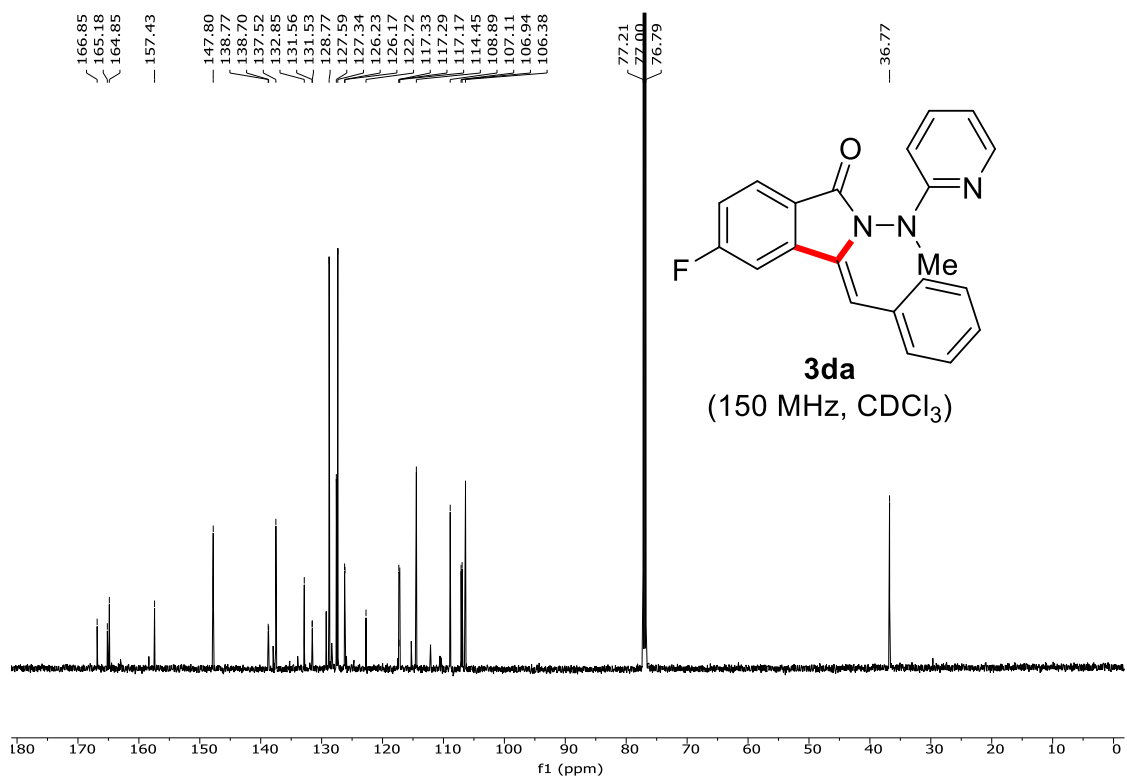

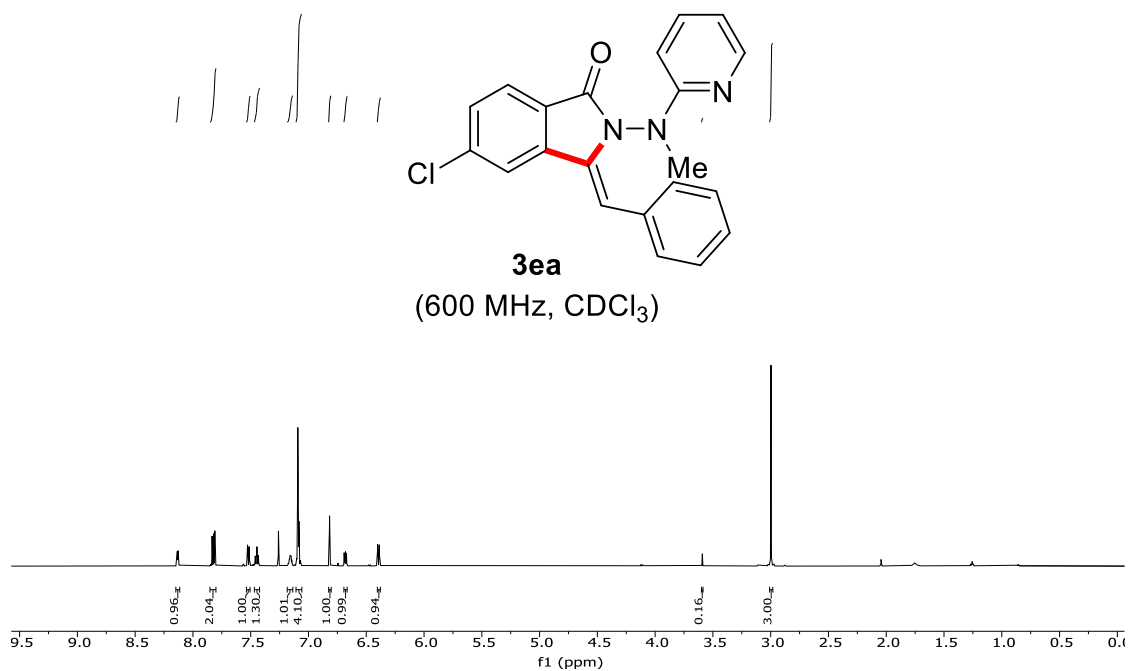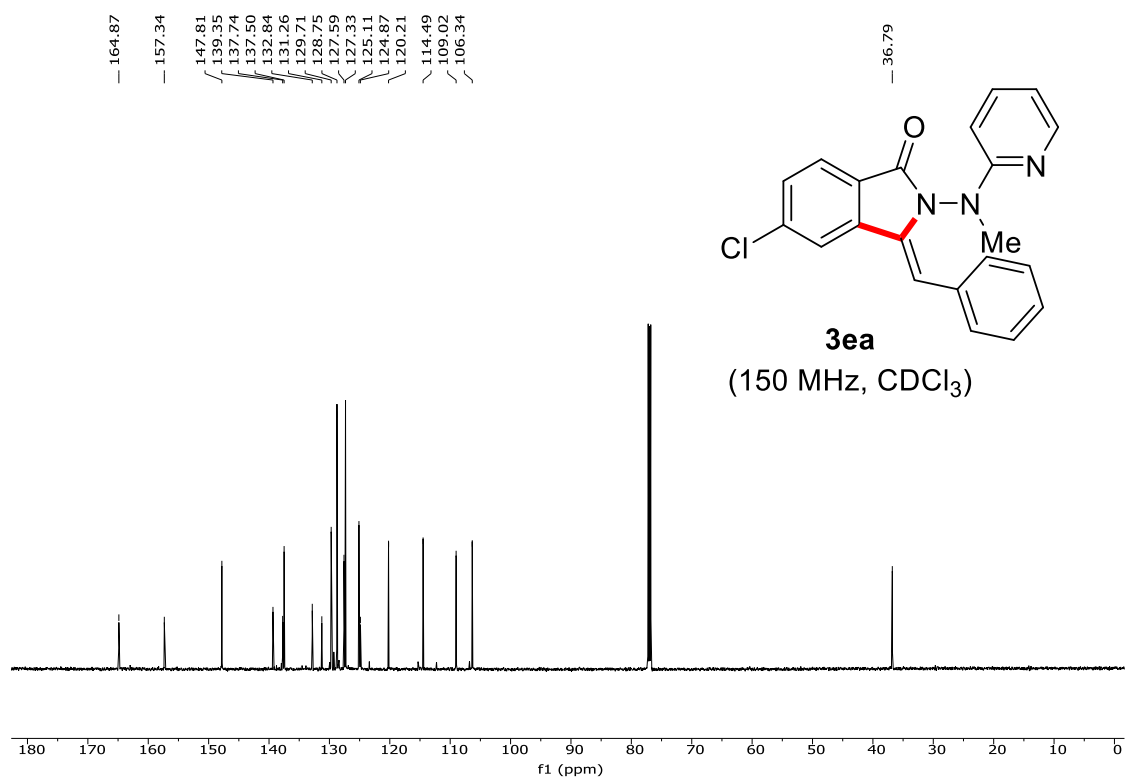

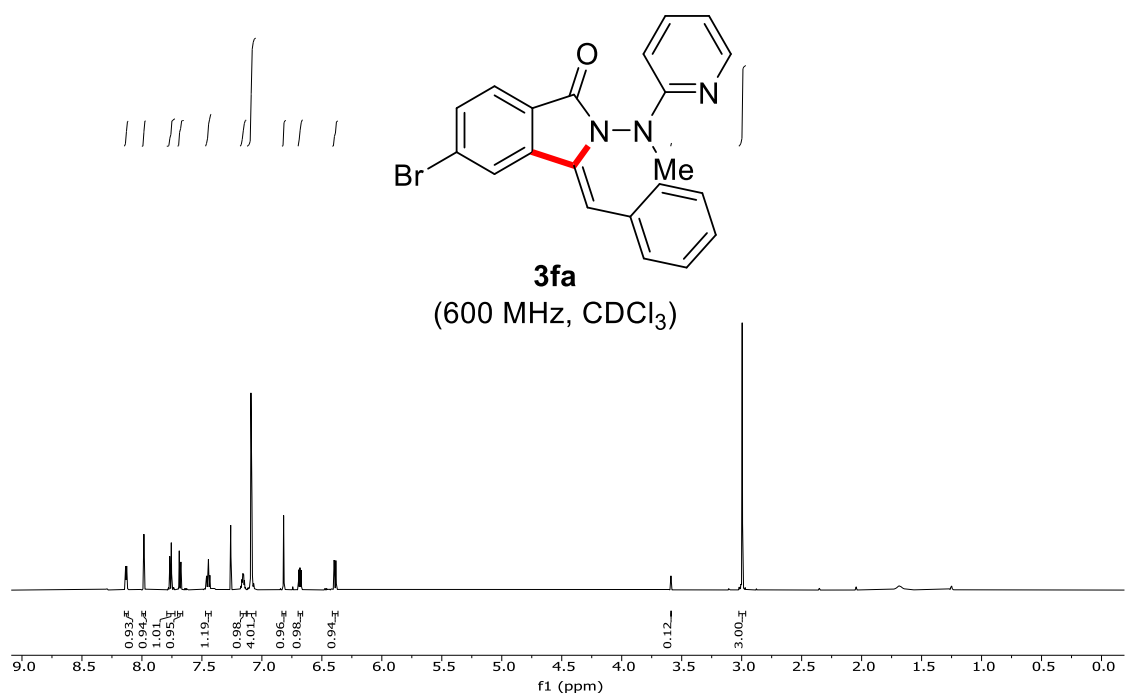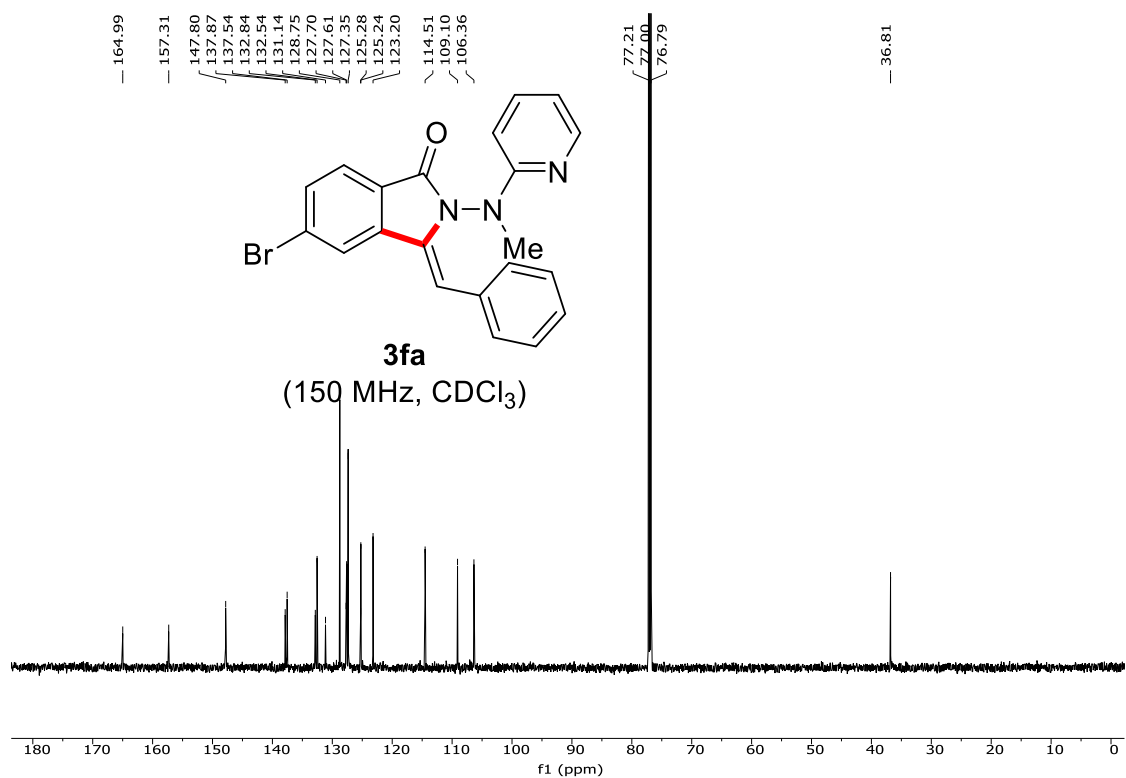

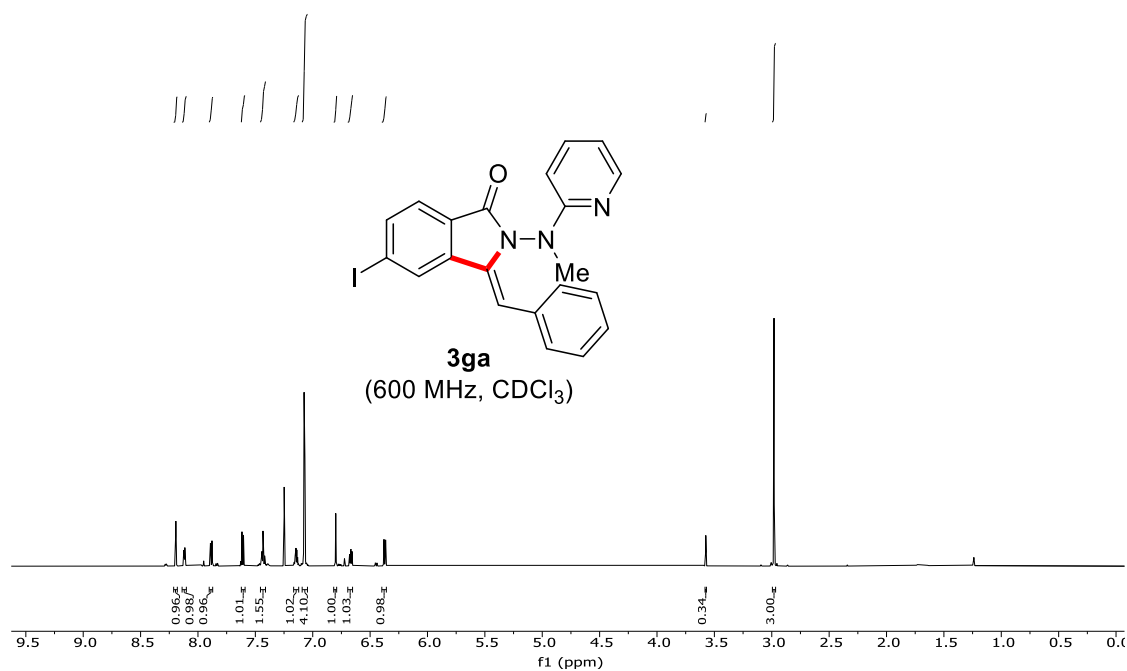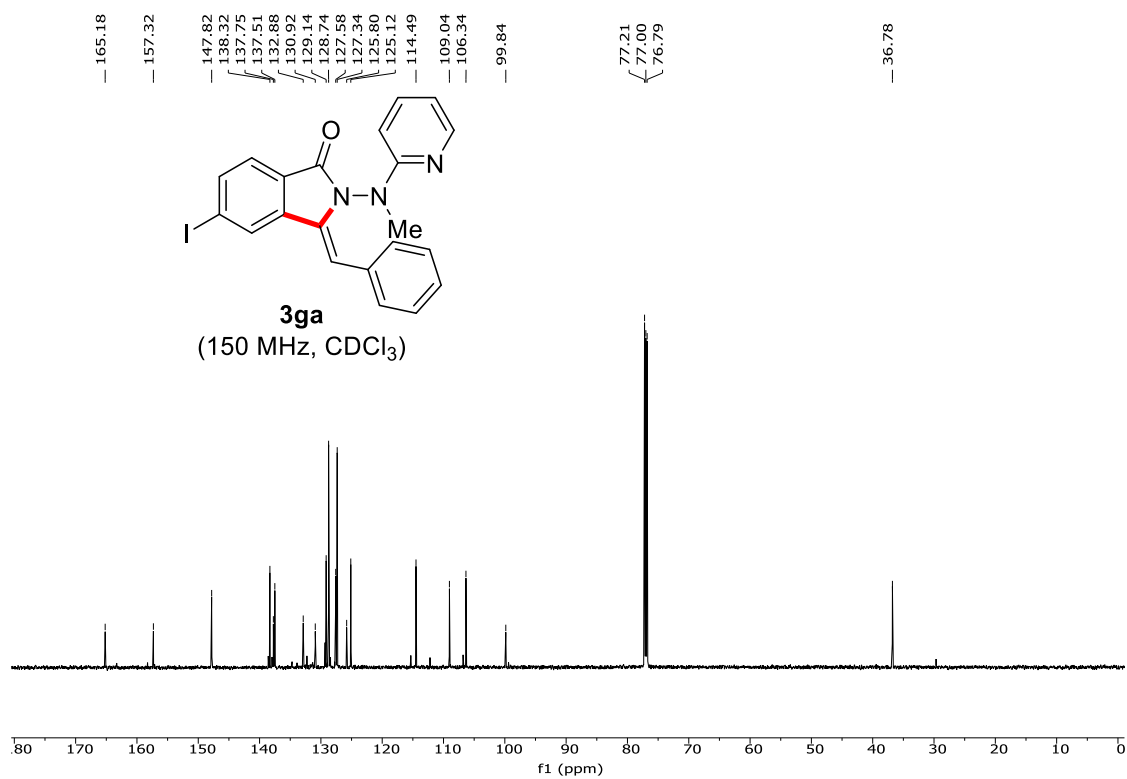

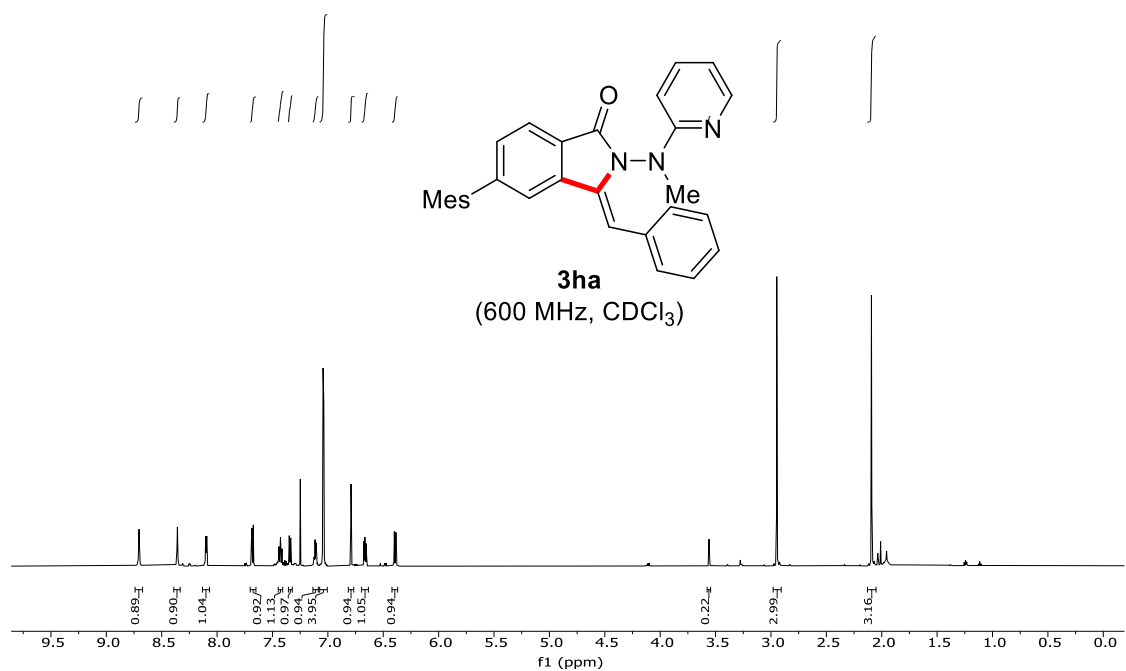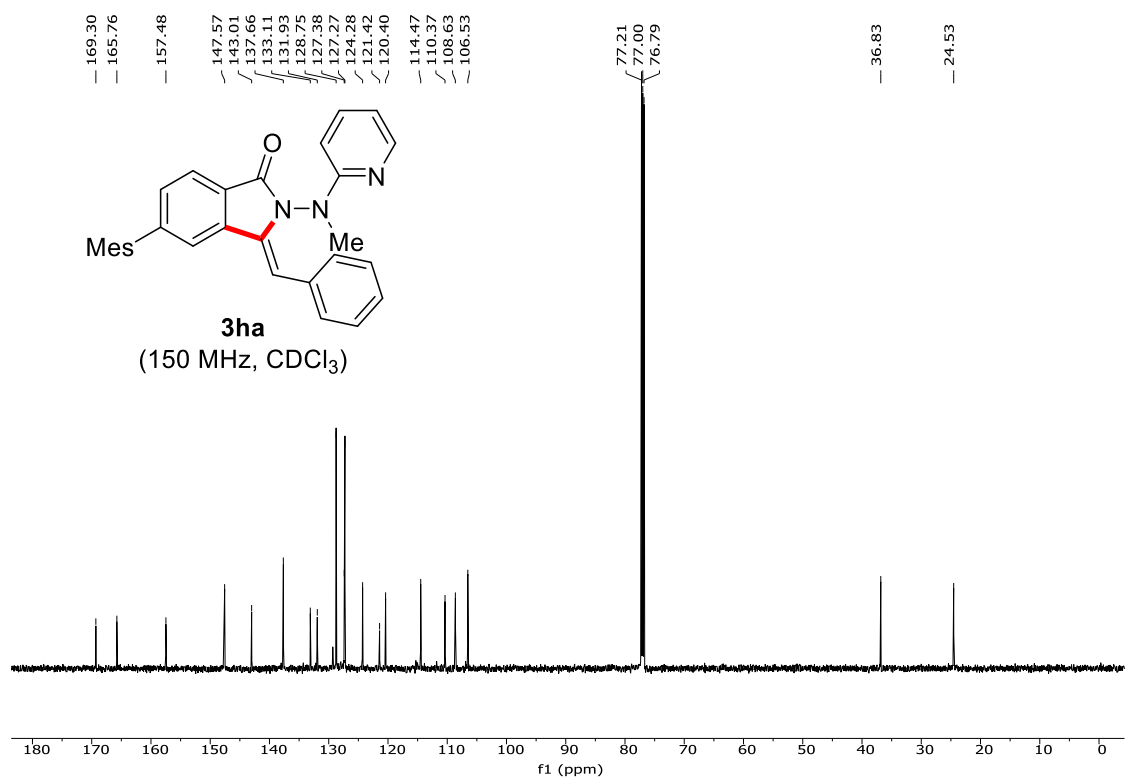



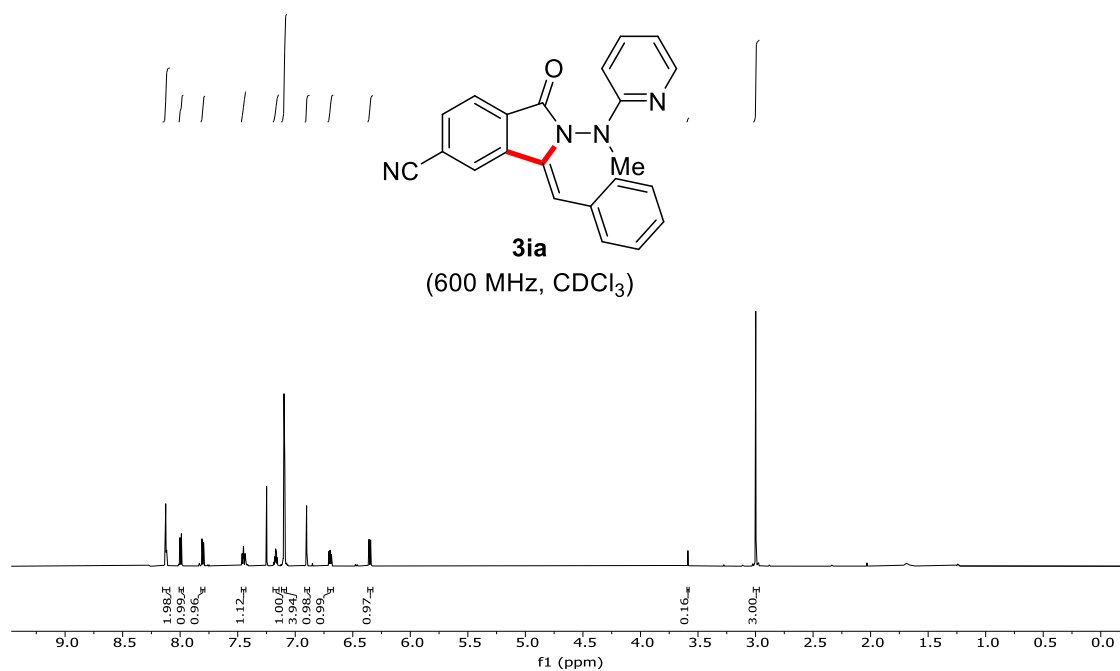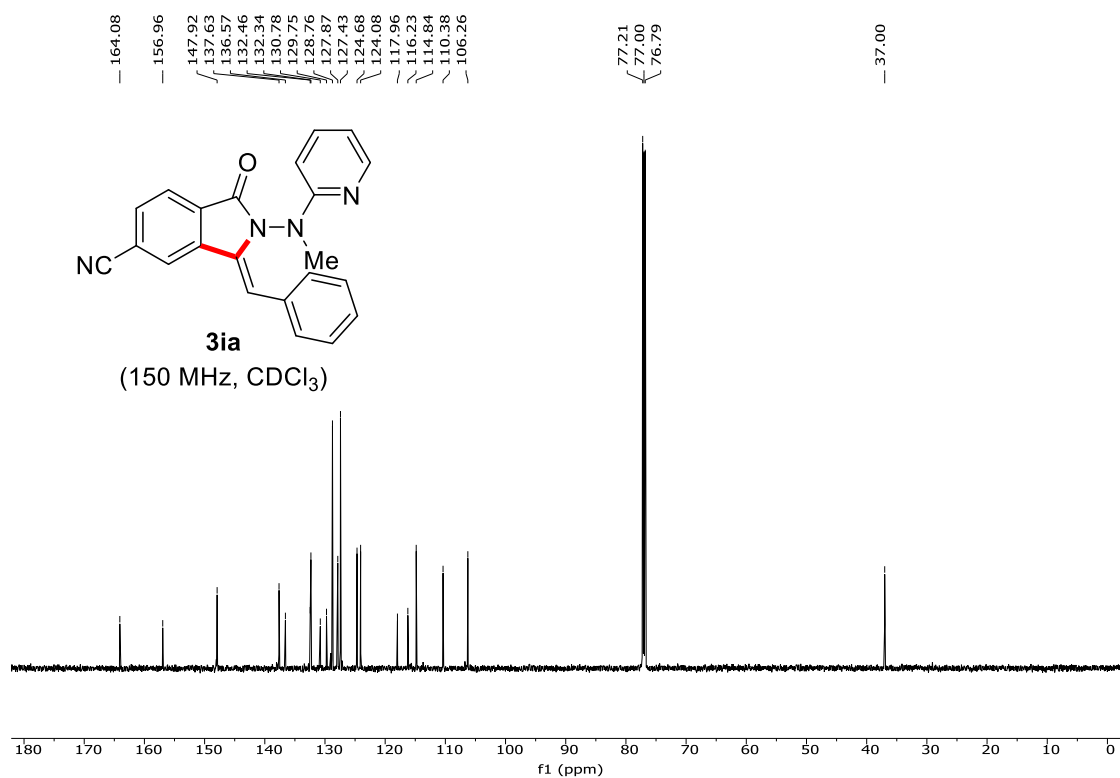

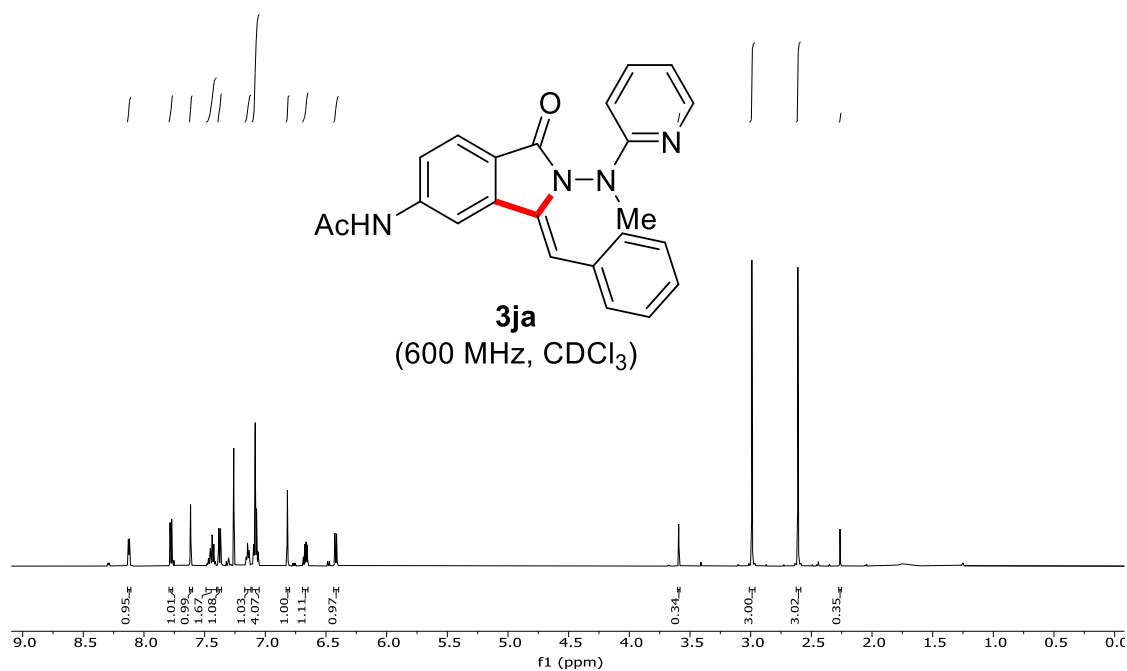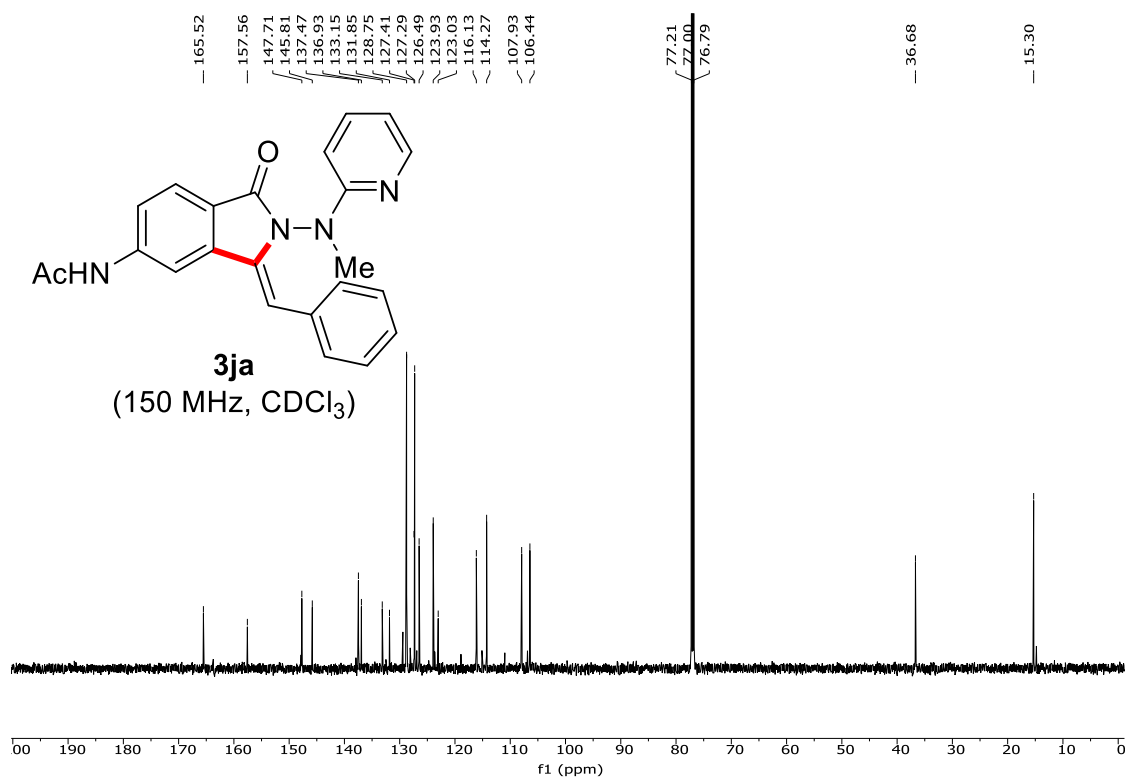

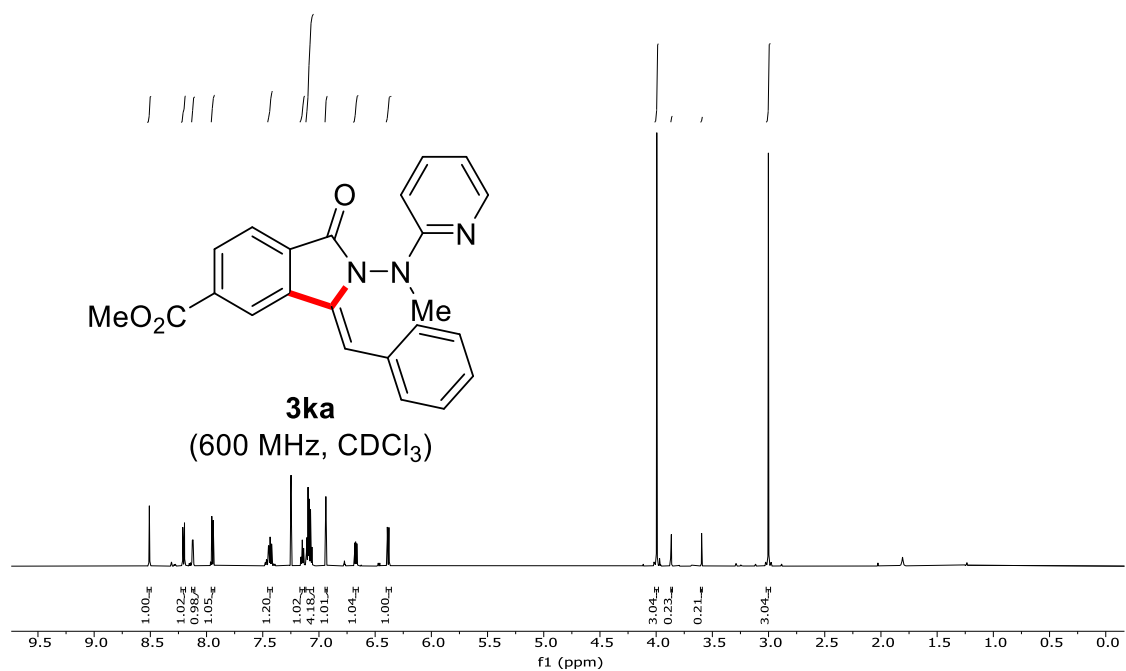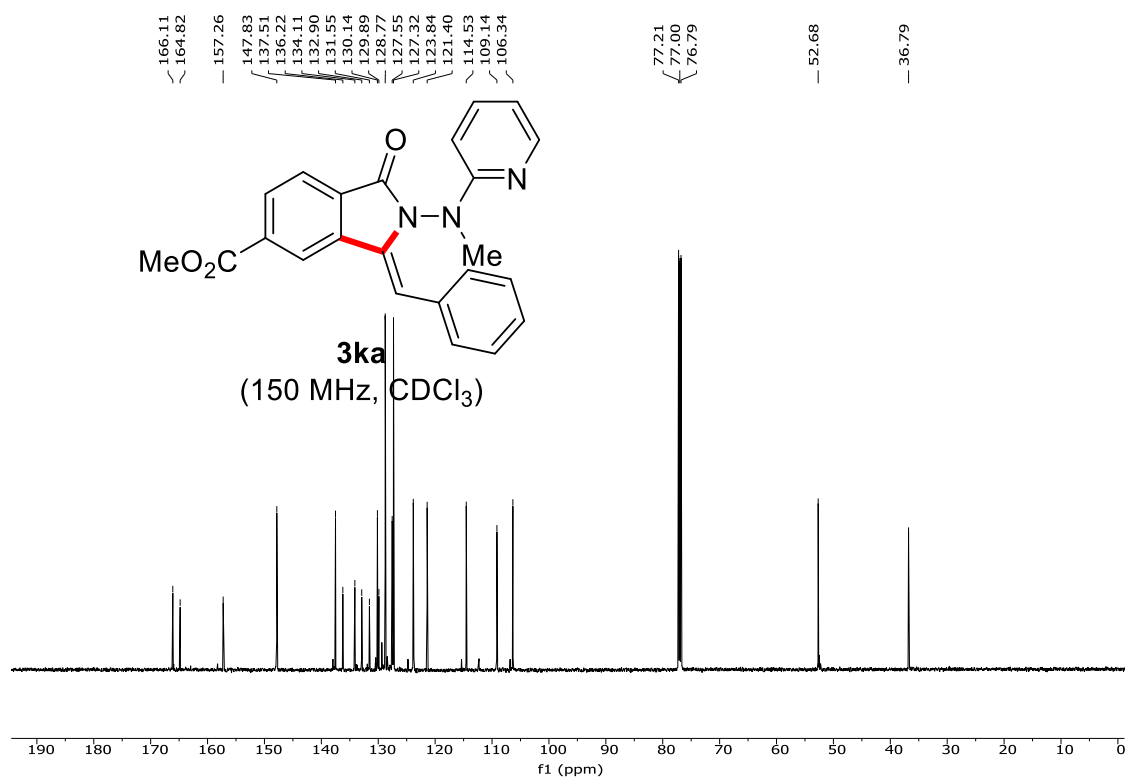

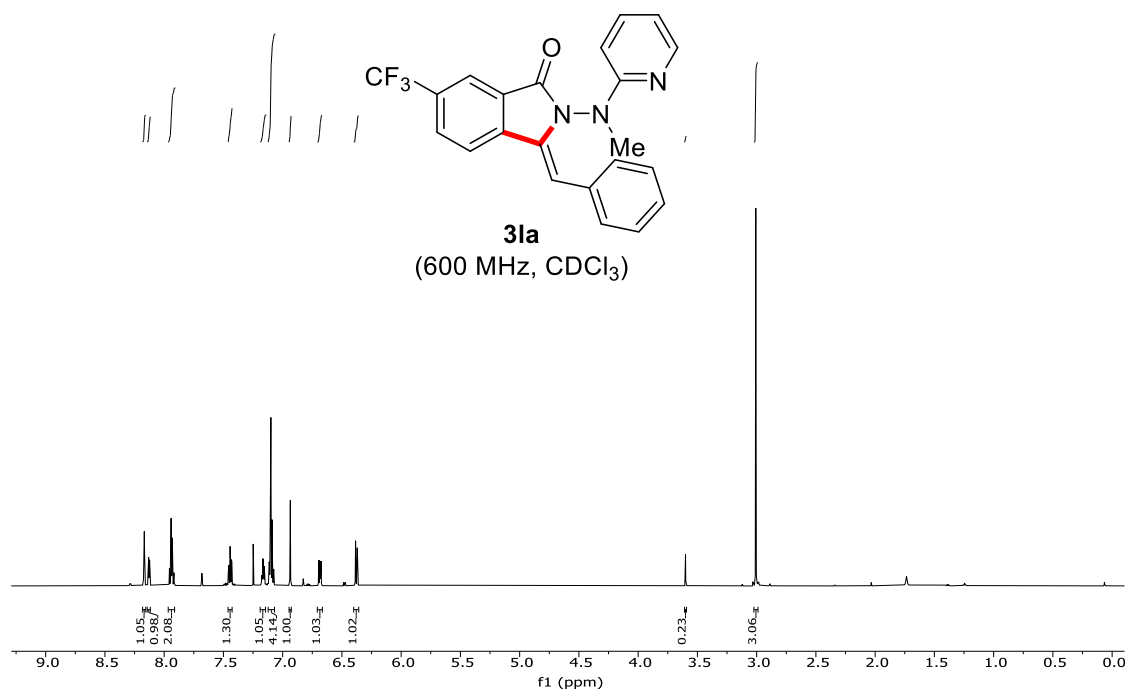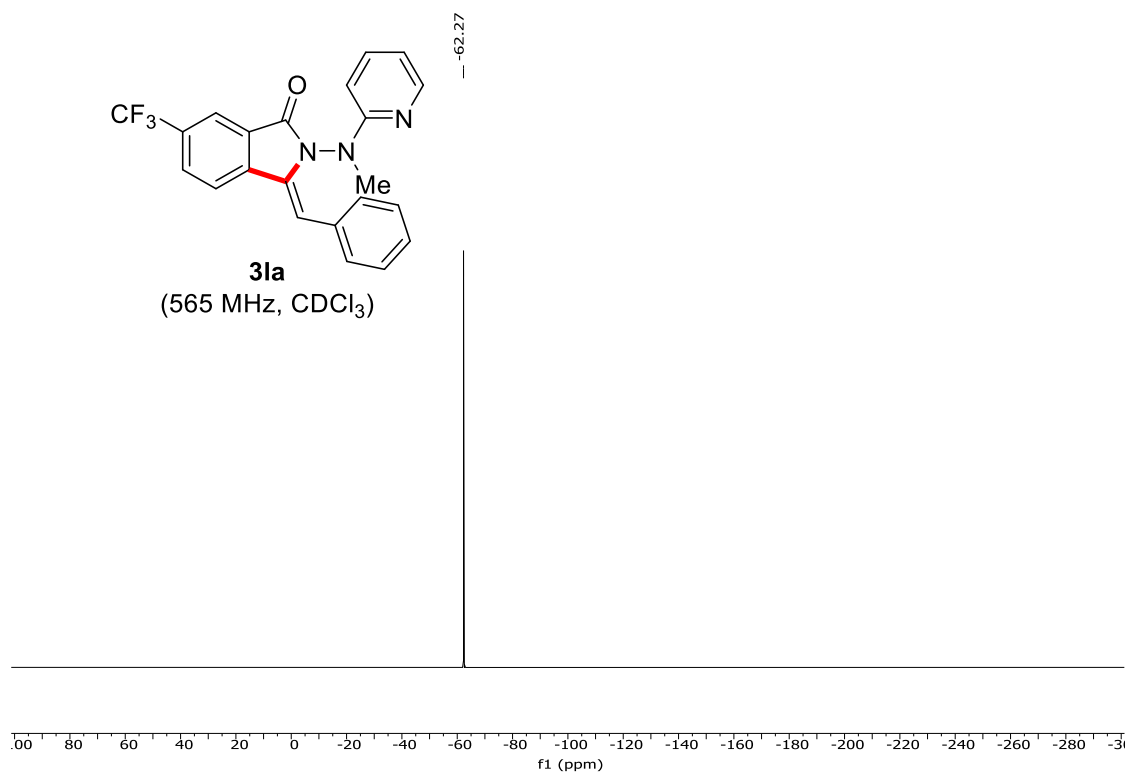

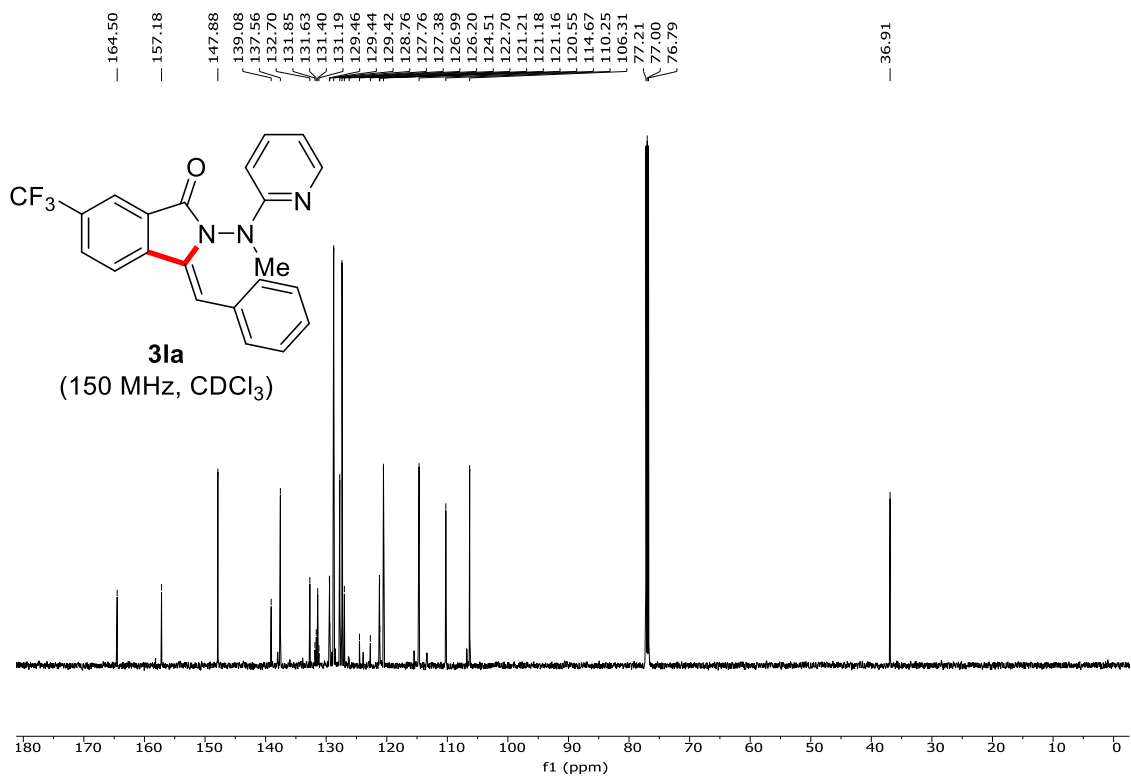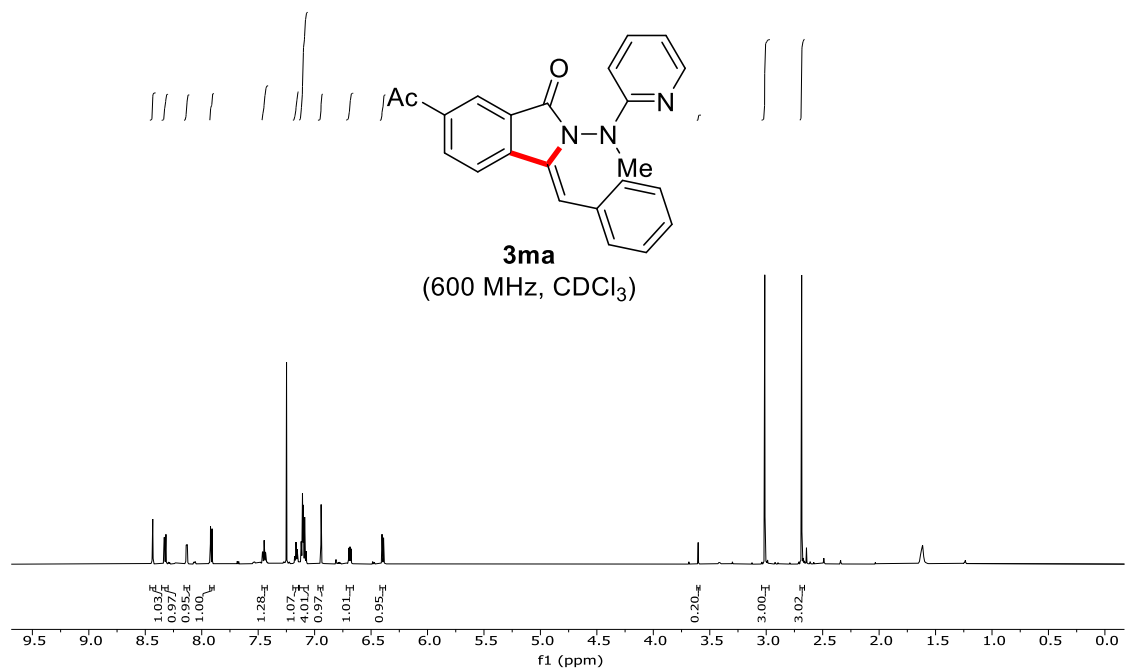

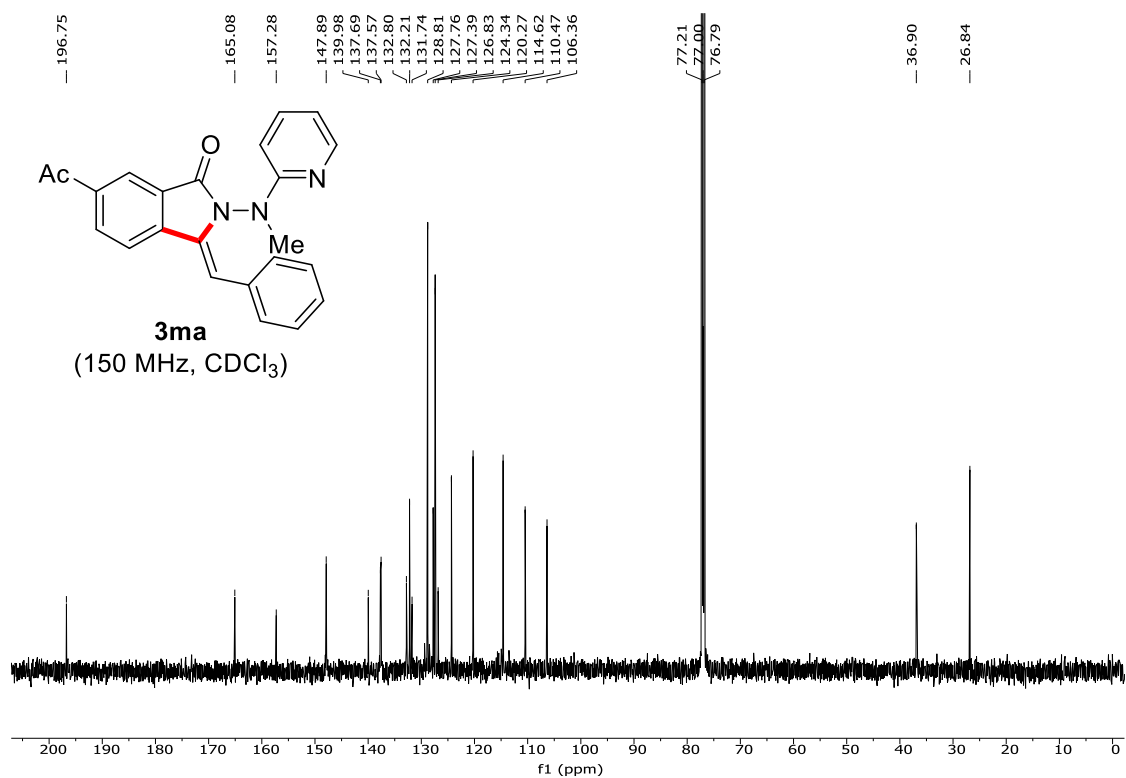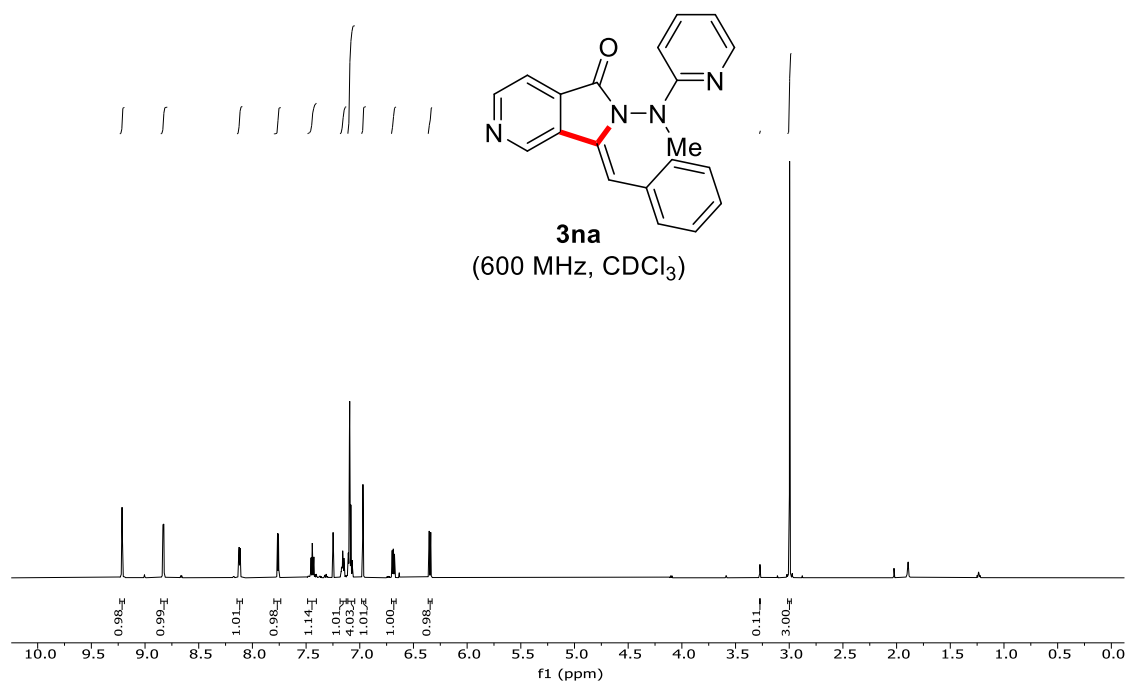

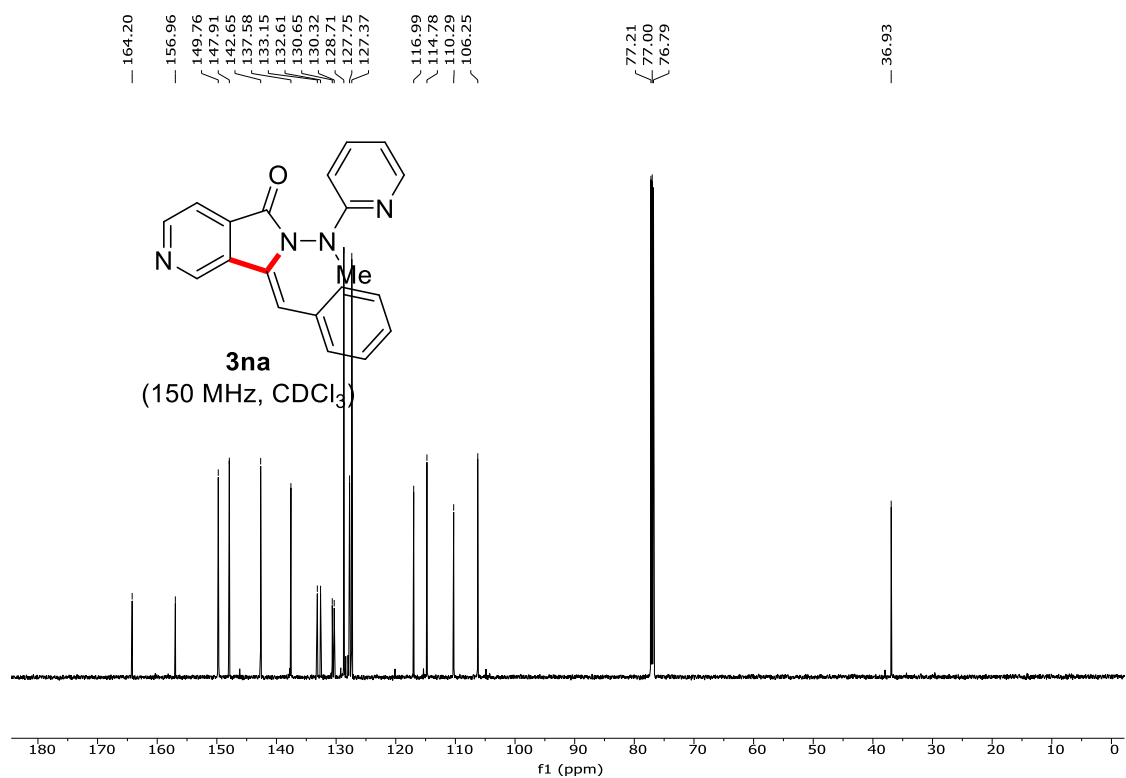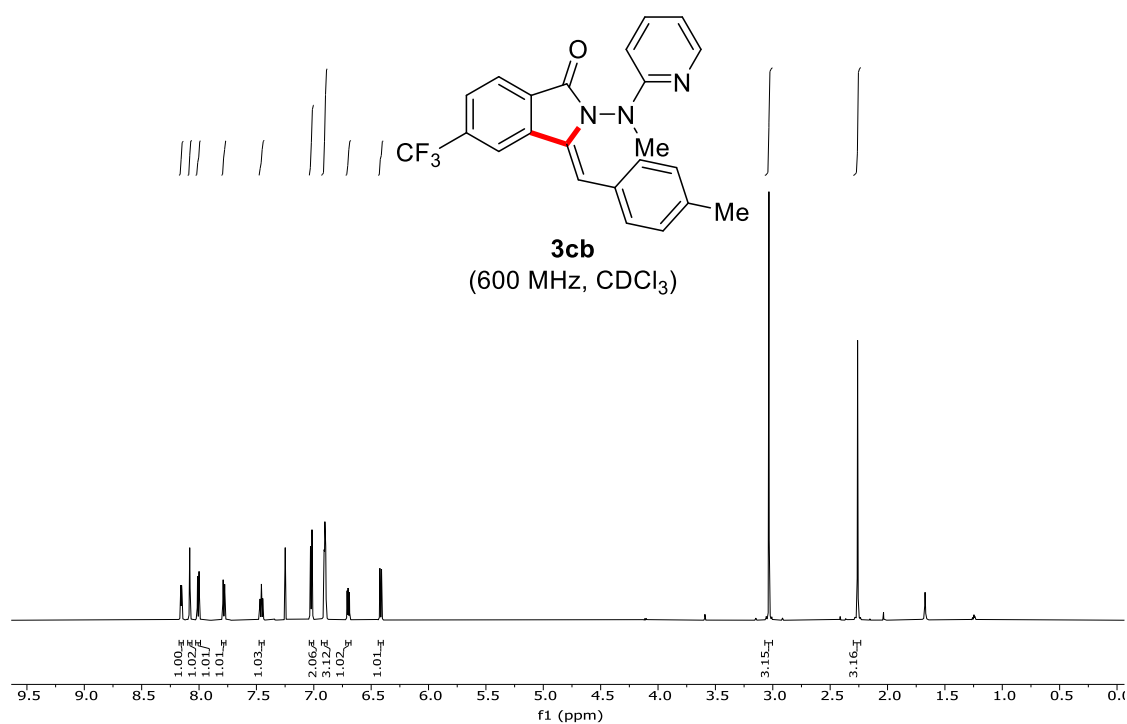

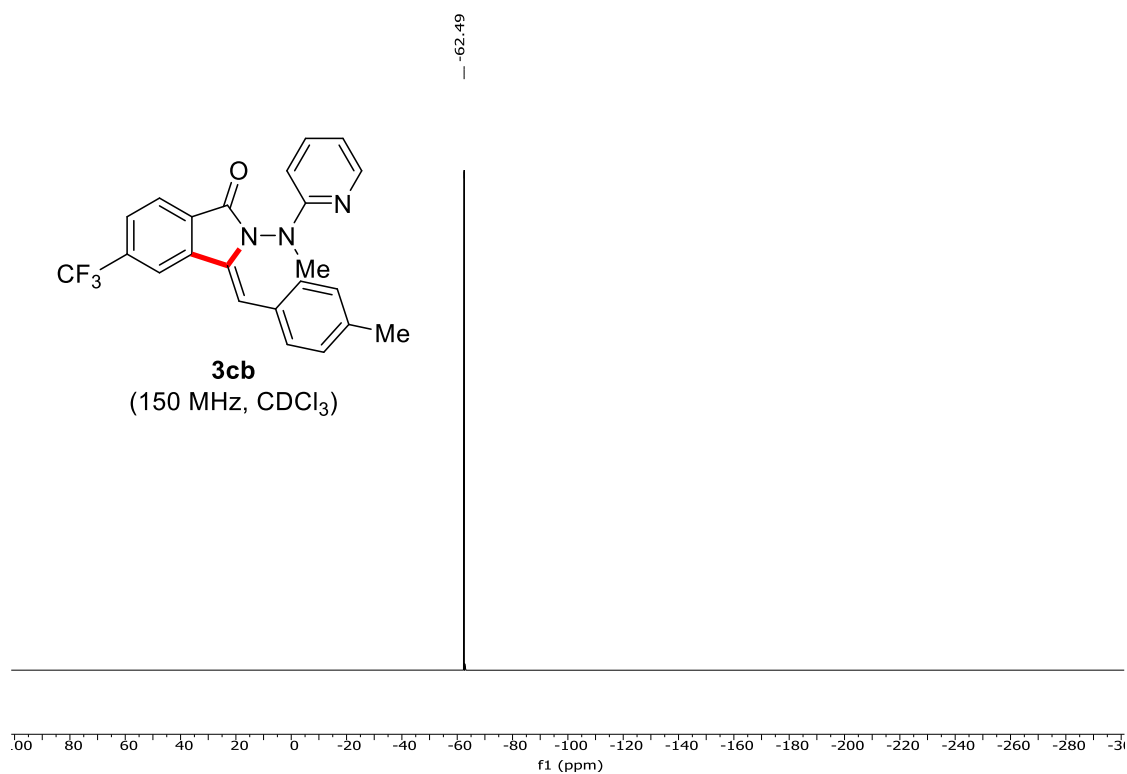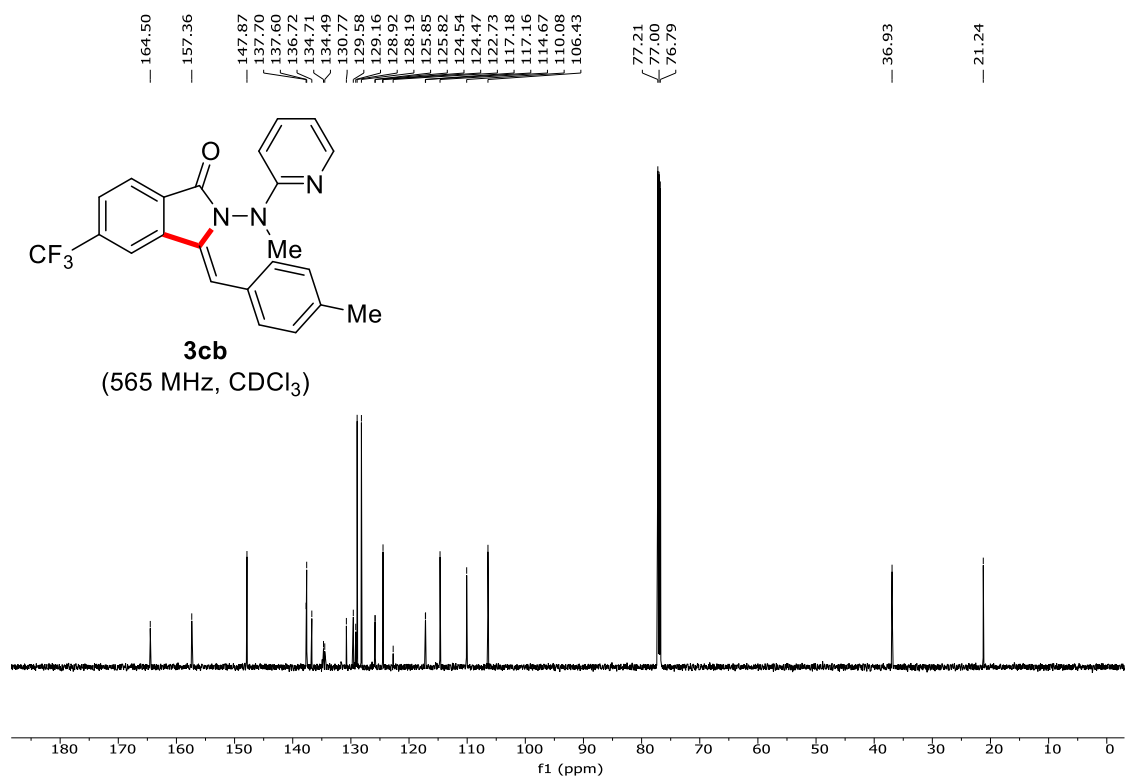



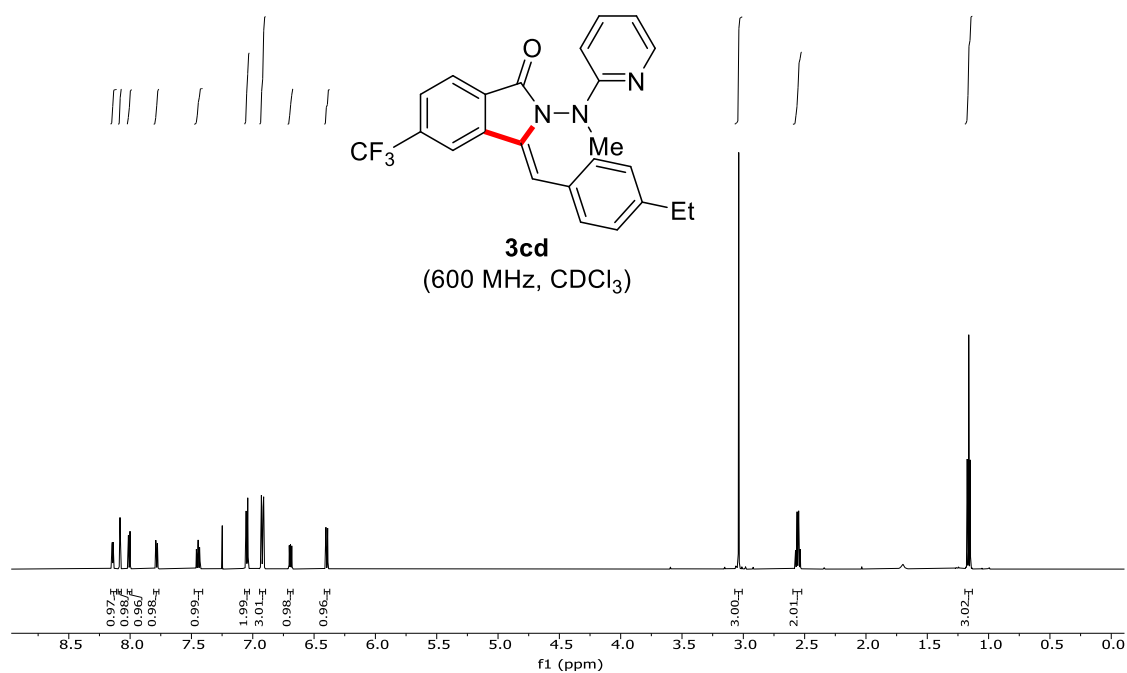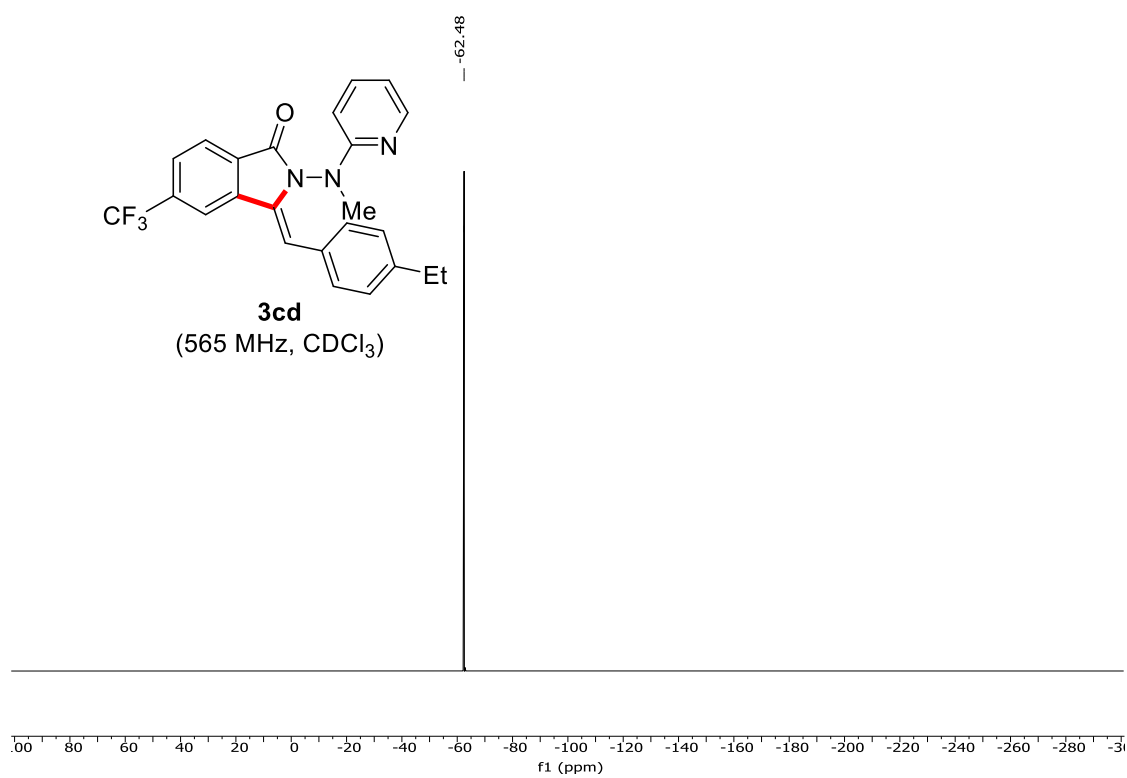

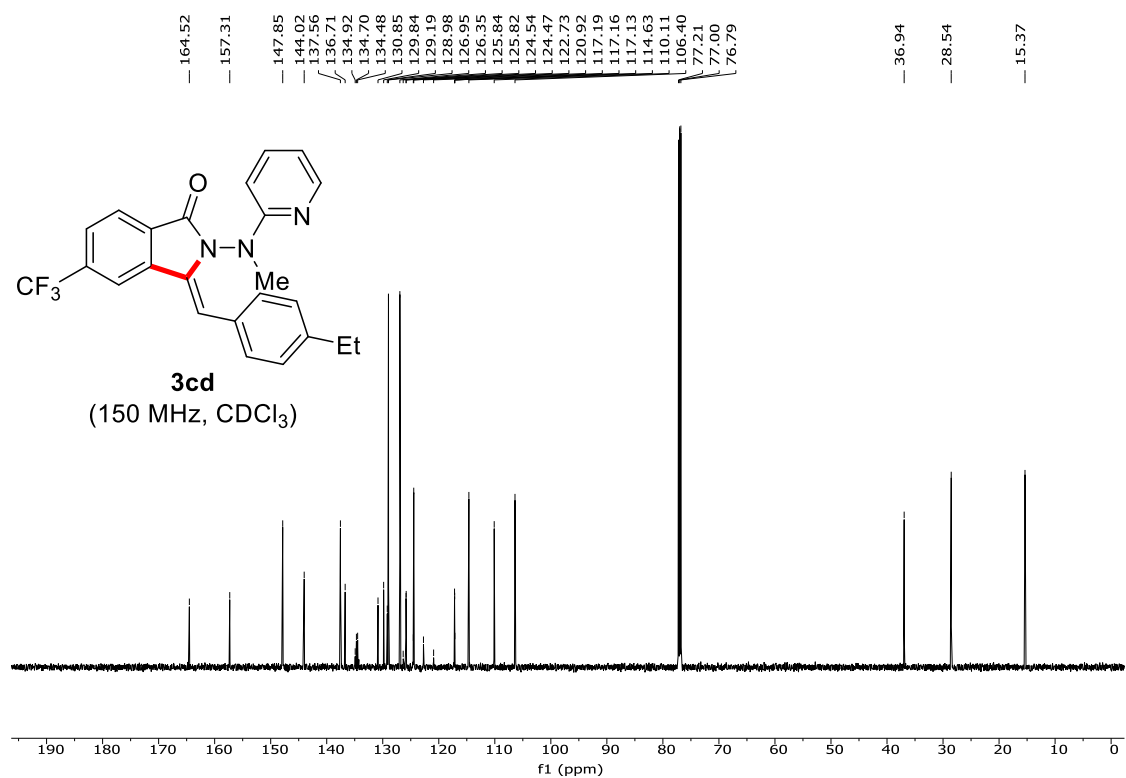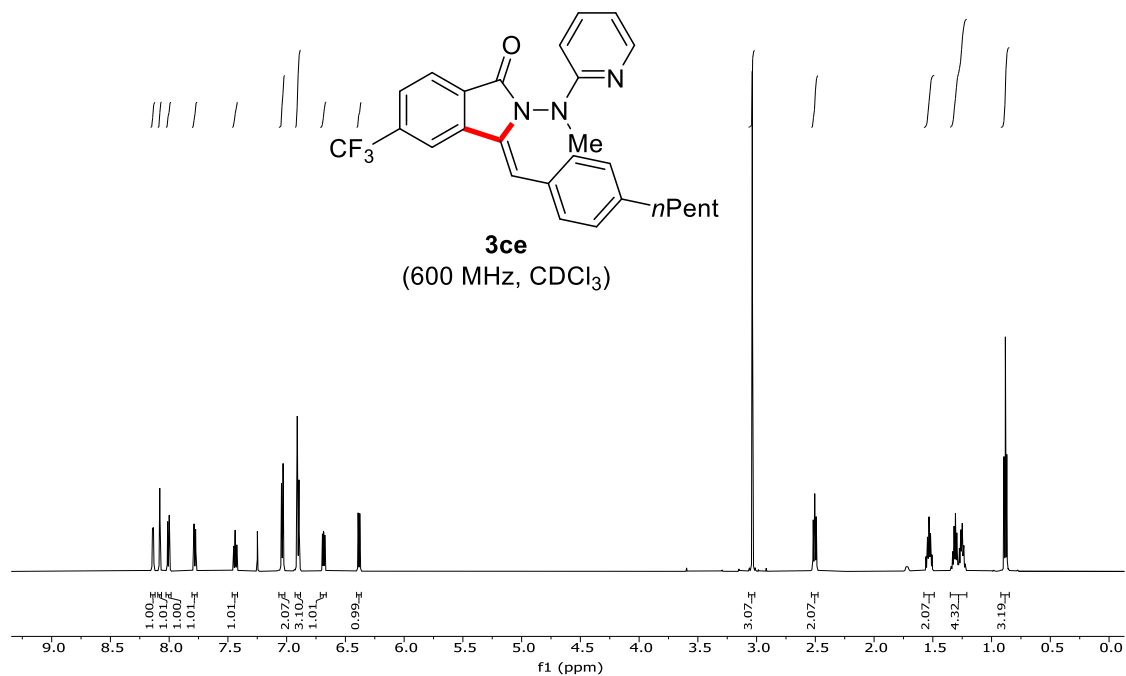

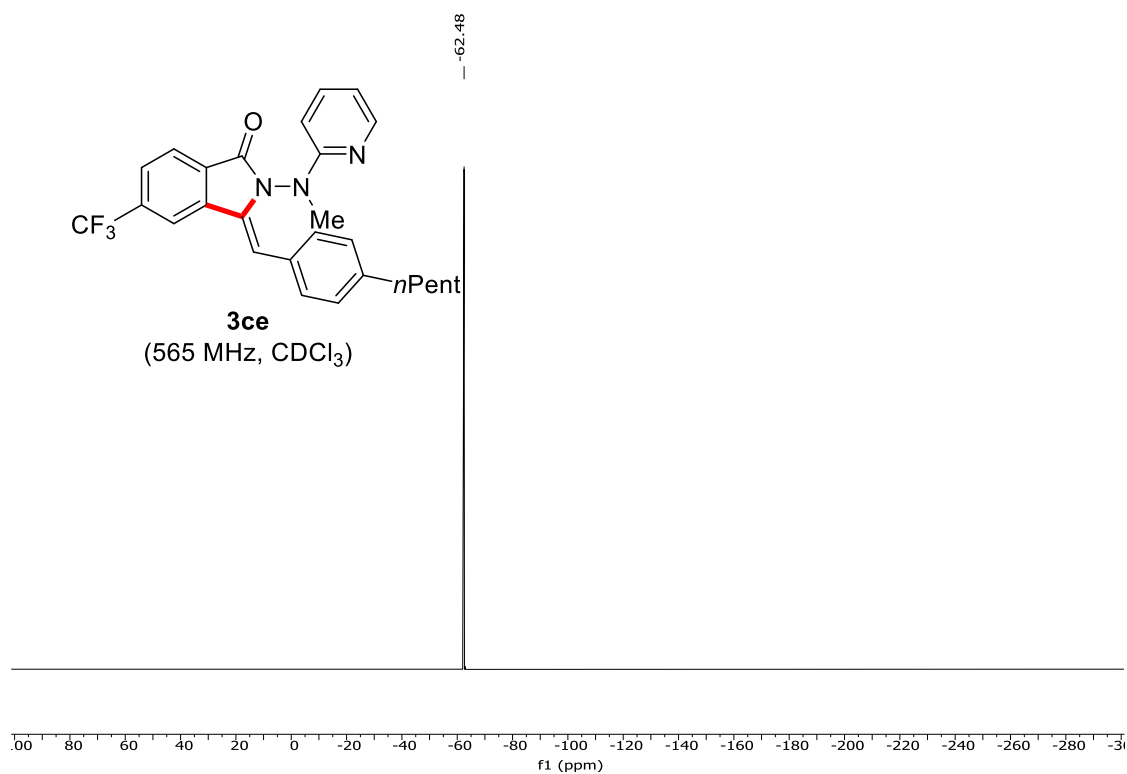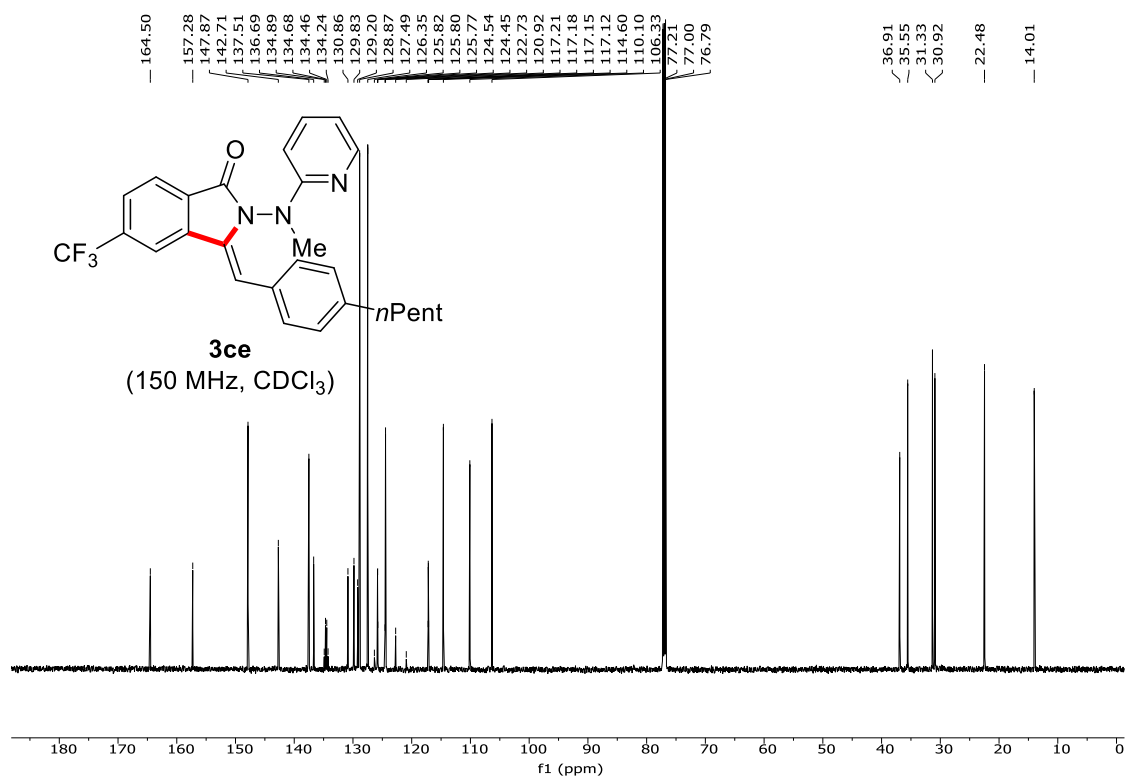

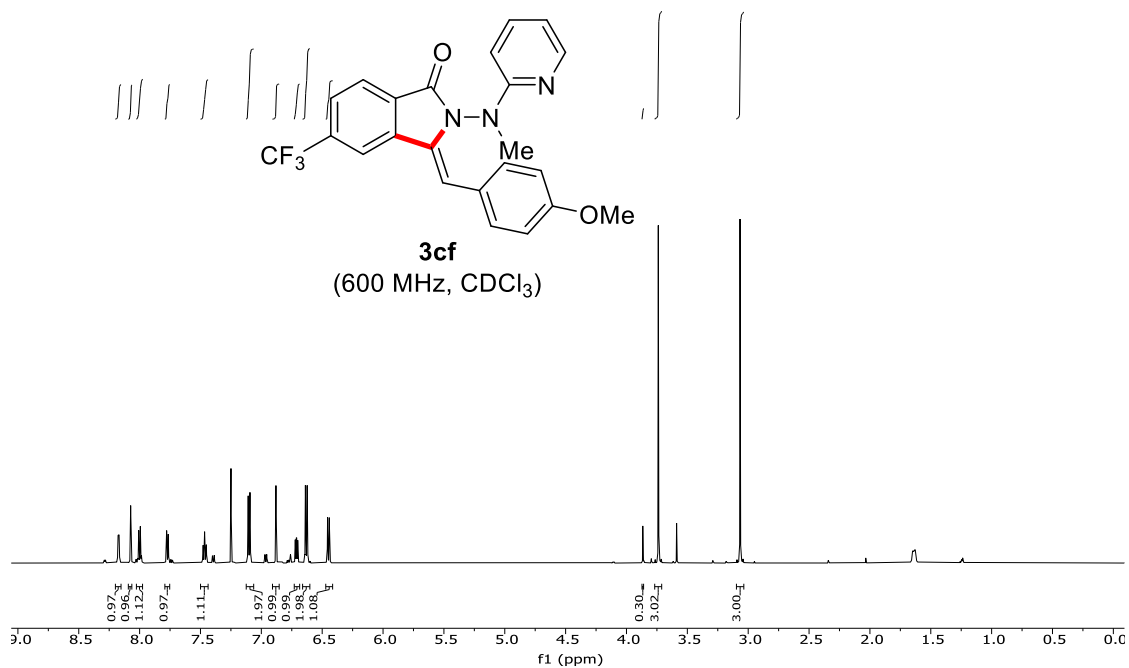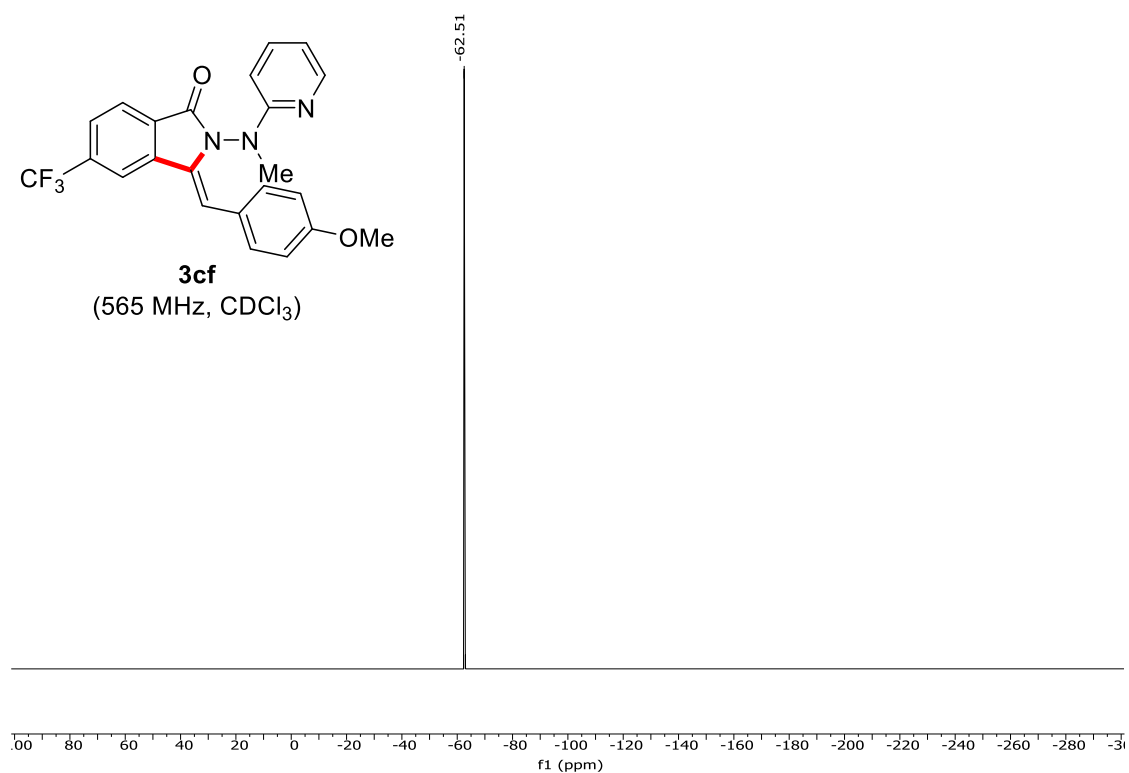

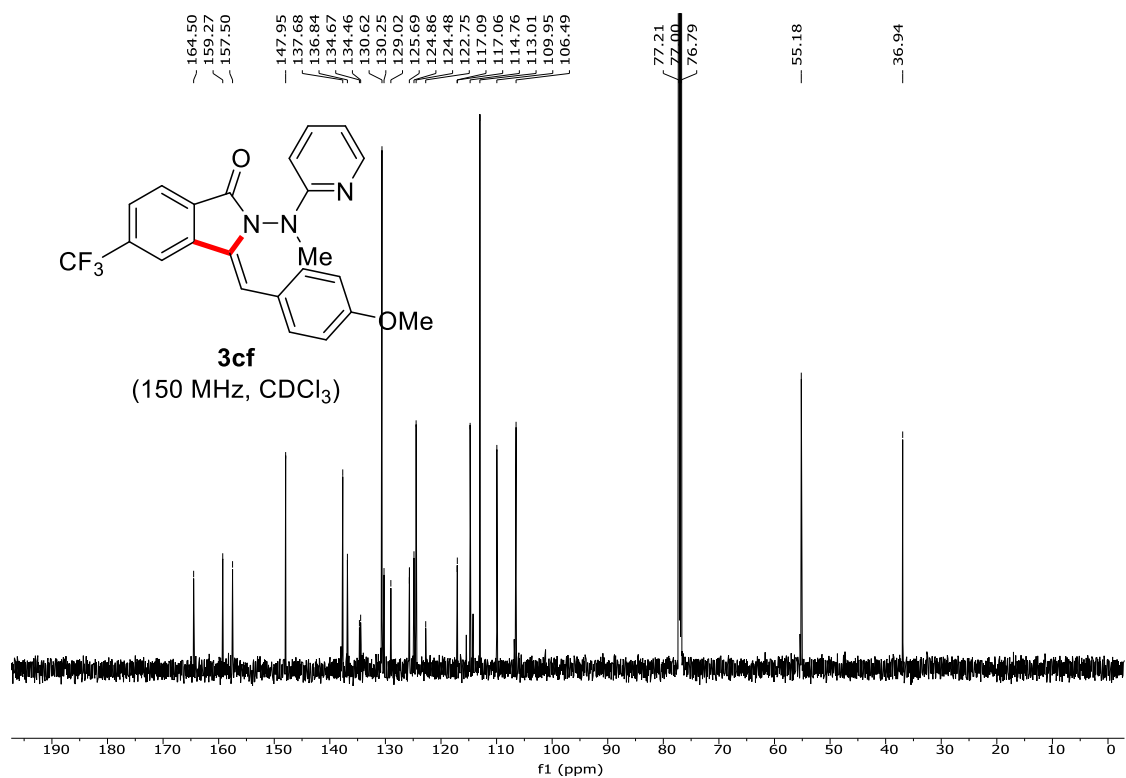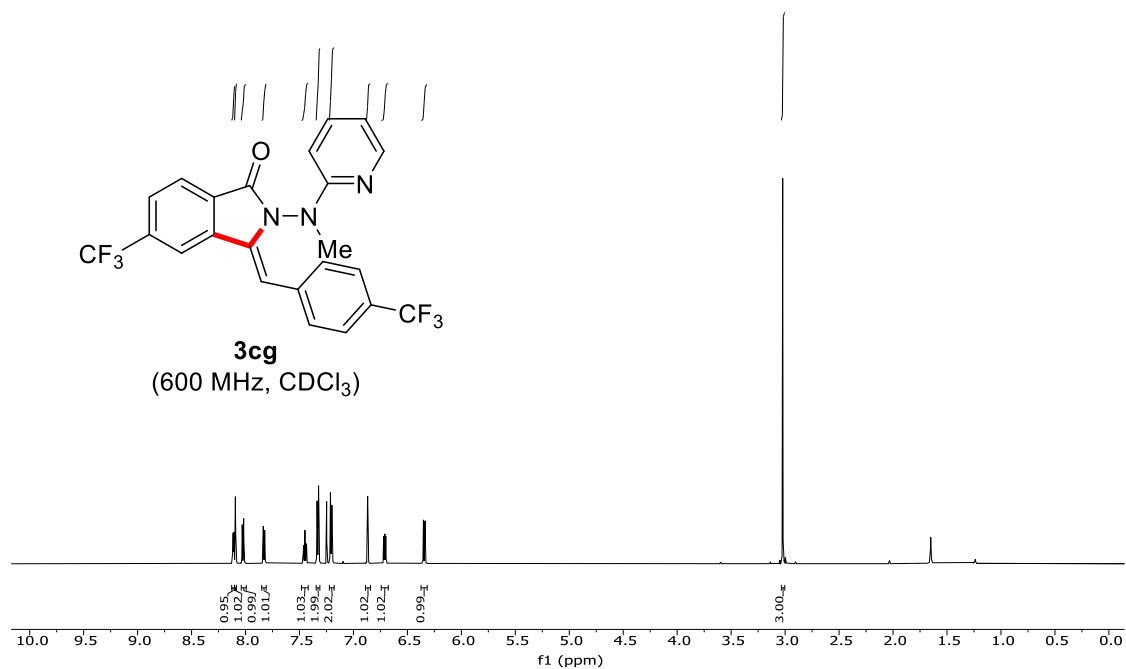

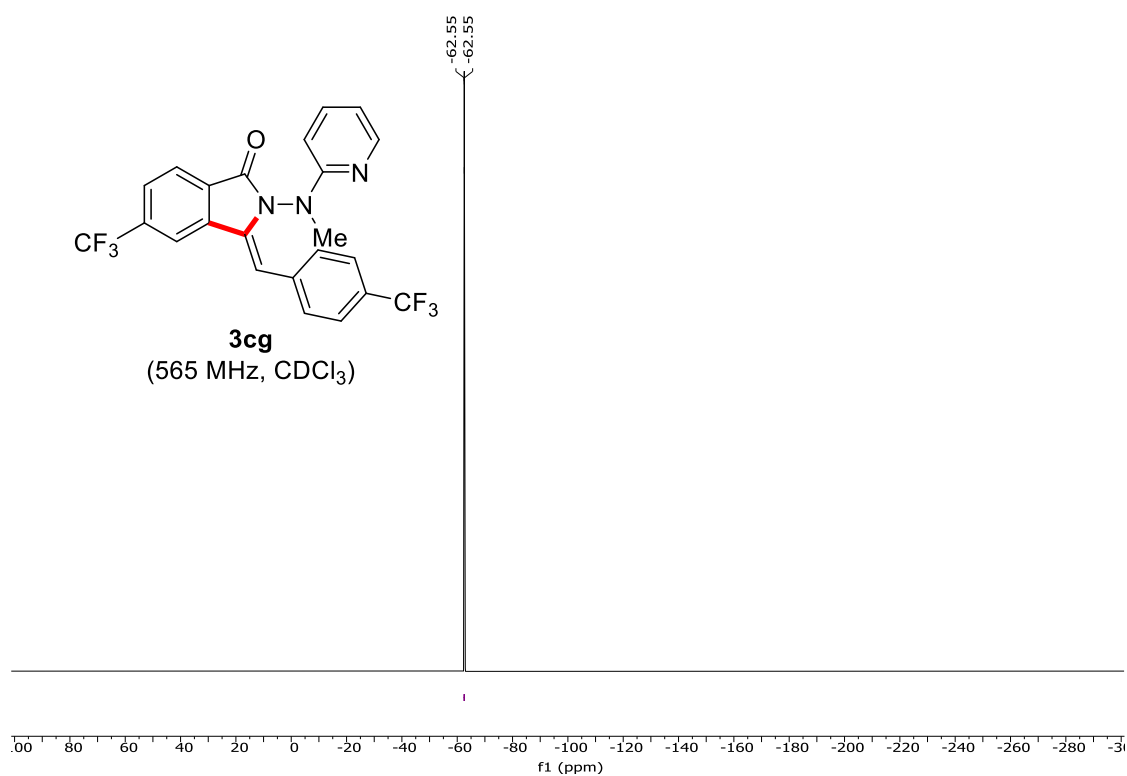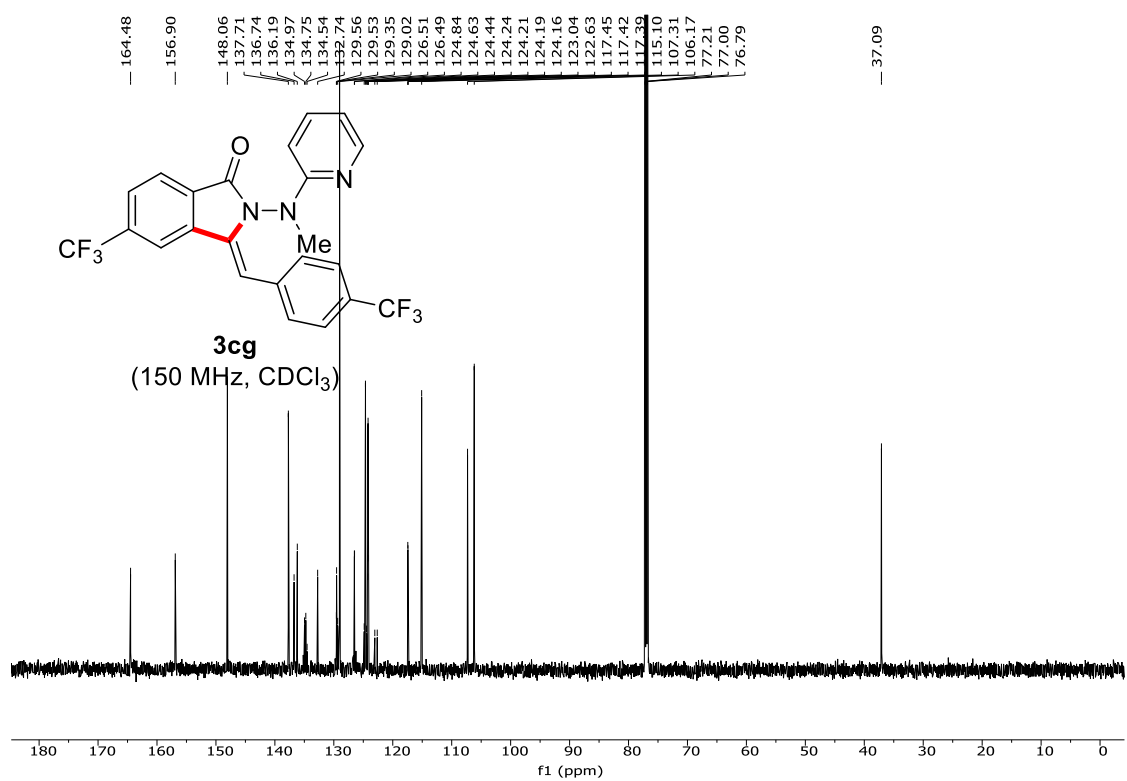

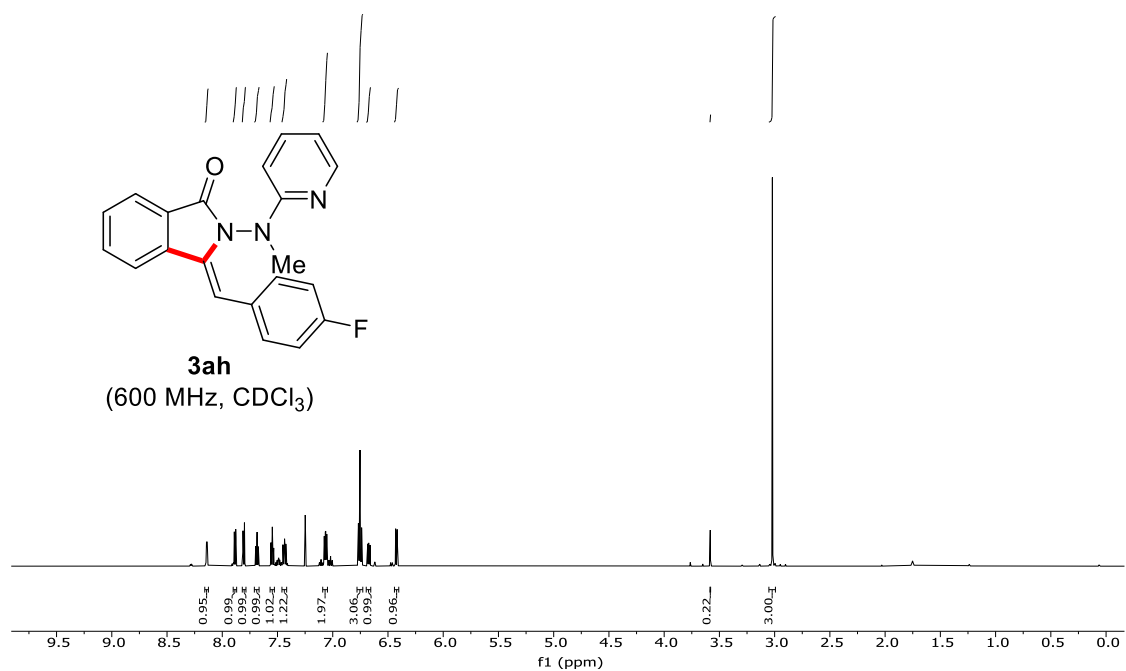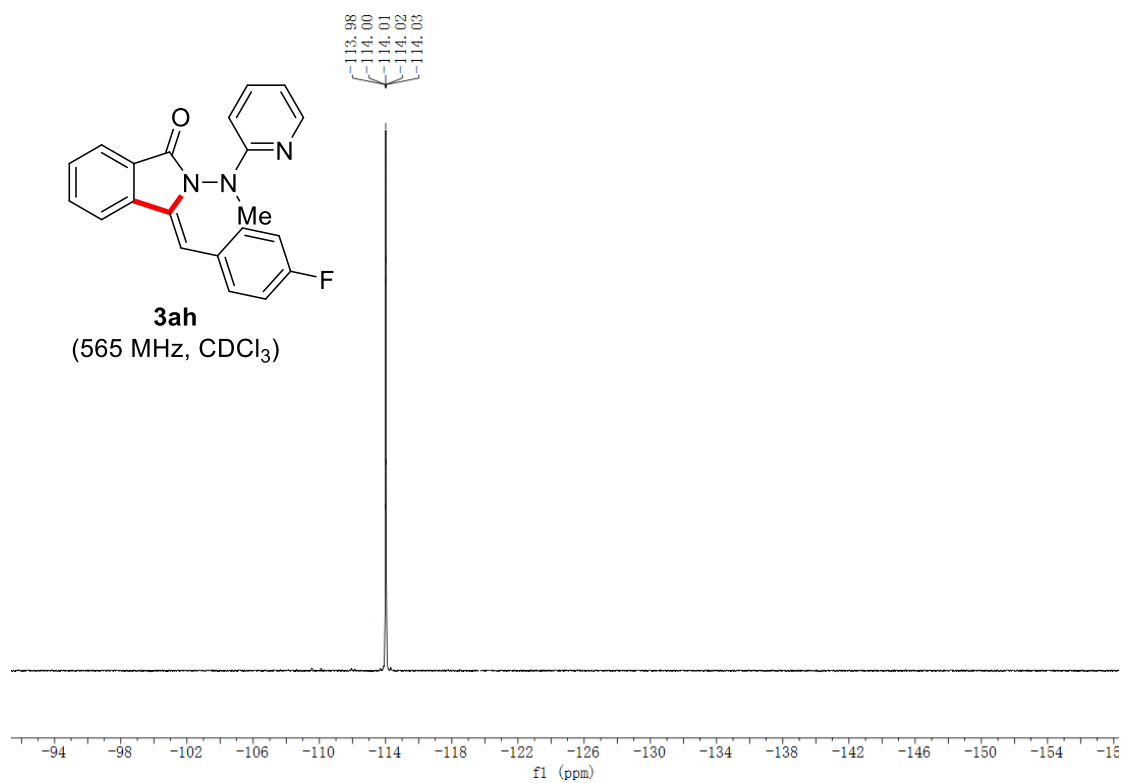

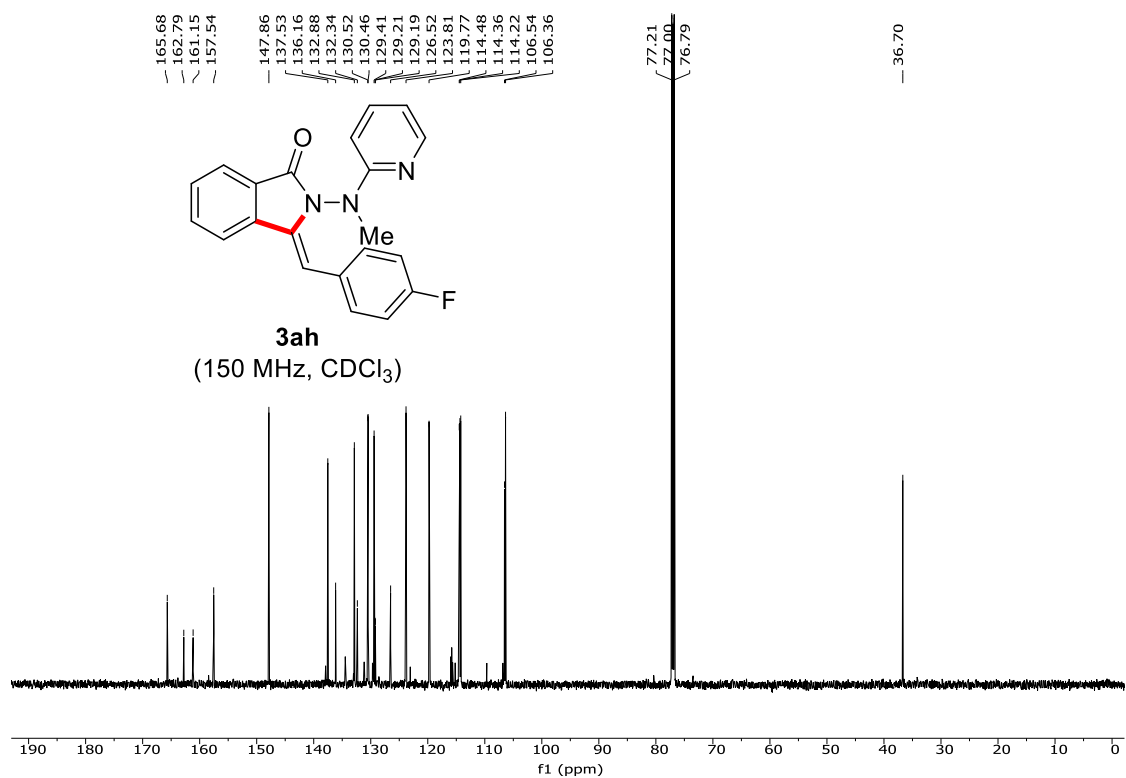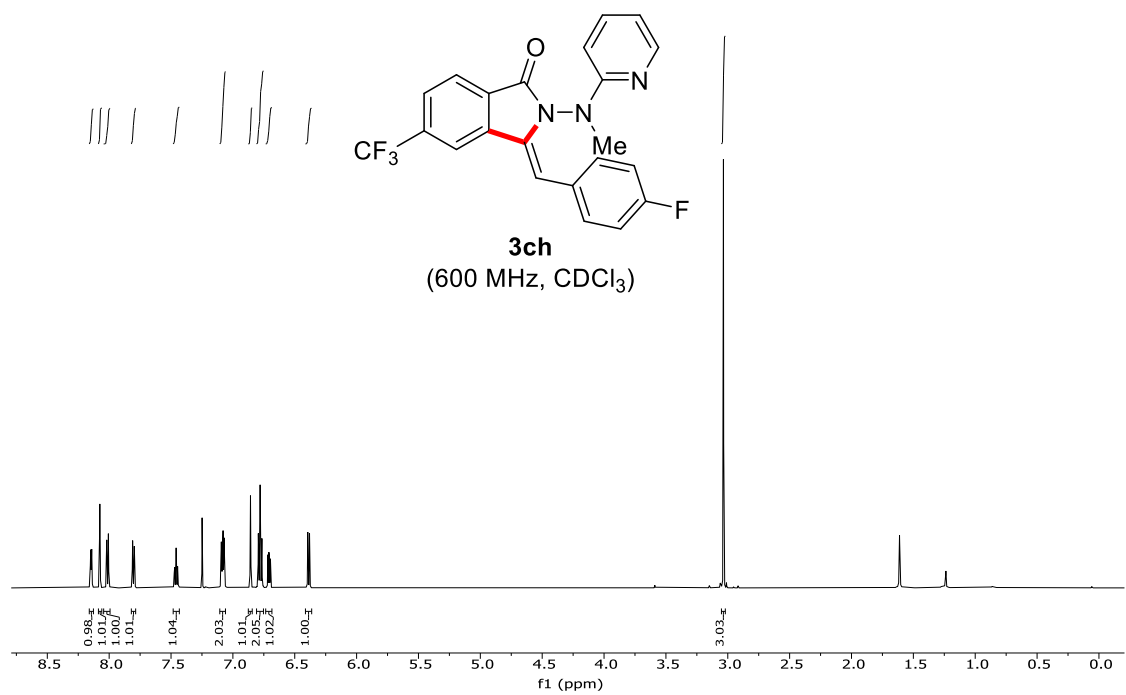



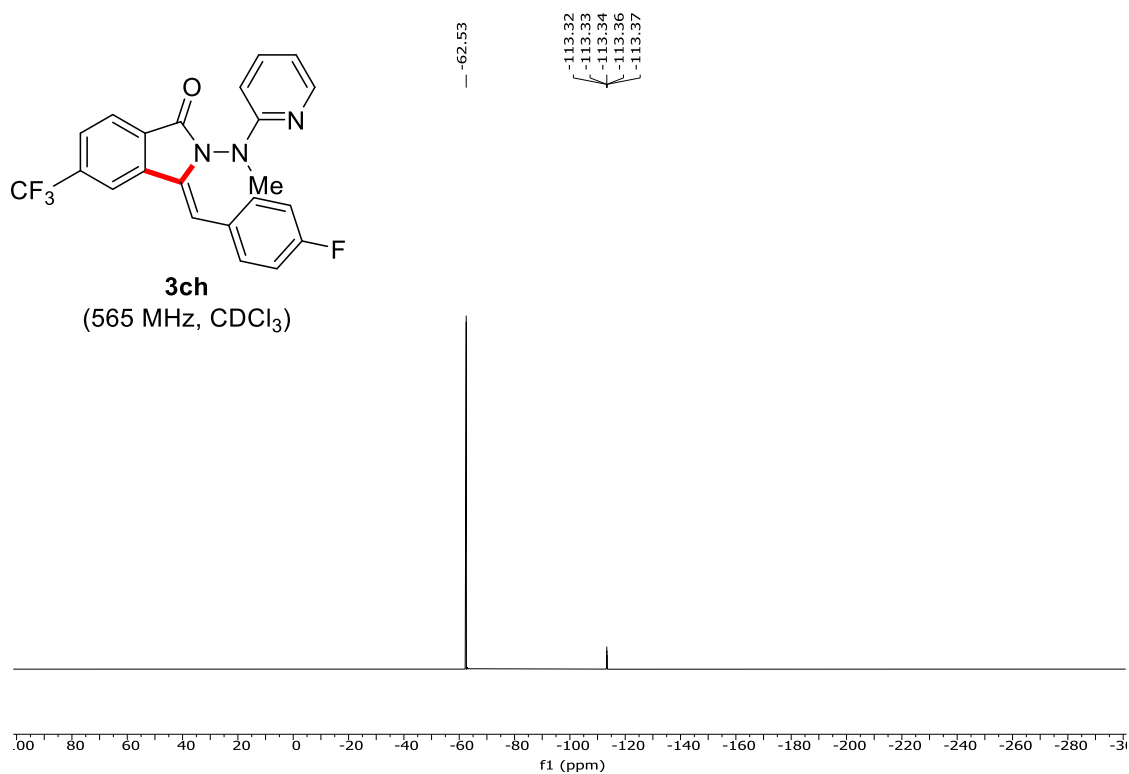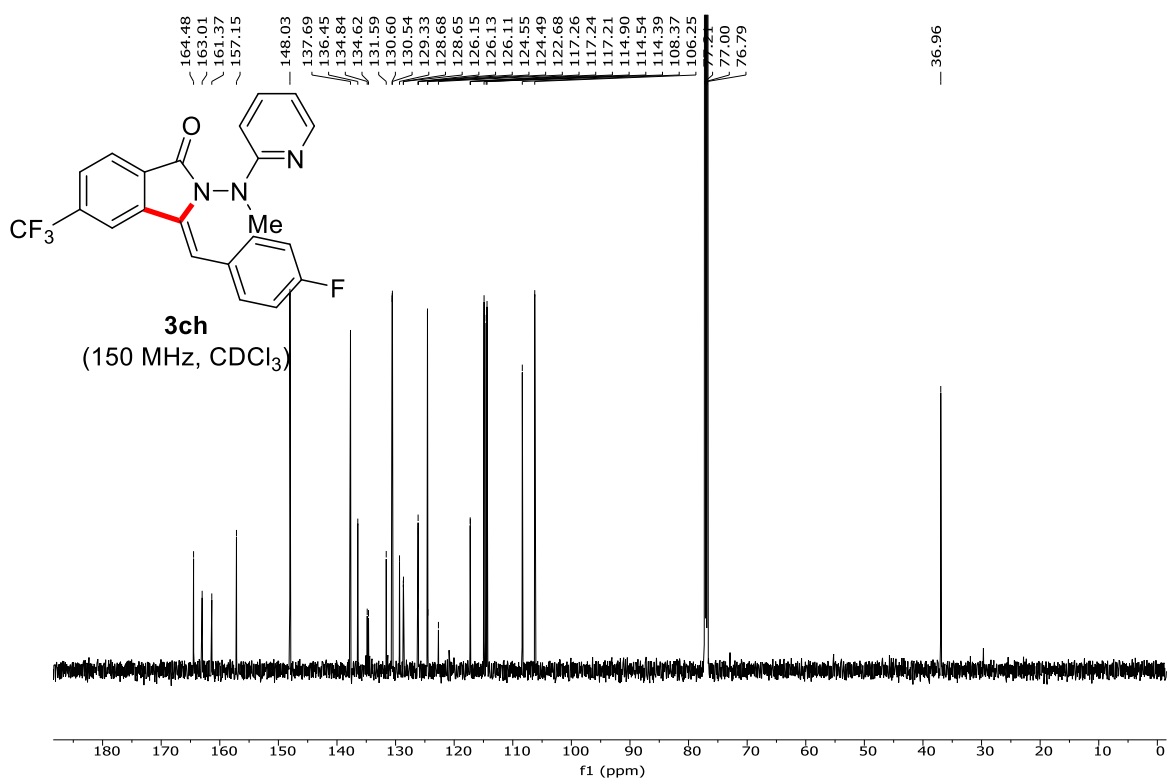

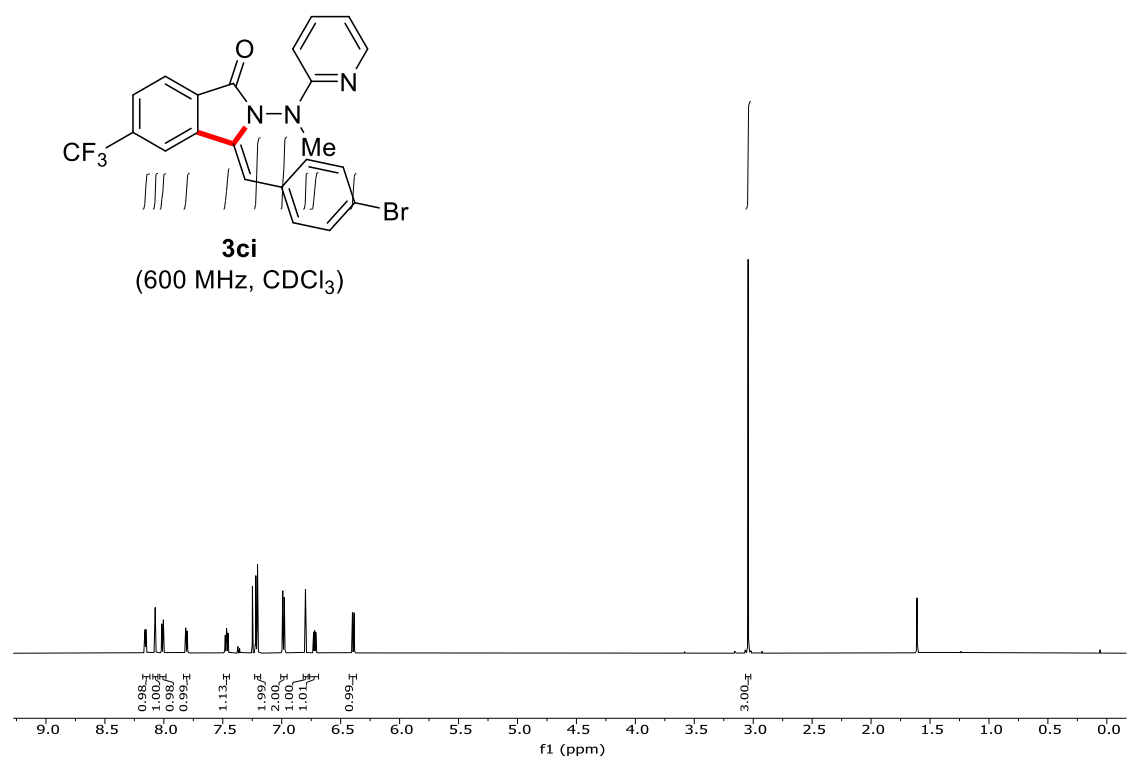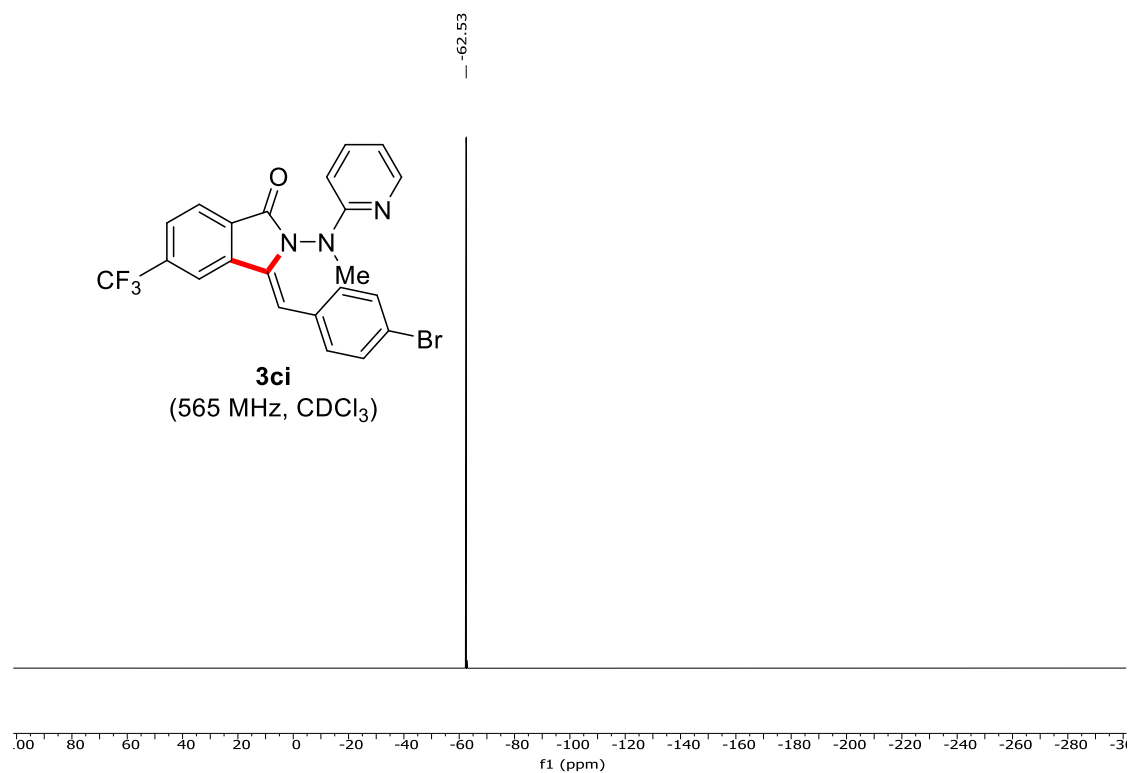

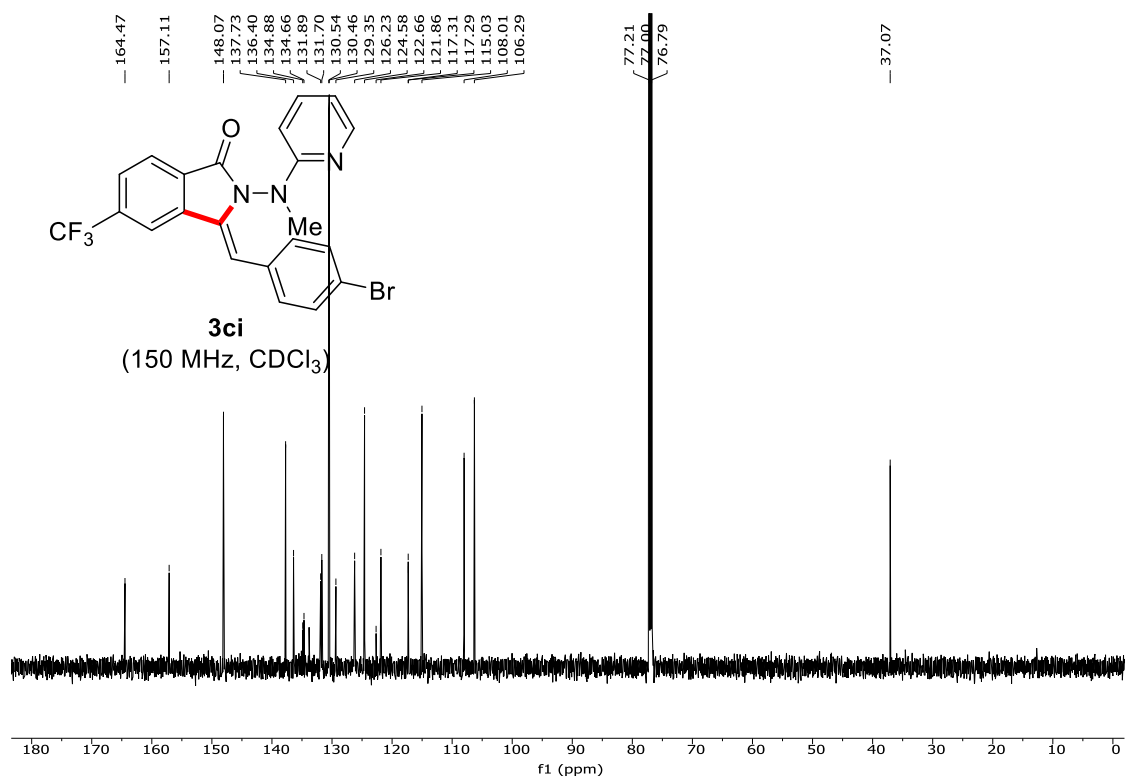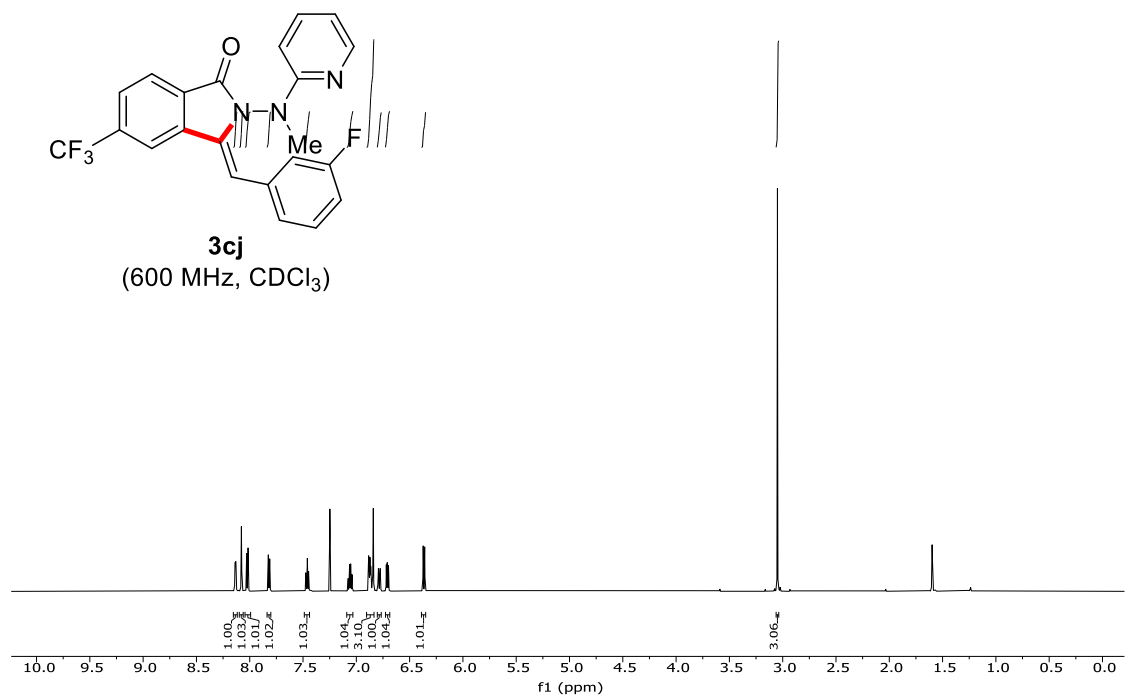

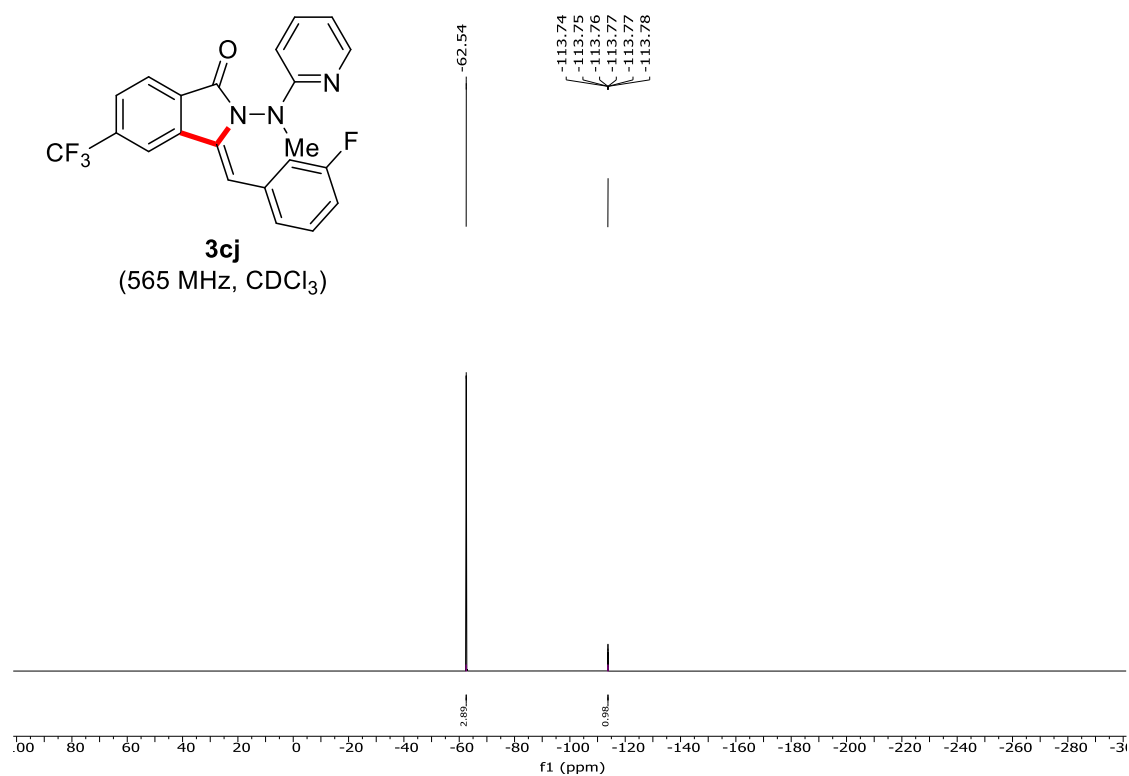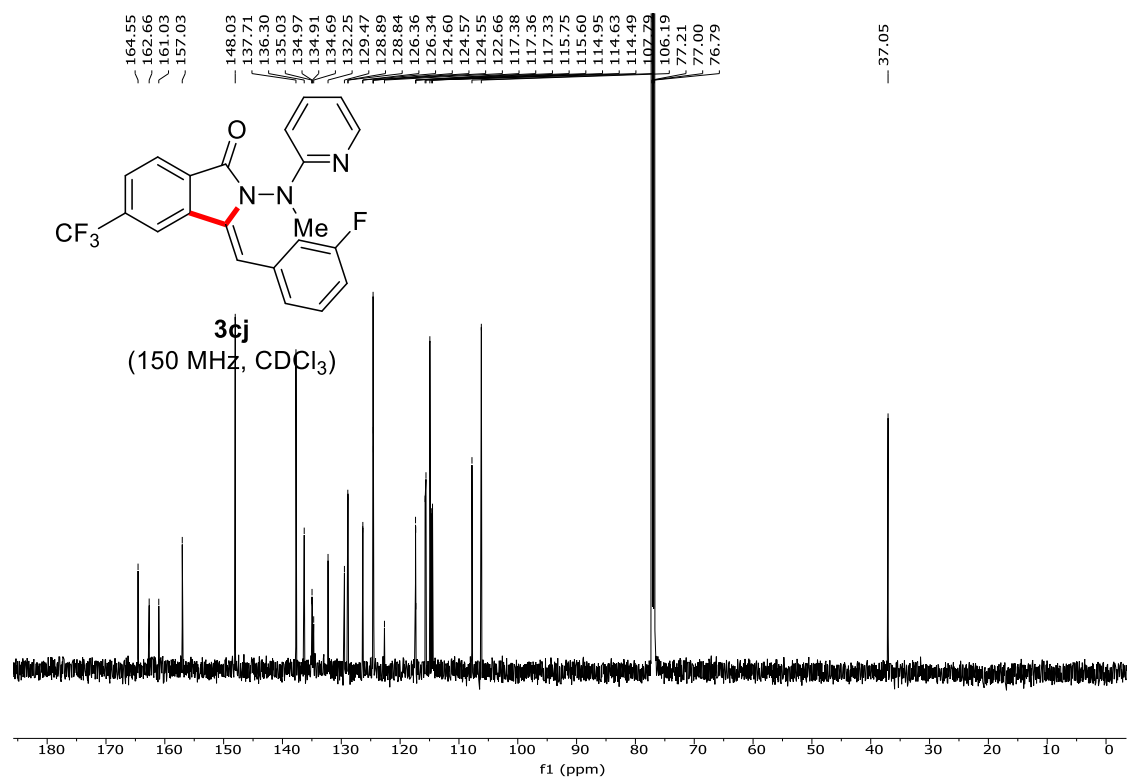

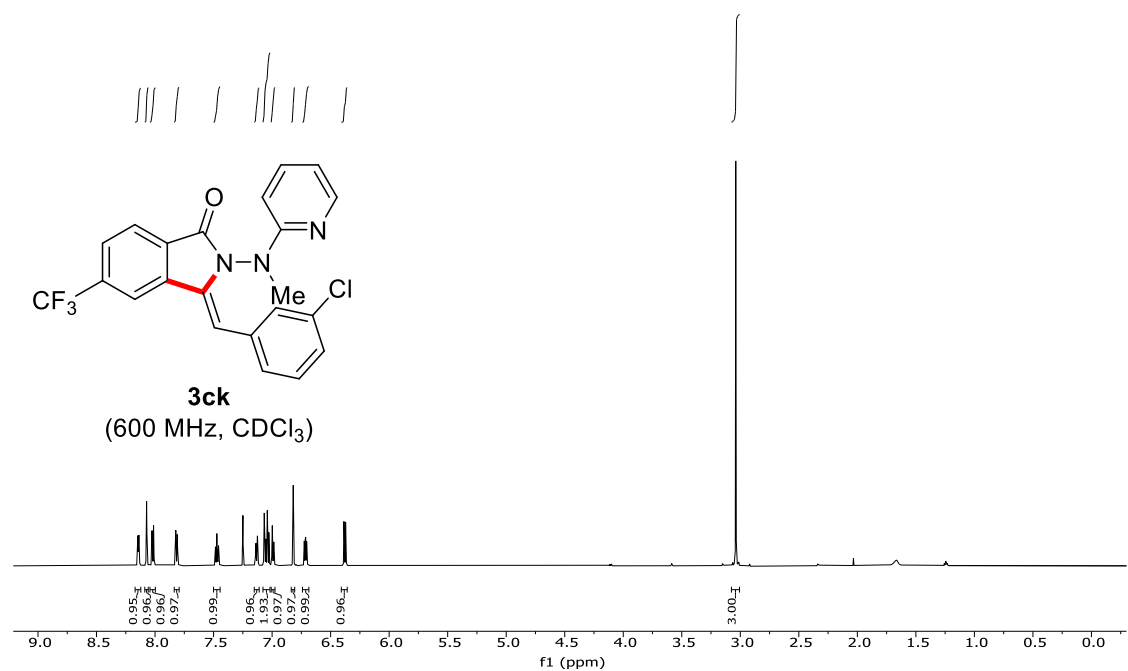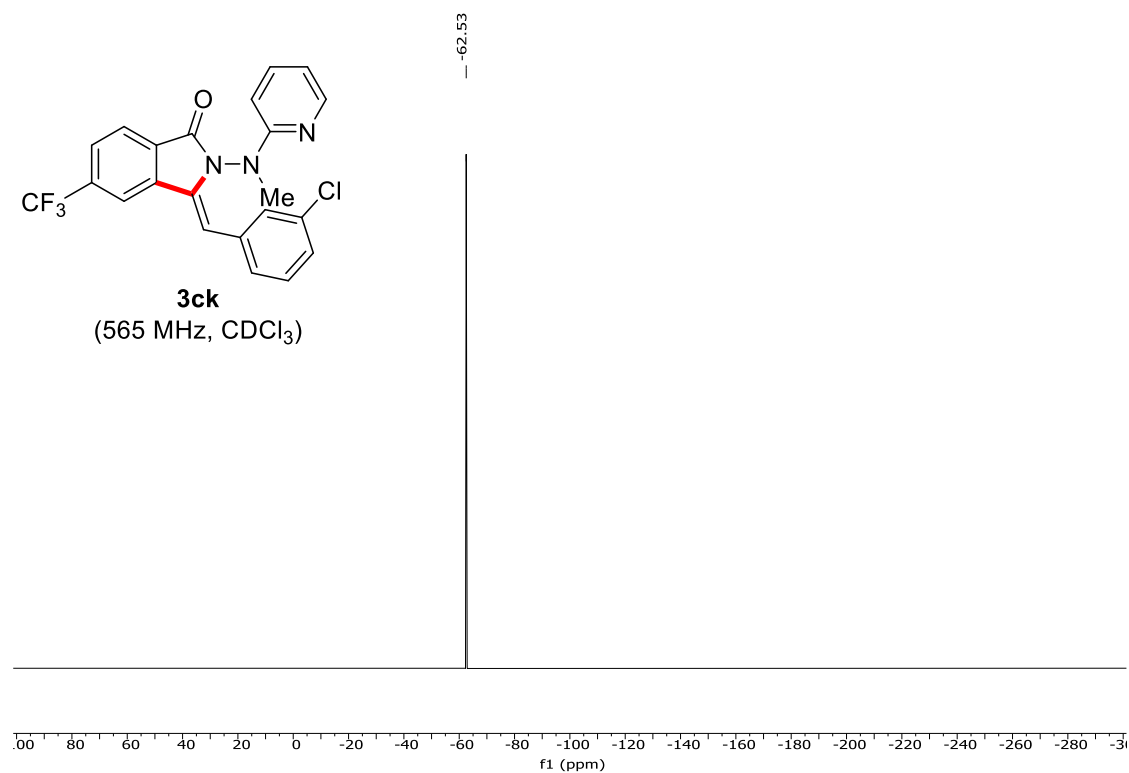

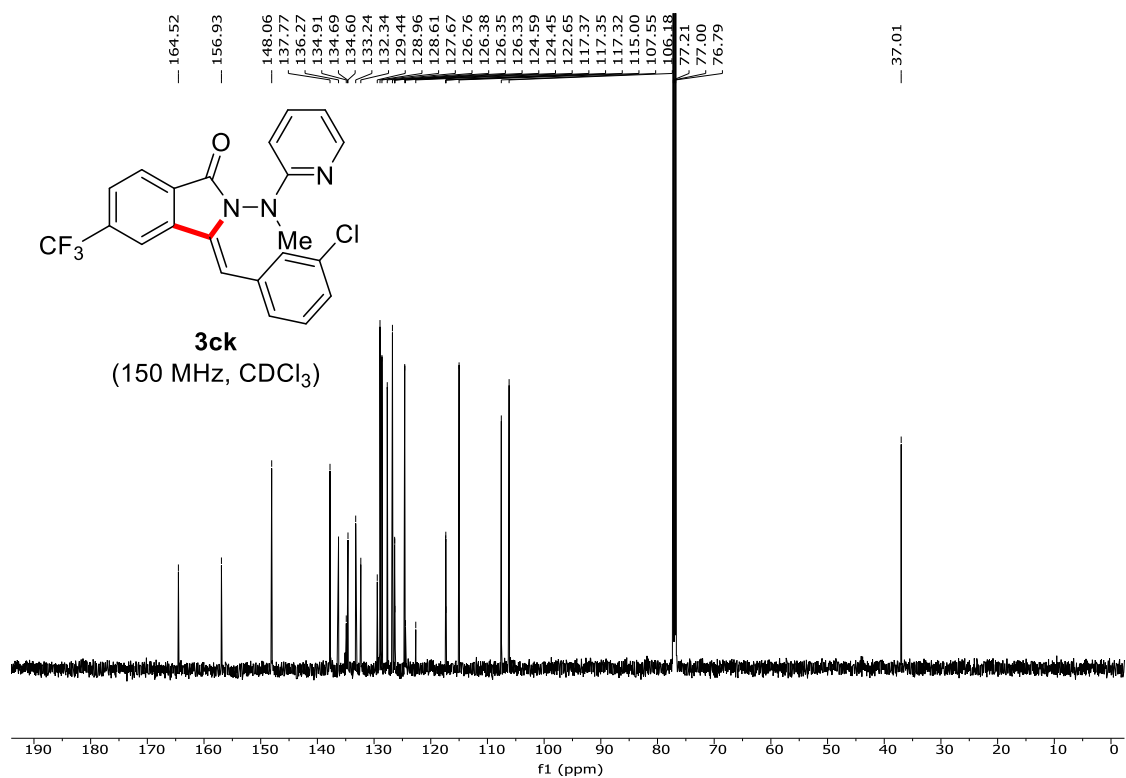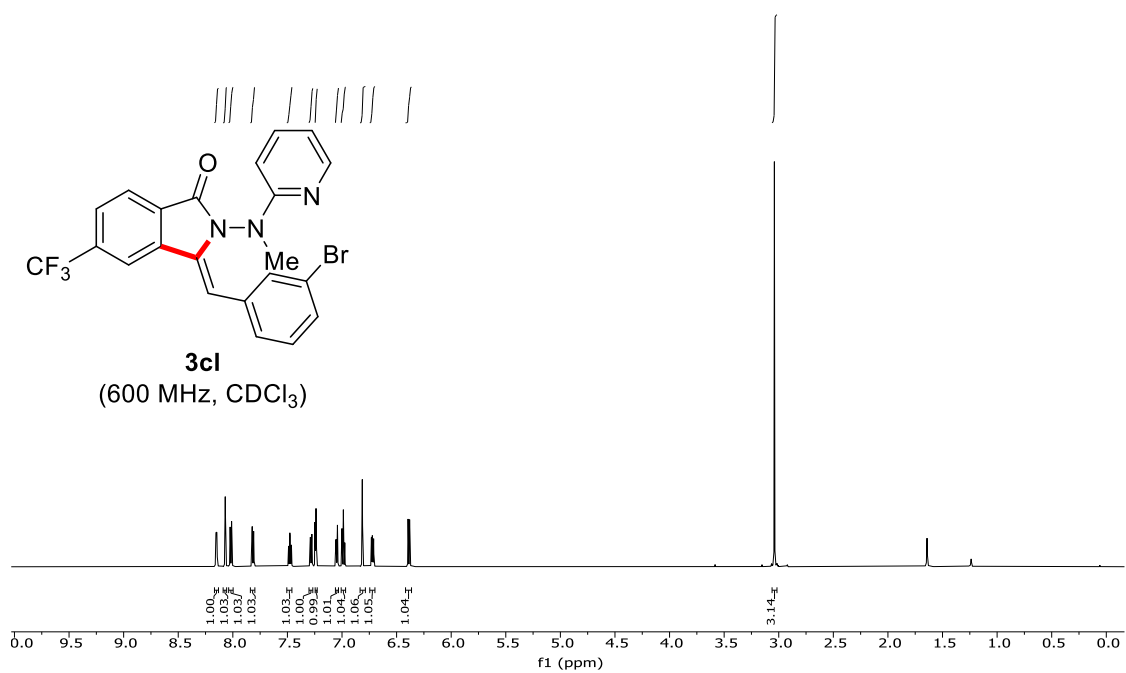

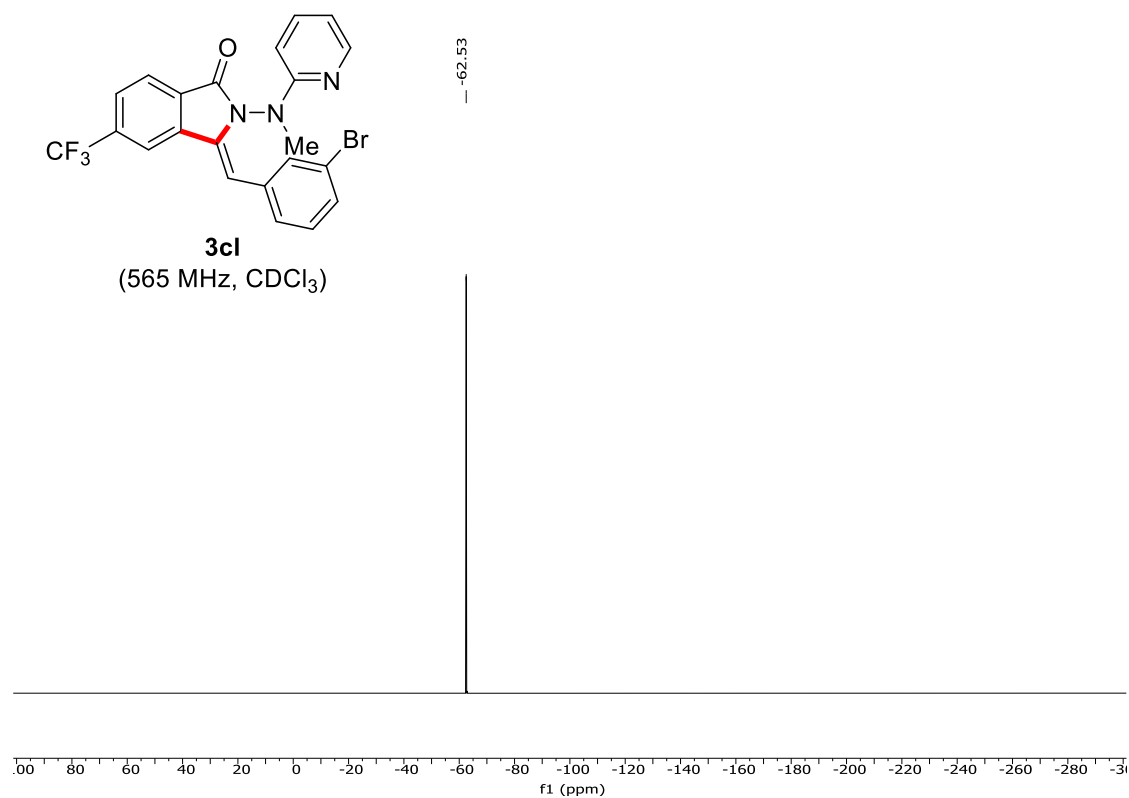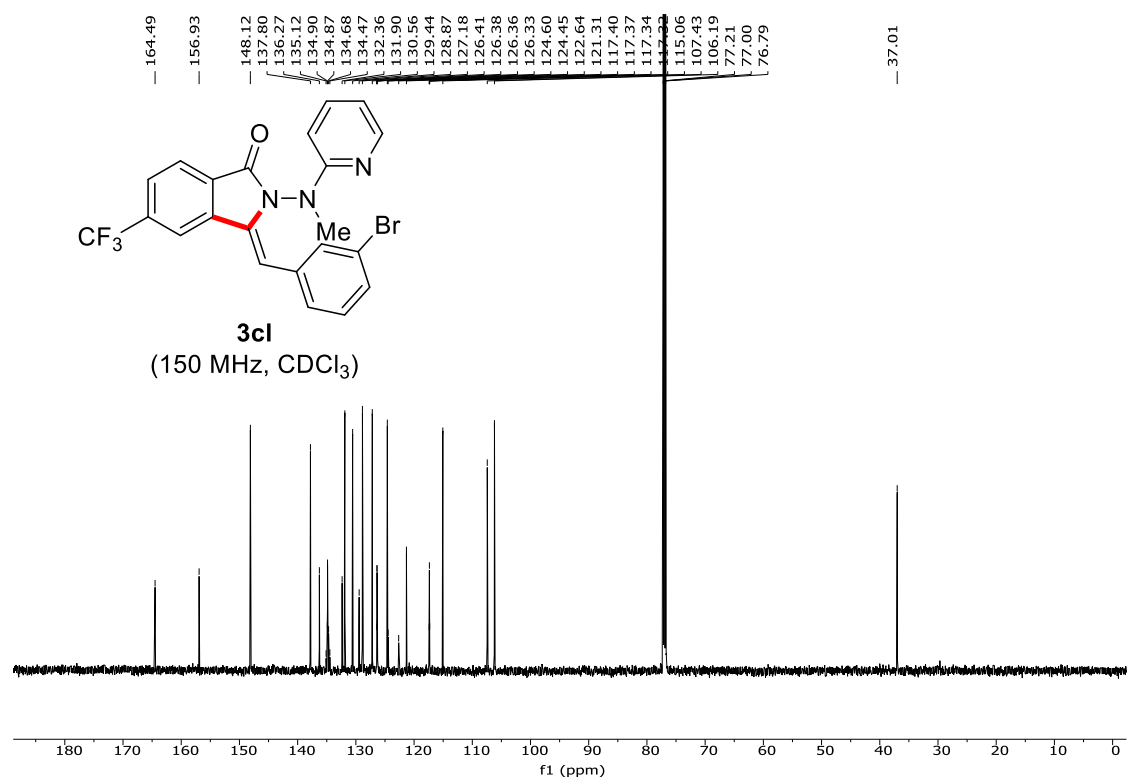

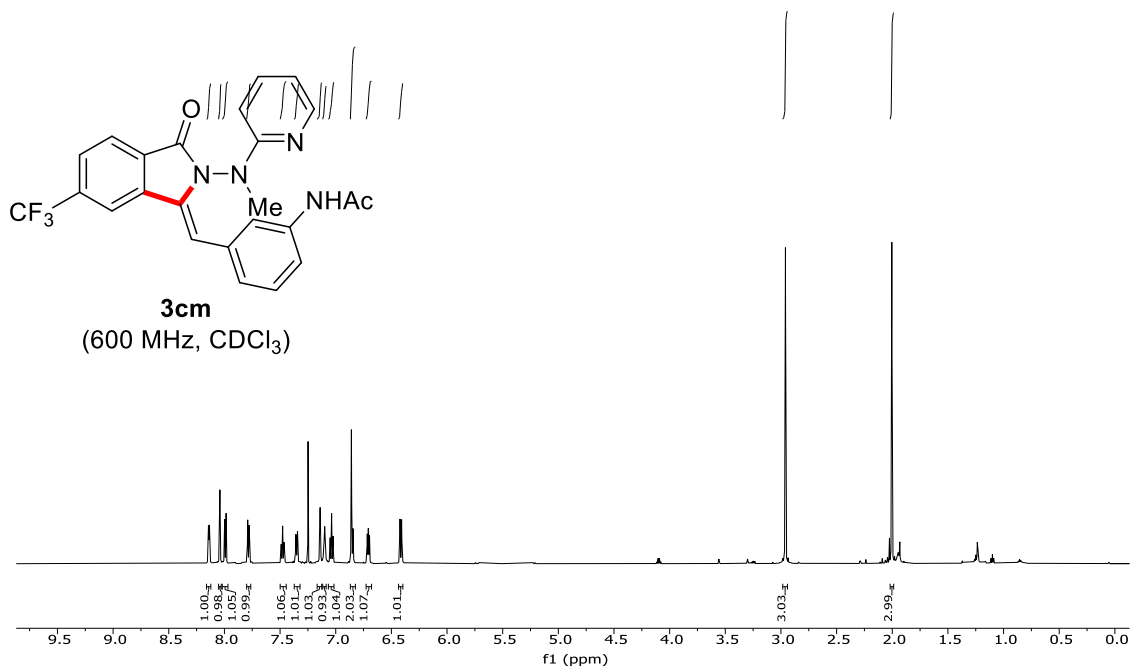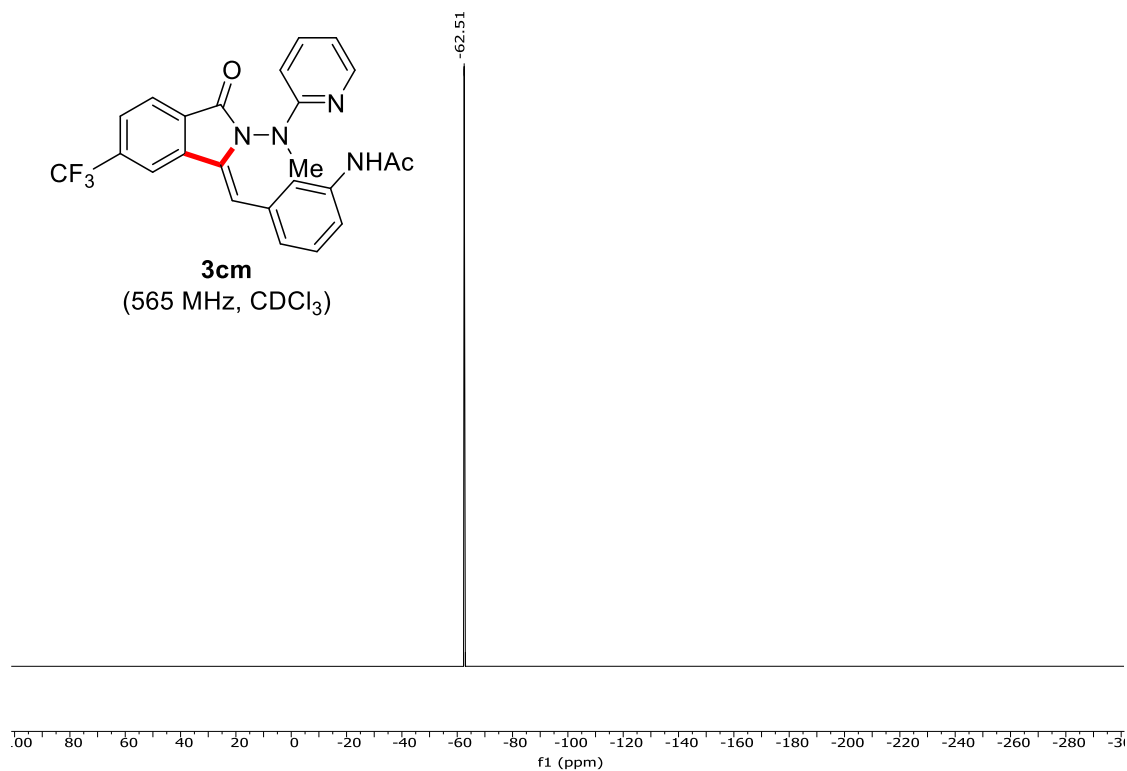



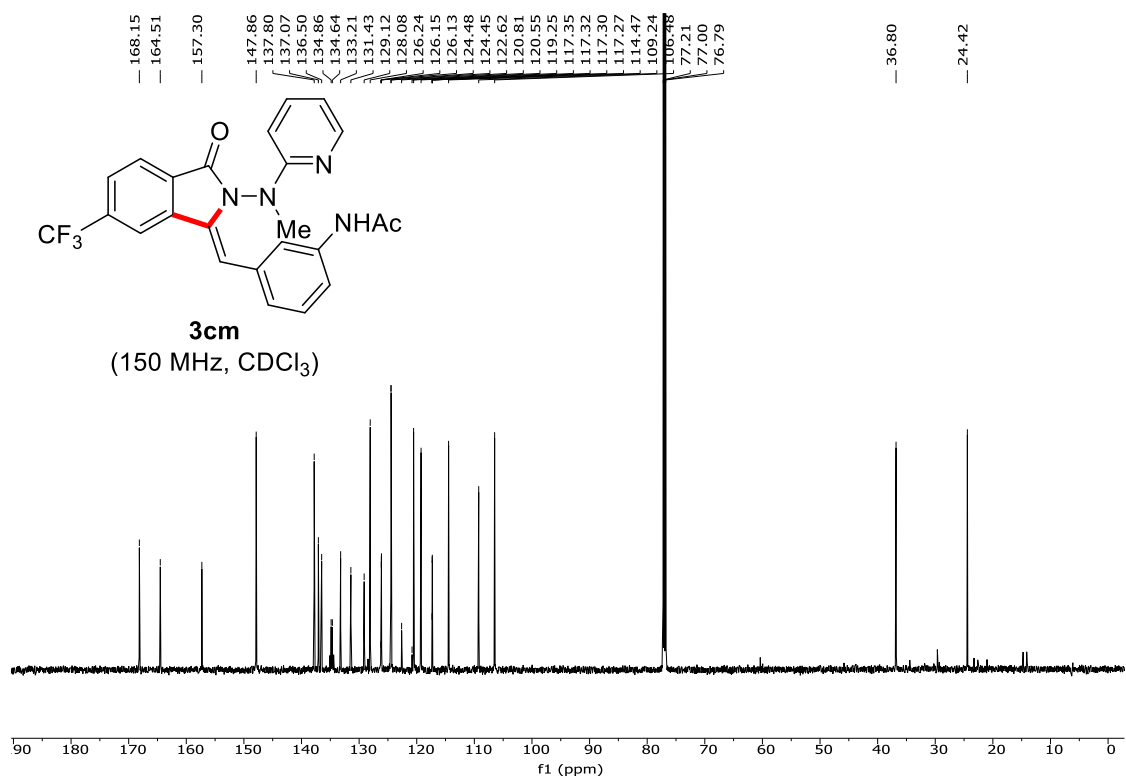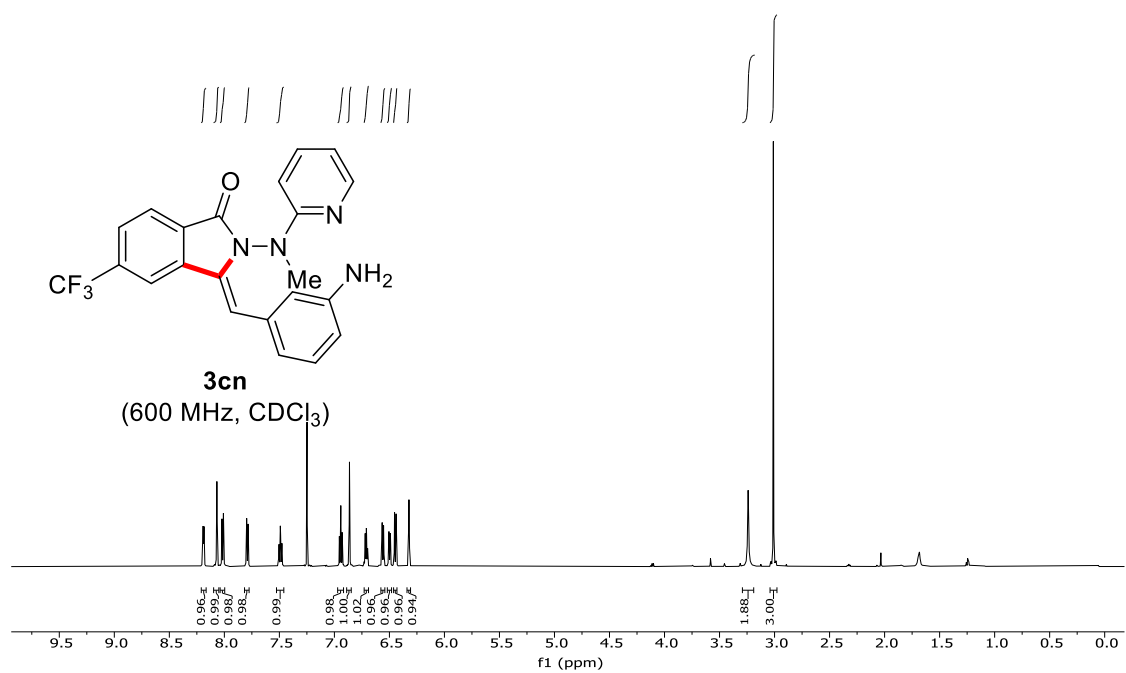

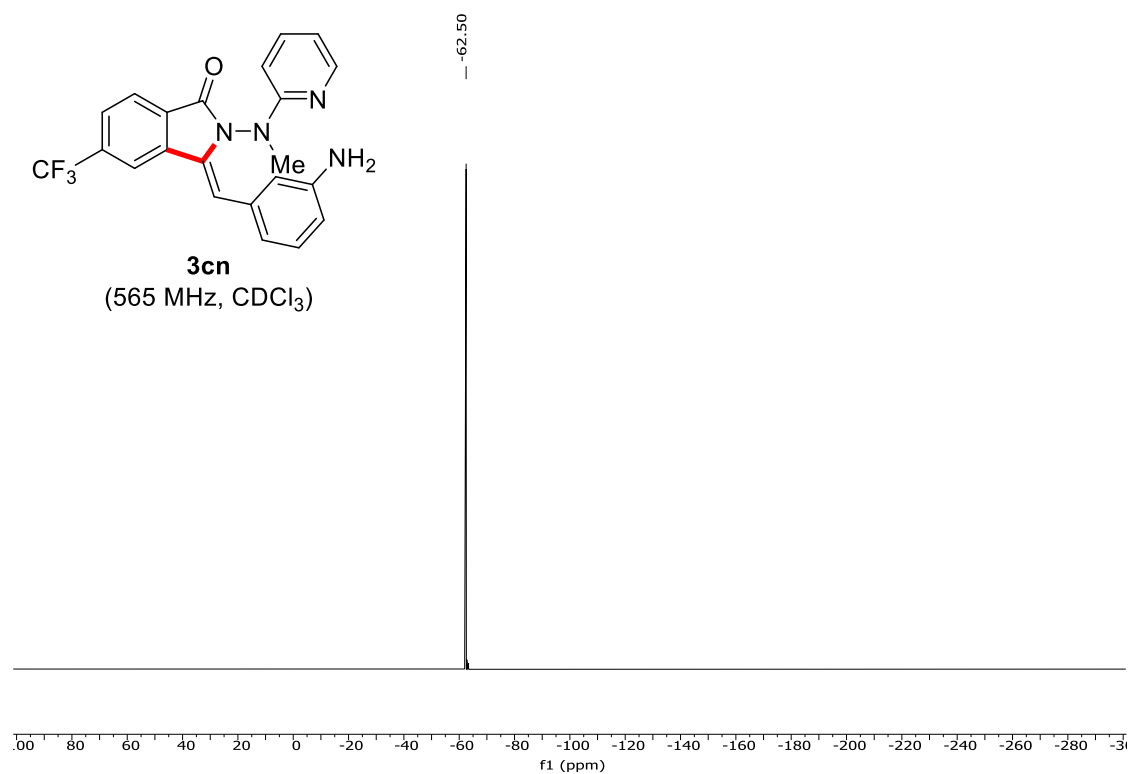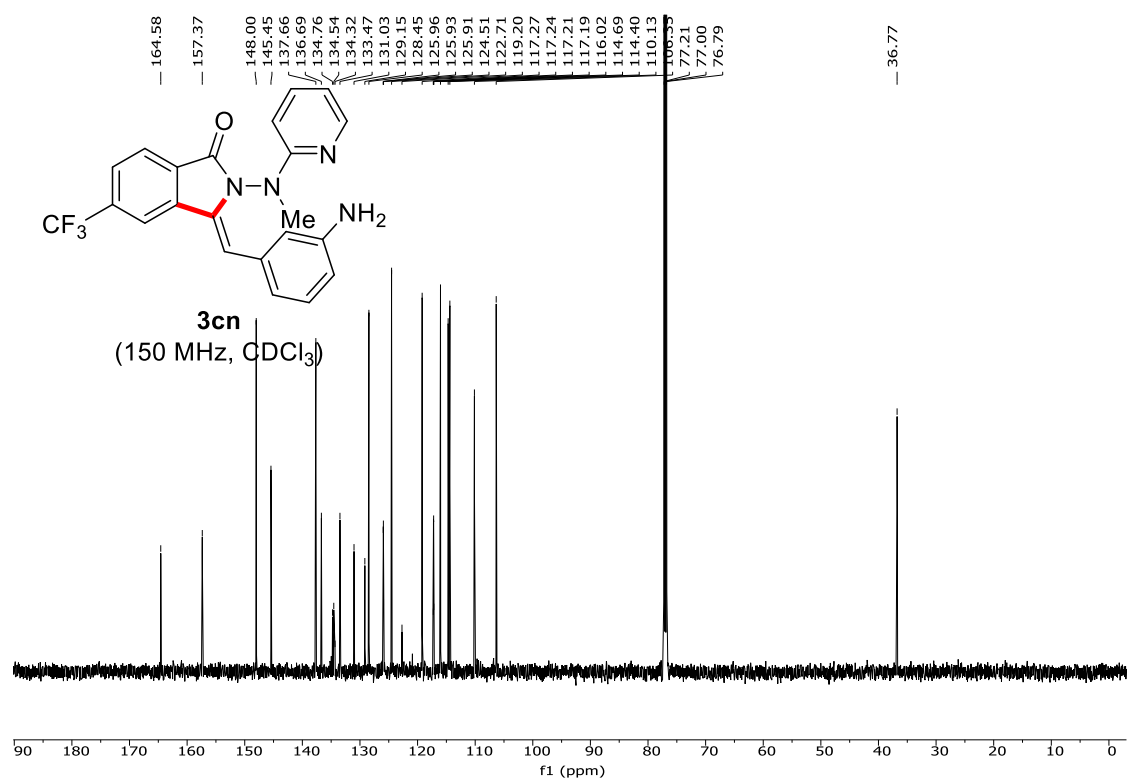

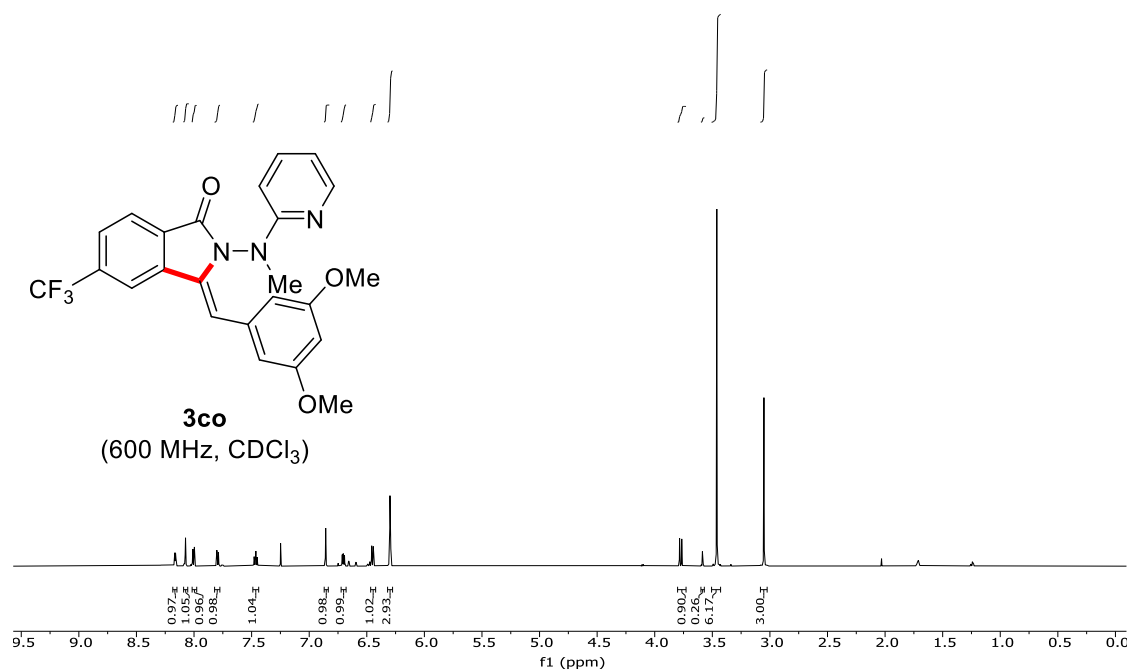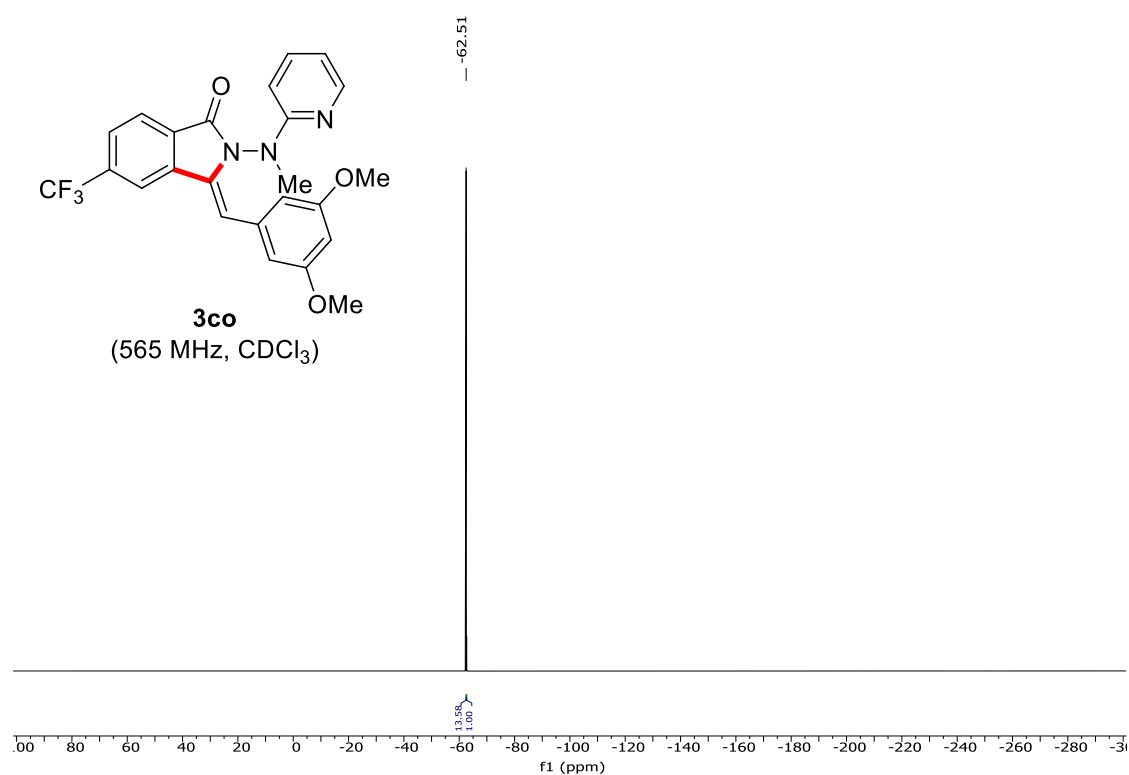

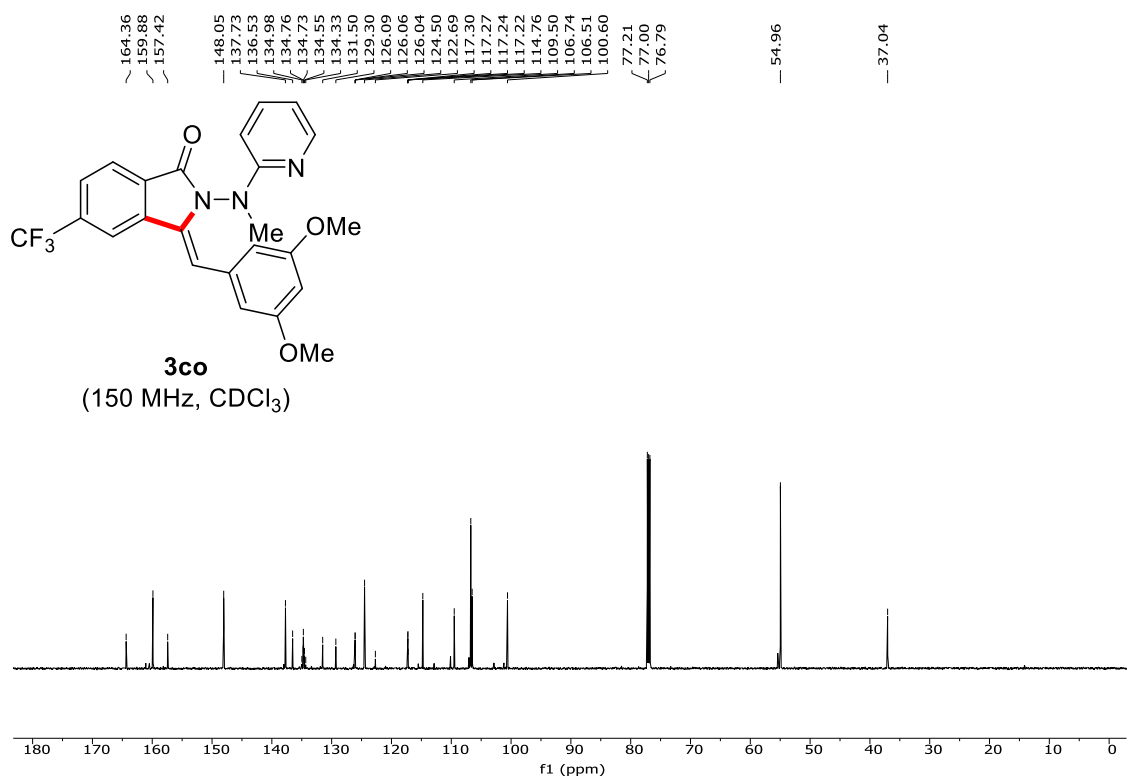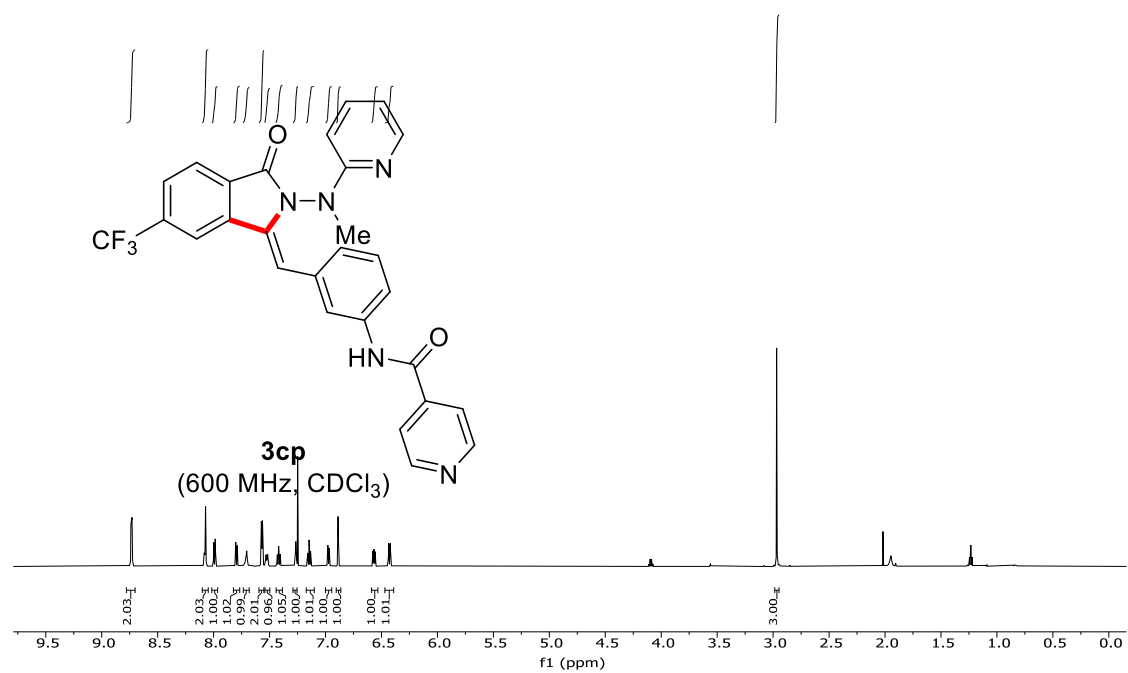

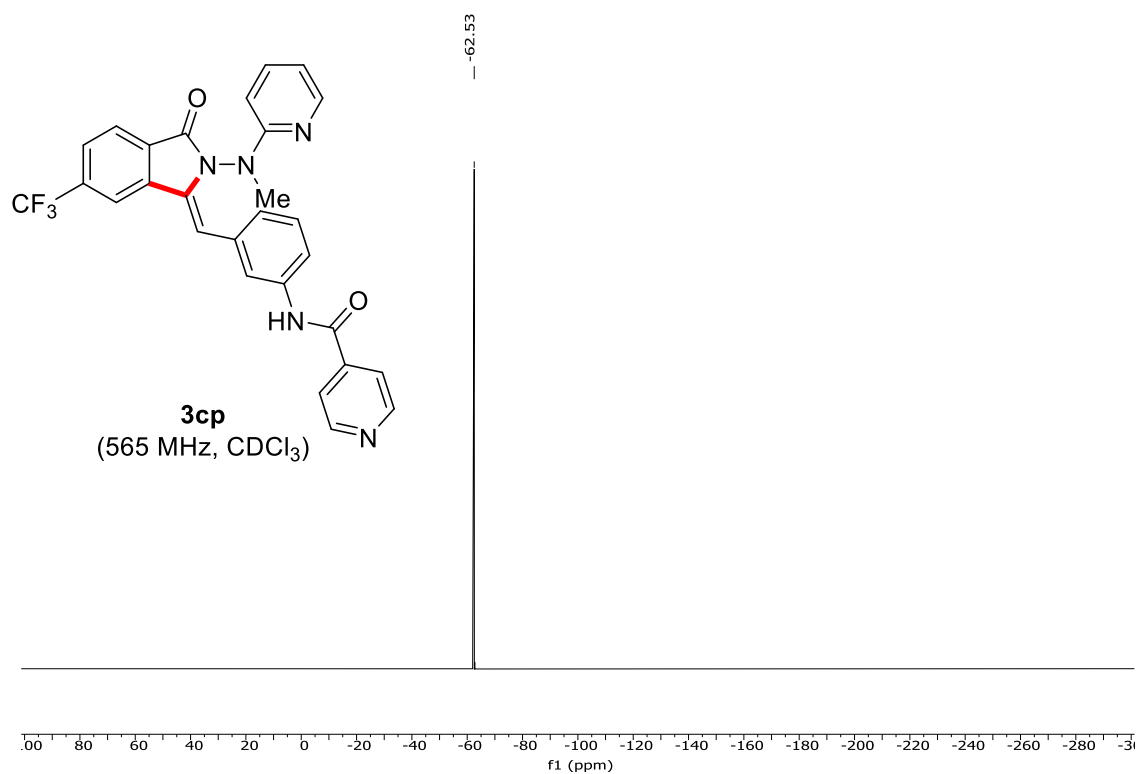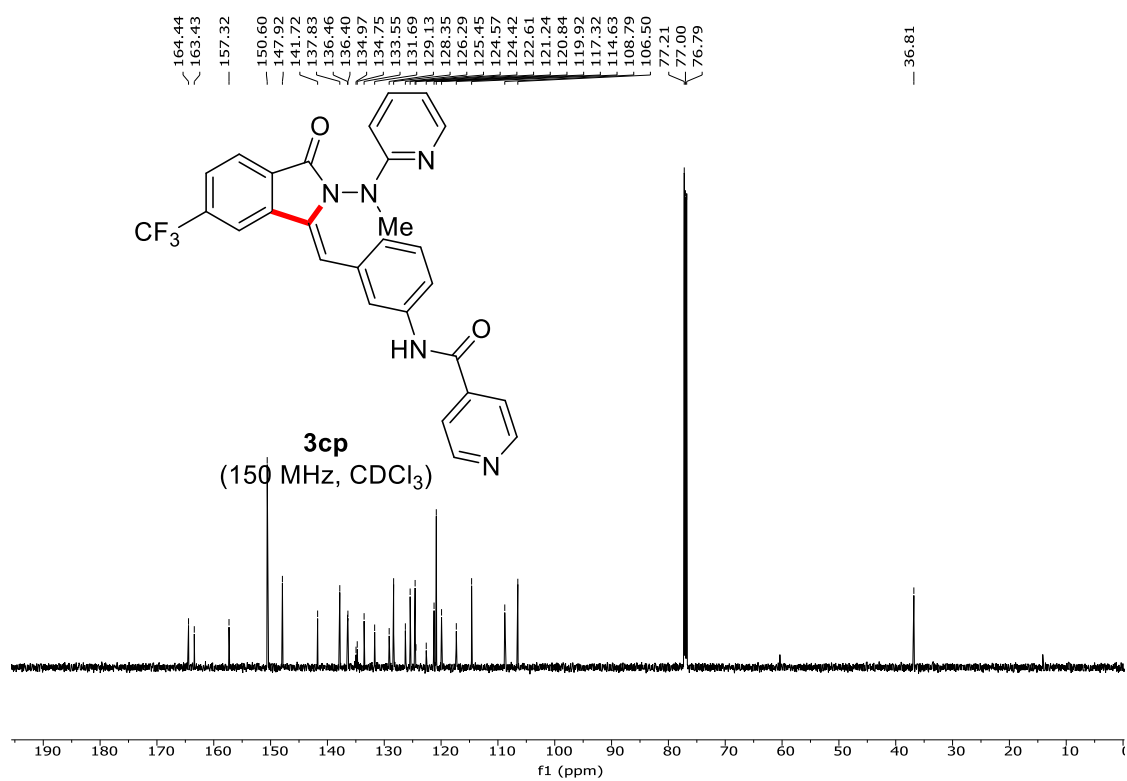

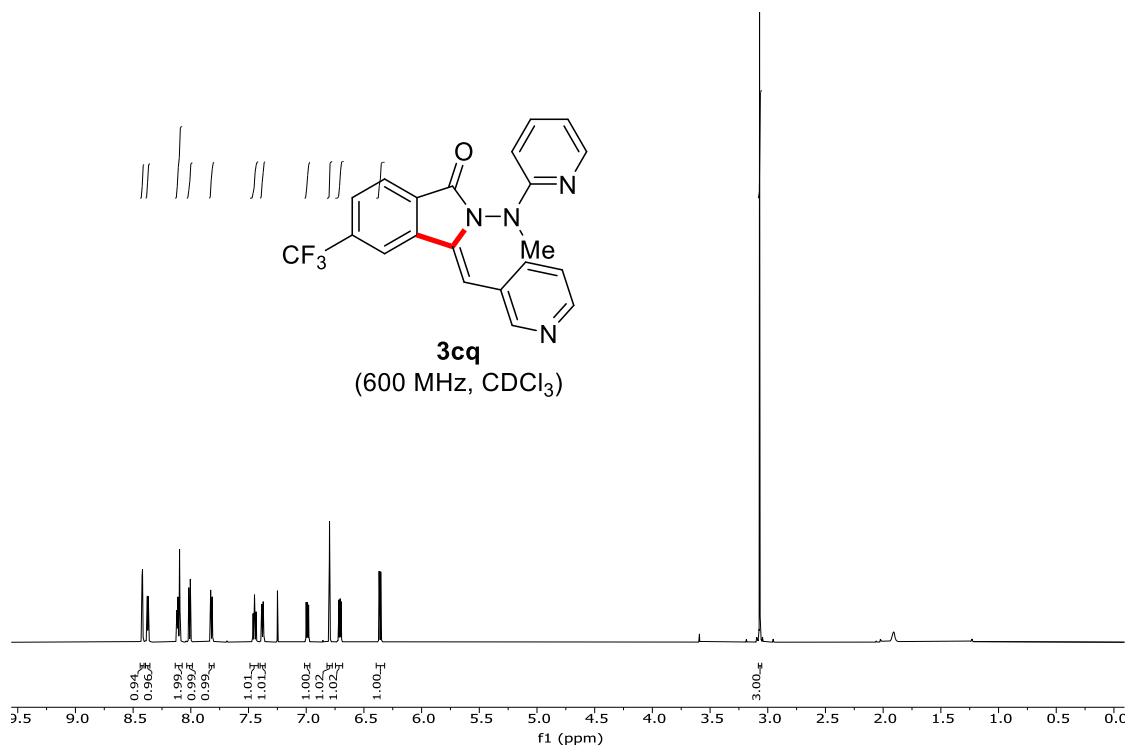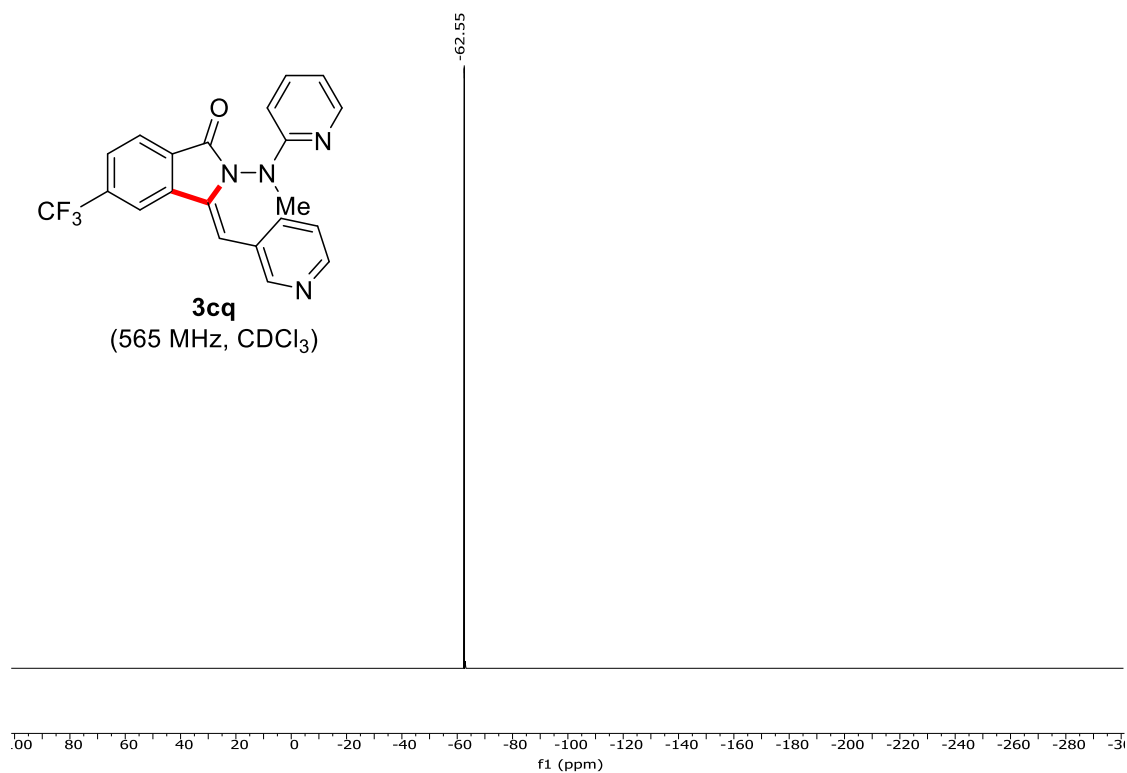

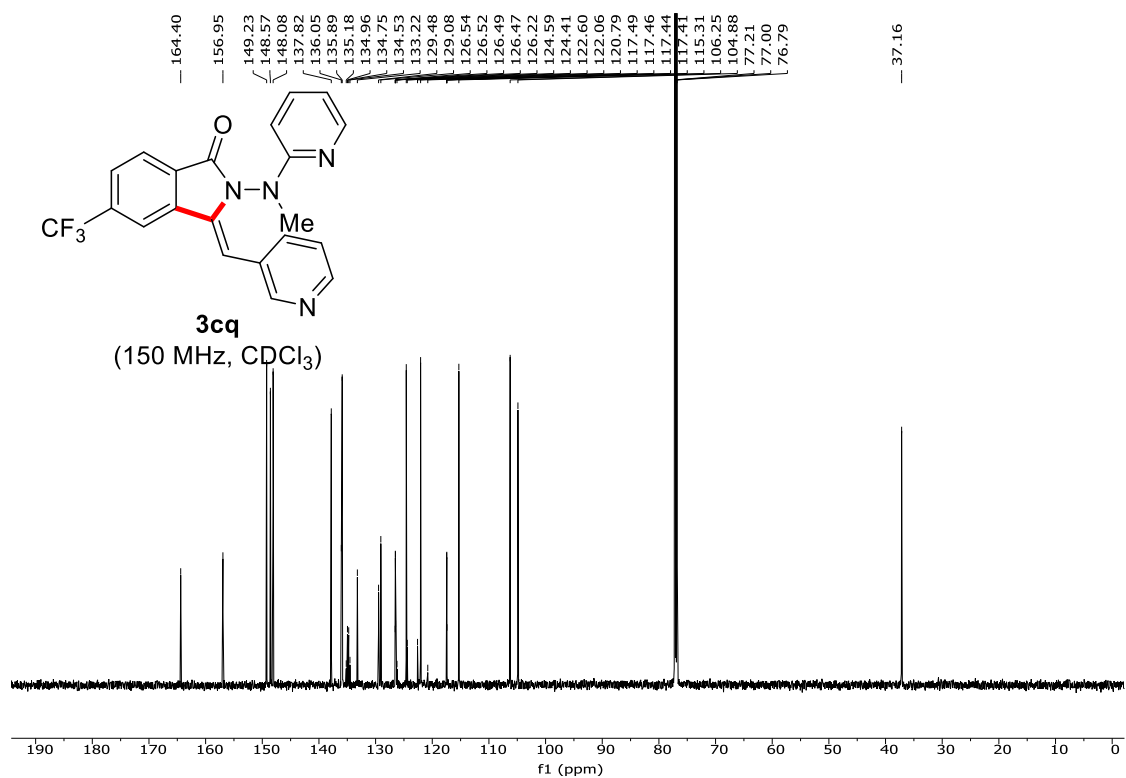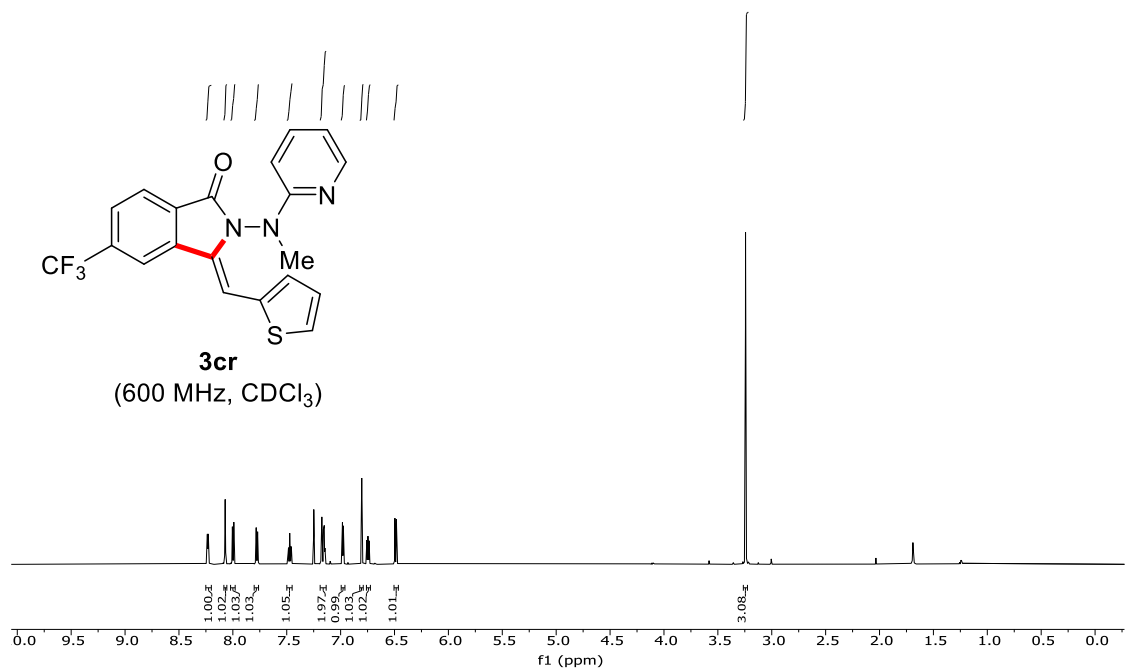

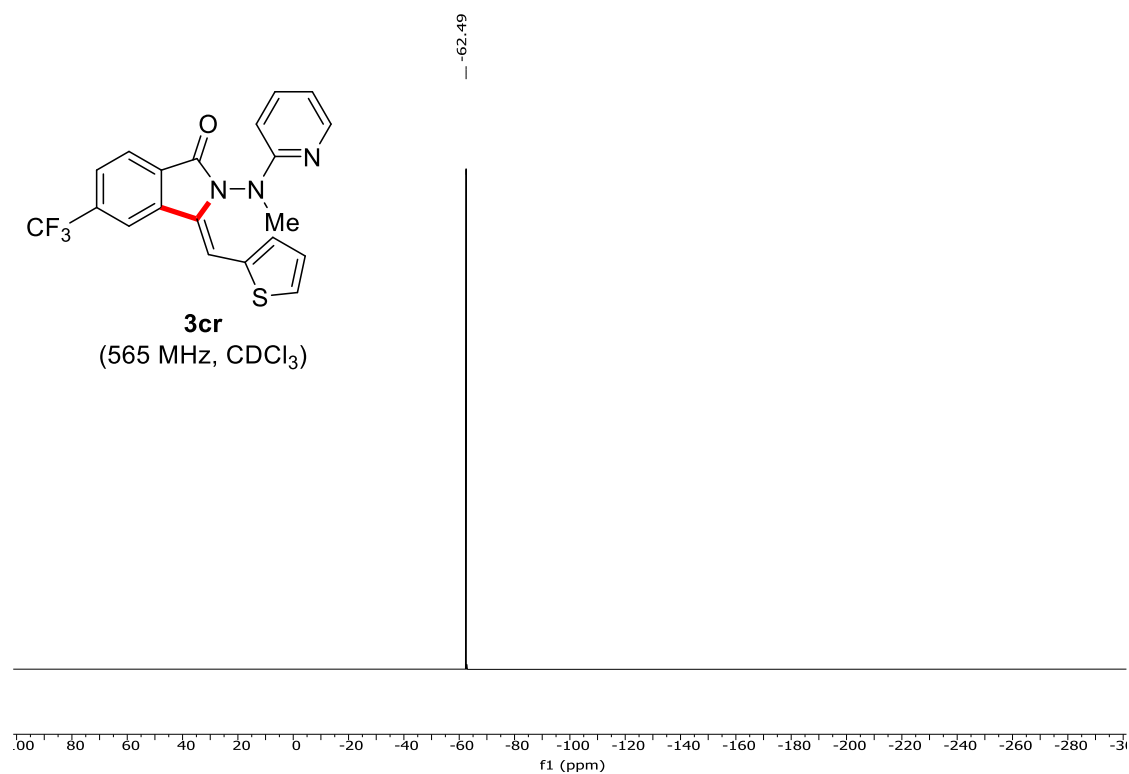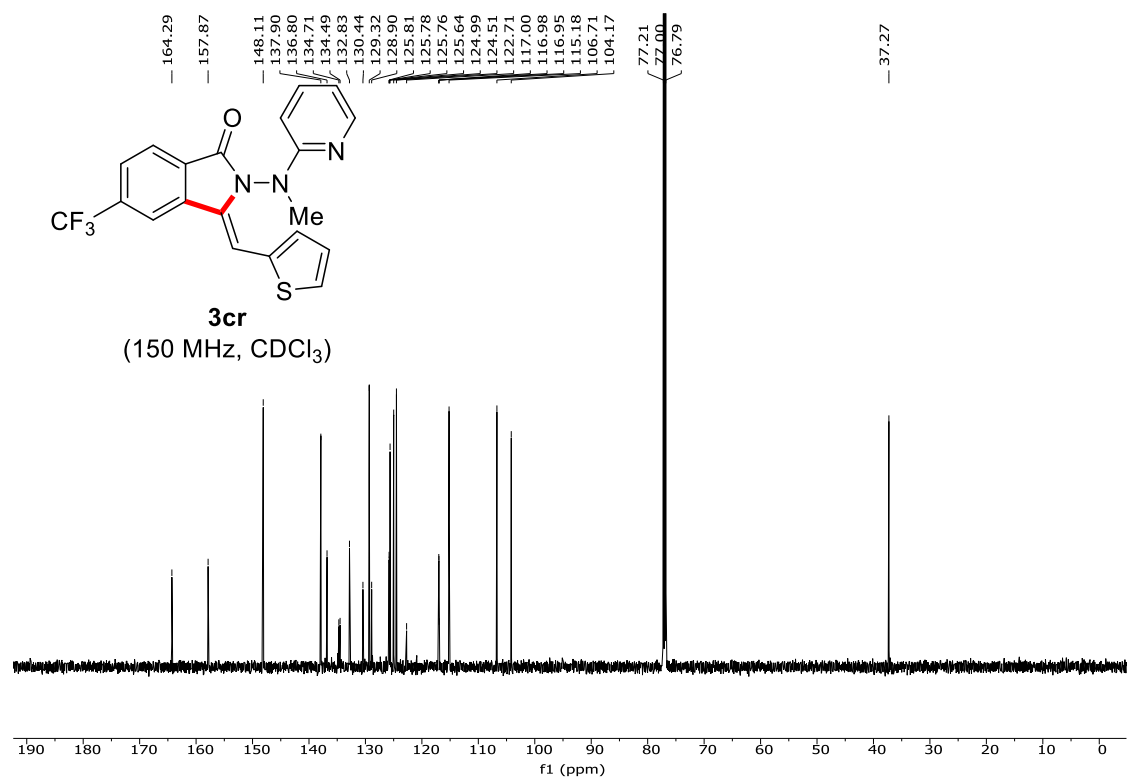



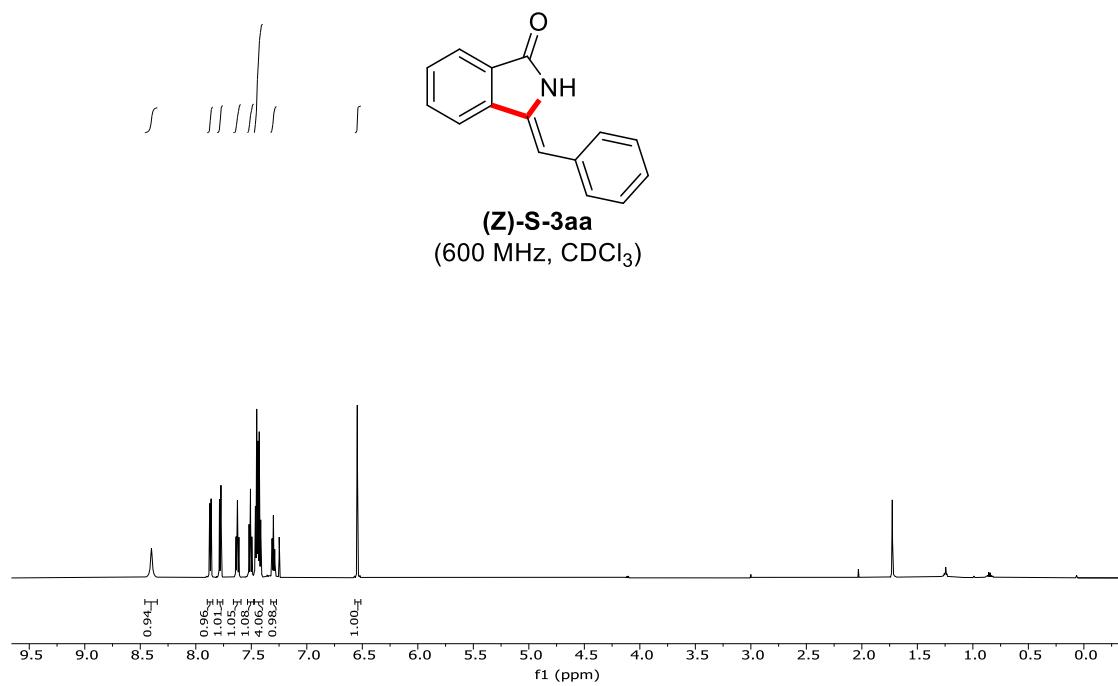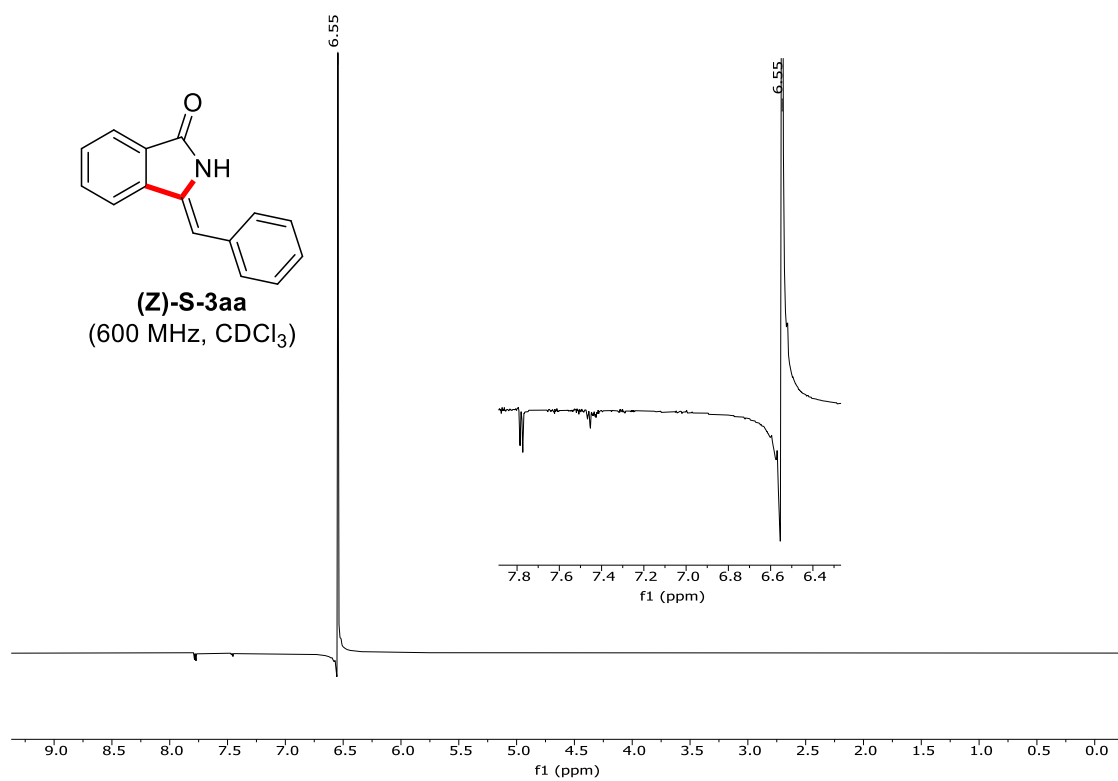

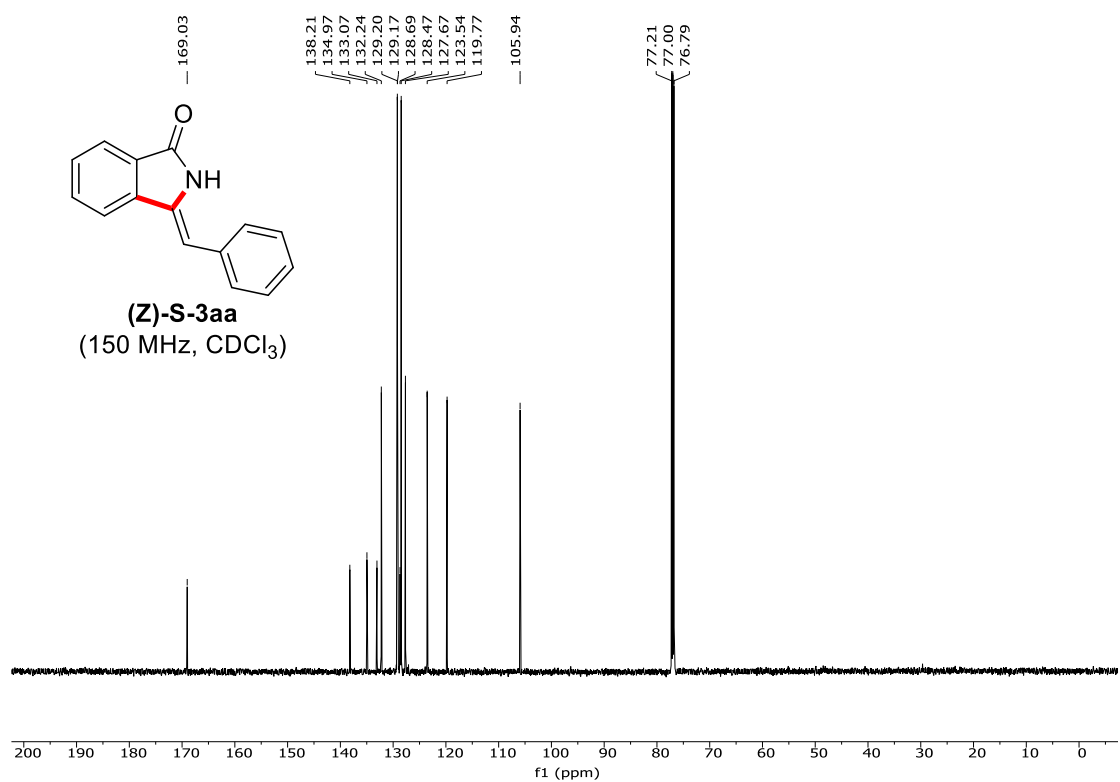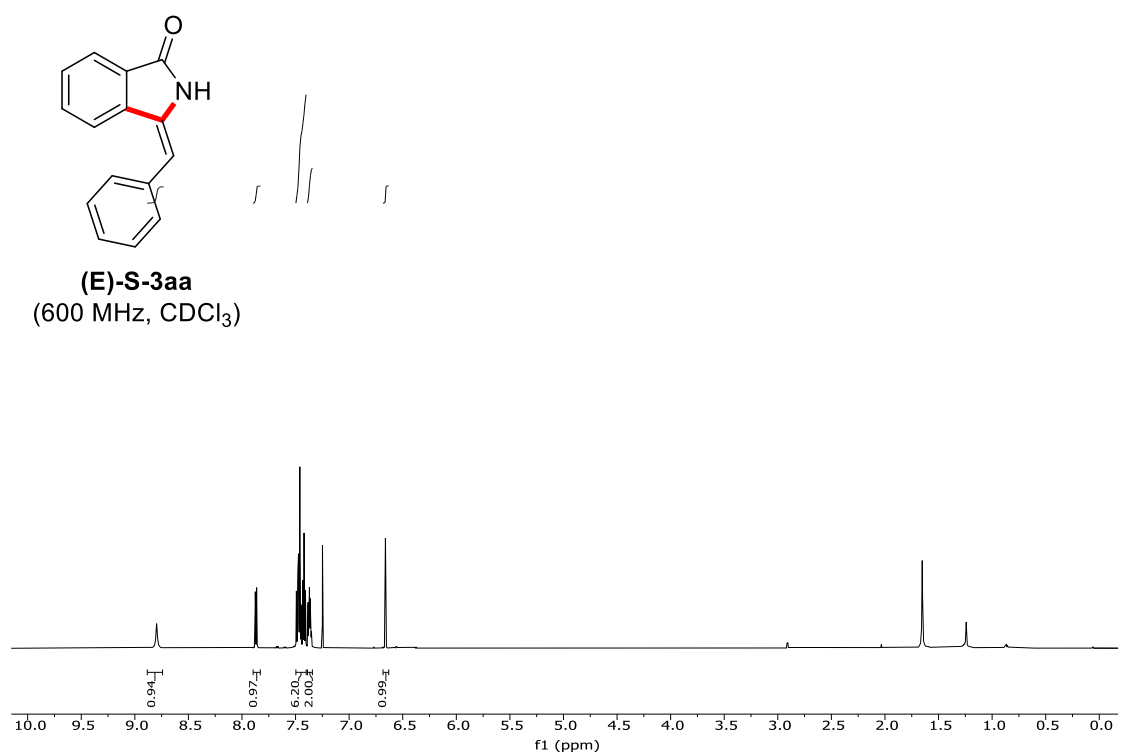

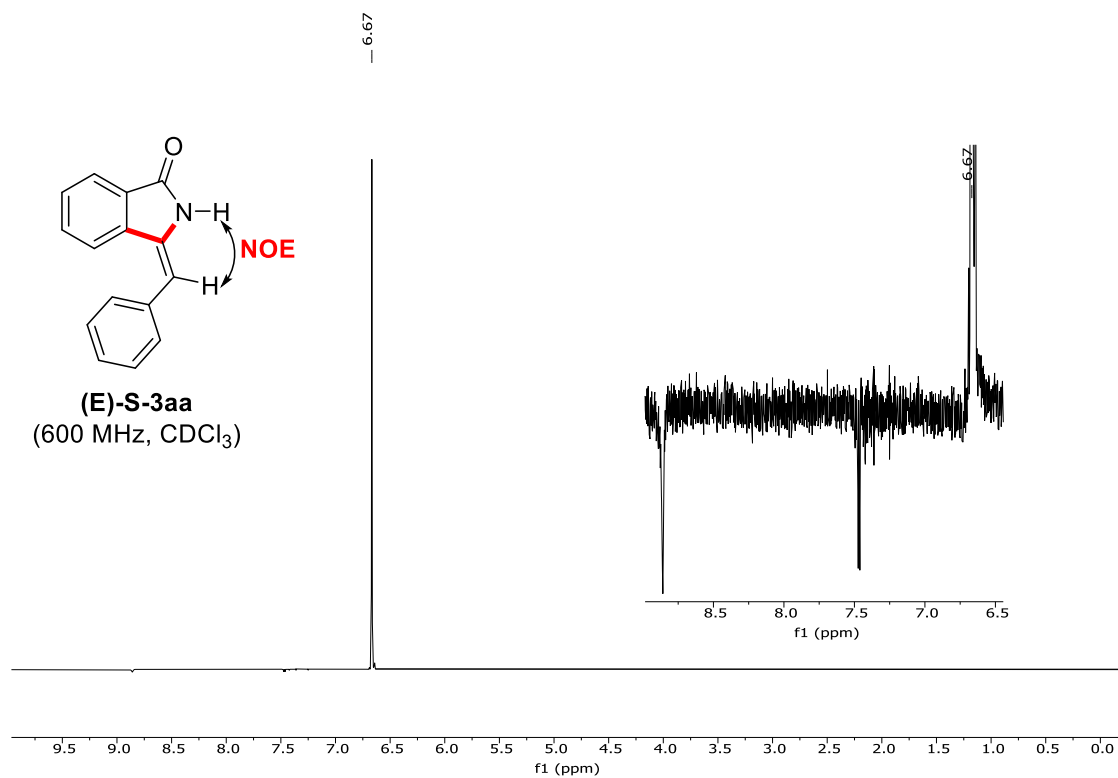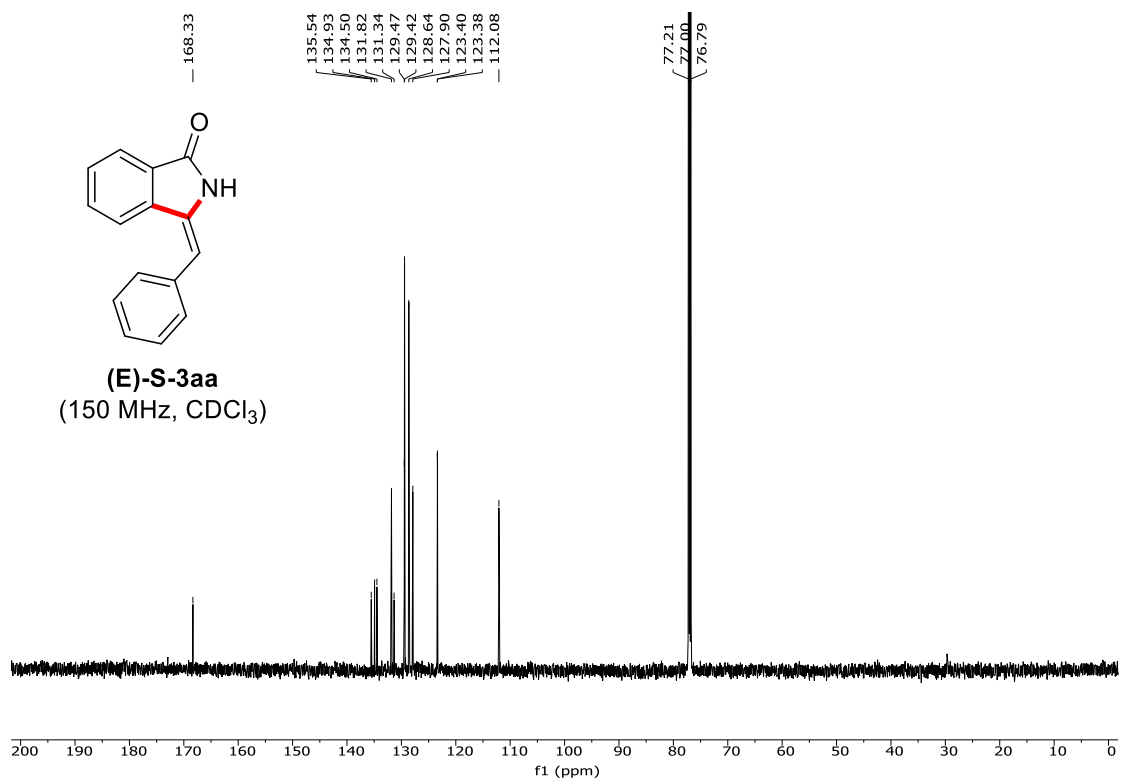

Supplement: Additional file 1 [file 1860-5397-17-113-S1.pdf]
